# Supplementary material for: Metal-free difunctionalization of alkynes to access tetrasubstituted olefins through spontaneous selenosulfonylation of vinylidene ortho-quinone methide (VQM)
Source: Royal Society of Chemistry journal article supplement (doi:10.1039/c8ob02967a), 2019-01-01
Supplement: c8ob02967a1.pdf [file c8ob02967a1.pdf]

## Supporting Information

### Metal-free Difunctionalization of Alkynes to Access Tetrasubstituted Olefins through Spontaneous Selenosulfonylation of Vinylidene *ortho*-Quinone Methide (VQM)

Shengli Huang,<sup>a,b</sup> Zhili Chen,<sup>a</sup> Hui Mao,<sup>c</sup> Fangli Hu,<sup>a</sup> Dongmei Li,<sup>a</sup> Yu Tan,<sup>a</sup> Fengqing Yang<sup>b</sup> and Wenling Qin<sup>a\*</sup>

<sup>a</sup>Chongqing Key Laboratory of Natural Product Synthesis and Drug Research, School of Pharmaceutical Sciences, Chongqing University, Chongqing 401331, P. R. China.

<sup>b</sup>School of Chemistry and Chemical Engineering, Chongqing University, Chongqing 400030, P. R. China.

<sup>c</sup>Pharmaceutical and Material Engineering School, Jinhua Polytechnic, Jinhua, 321000, Zhejiang Province, P. R. China.

[wenling.qin@cqu.edu.cn](mailto:wenling.qin@cqu.edu.cn)

### Contents

|       |                                                                                                                                                              |    |
|-------|--------------------------------------------------------------------------------------------------------------------------------------------------------------|----|
| I.    | General information .....                                                                                                                                    | 2  |
| II.   | General procedure for the synthesis of <i>o</i> -alkynylnaphthols .....                                                                                      | 2  |
| III.  | General procedure for the synthesis of <i>o</i> -alkynylphenols.....                                                                                         | 4  |
| IV.   | General procedure for the synthesis of selenosulfonates .....                                                                                                | 4  |
| V.    | Optimization of the reaction conditions .....                                                                                                                | 6  |
| VI.   | General procedure for the synthesis of compounds <b>3</b> or <b>4</b> .....                                                                                  | 8  |
| VII.  | General procedure for the synthesis of compounds <b>3t</b> and <b>3u</b> .....                                                                               | 8  |
| VIII. | Mechanistic studies .....                                                                                                                                    | 8  |
| IX.   | Synthetic transformations .....                                                                                                                              | 9  |
| X.    | <sup>1</sup> H, <sup>13</sup> C NMR and HRMS data of compounds ( <b>1t</b> , <b>1u</b> , <b>3a-3u</b> , <b>4a-4n</b> , <b>7</b> , <b>8</b> , <b>9</b> )..... | 10 |
| XI.   | HPLC traces of compound <b>3a'</b> .....                                                                                                                     | 21 |
| XII.  | <sup>1</sup> H and <sup>13</sup> C NMR spectra of compounds ( <b>1t</b> , <b>1u</b> , <b>3a-3u</b> , <b>4a-4n</b> , <b>7</b> , <b>8</b> , <b>9</b> ) .....   | 22 |
| XIII. | X-Ray Crystallographic information .....                                                                                                                     | 62 |
| XIV.  | Reference .....                                                                                                                                              | 63 |

## I. General information

$^1\text{H}$  and  $^{13}\text{C}$  NMR spectra were recorded on Agilent 400MR DD2 (400 MHz) spectrometer and Agilent 600MR DD2 (600 MHz) spectrometer. Chemical shifts were reported in parts per million (ppm), and tetramethylsilane or the residual solvent peak was used as an internal reference:  $\text{CDCl}_3$  ( $^1\text{H}$  NMR  $\delta$  0.00,  $^{13}\text{C}$  NMR  $\delta$  77.00). Data are reported as follows: chemical shift, multiplicity (s = singlet, d = doublet, t = triplet, q = quartet, m = multiplet, br = broad), coupling constants (Hz) and integration. High resolution mass spectra (HRMS) were performed on Bruker Solarix 7.0T. X-ray crystallography analysis of single crystal was performed on an Agilent SuperNova-CCD X-Ray diffractometer. Melting points were measured using SGWX-4A Microscopic melting point meter and are uncorrected. Enantiomeric excesses (ee) were determined by HPLC analysis on Hitachi Chromaster using DAICEL CHIRALCEL AD-H, 4.6 mm  $\Phi$   $\times$  250 mmL. Unless otherwise stated, all reagents were purchased from commercial suppliers and used without further purification.

## II. General procedure for the synthesis of *o*-alkynylnaphthols

The preparation of *o*-alkynylnaphthols were followed the literature procedure.<sup>1, 2</sup>

### Method A: (1a, 1b, 1c, 1e, 1f, 1p, 1q, 1r, 1s)

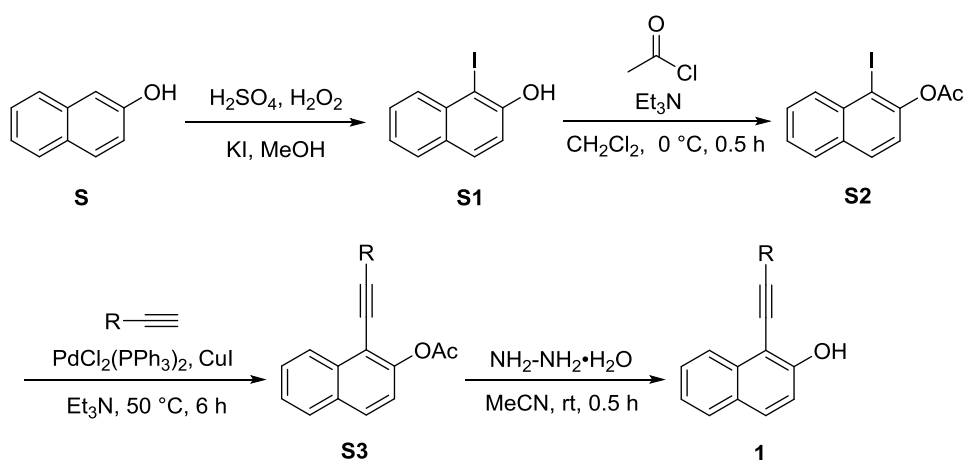

Sulfuric acid (208.0 mmol) was added to a solution of 2-naphthol **S** (20.0 g, 138.8 mmol) and potassium iodide (23.04 g, 138.8 mmol) in methanol (400 mL) at  $0\text{ }^\circ\text{C}$ . A precipitate formed, and hydrogen peroxide (30% aqueous solution, 277.6 mmol) was added. After 1.5 h of warming slowly to room temperature, the mixture was filtered, and the filtrate was concentrated. The residue was dissolved in  $\text{CH}_2\text{Cl}_2$  (300 mL), washed with 25% sat.aq.  $\text{Na}_2\text{S}_2\text{O}_3$  (250 mL) and water (200 mL), dried over  $\text{Na}_2\text{SO}_4$ , and concentrated to provide a solid (26.32 g). This material was purified by column chromatography on silica gel (PE:EA = 20:1) to provide an orange solid **S1** (34.0 g, 91%).

Acetyl chloride (1.5 equiv.) was dropwise added to a solution of **S1** (21.8 g, 80.7 mmol) and  $\text{Et}_3\text{N}$  (22.4 mL, 161.4 mmol) in  $\text{CH}_2\text{Cl}_2$  (200 mL) at  $0\text{ }^\circ\text{C}$  under  $\text{N}_2$ . The reaction mixture was

stirred at 0 °C for 30 min and then quenched with sat. aq. NH<sub>4</sub>Cl followed by extraction with CH<sub>2</sub>Cl<sub>2</sub>. The organic phase was washed with brine and dried over Na<sub>2</sub>SO<sub>4</sub>, and the solvent was removed under vacuum. The crude product was purified by column chromatography on silica gel to afford **S2** (23.9 g, 95%).

To a dry flask under N<sub>2</sub> containing **S2** (5 mmol) was sequentially added Et<sub>3</sub>N (10 mL), appropriate alkynes (5 mmol), PdCl<sub>2</sub>(PPh<sub>3</sub>)<sub>2</sub> (70 mg, 0.1 mmol), CuI (47.6 mg, 0.25 mmol). The mixture was stirred for 6 h at 50 °C. Then the mixture was filtered through a pad of celite. Removal of solvent under reduced pressure afforded a residue which is purified by column chromatography on silica gel to afford **S3**.

Hydrazine monohydrate (10 mmol) was dropwise added to a solution of **S3** (2 mmol) in CH<sub>3</sub>CN (10 mL). After the resulted mixture was stirred at room temperature for 0.5 h, the mixture was treated with sat. aq. NH<sub>4</sub>Cl and extracted with CH<sub>2</sub>Cl<sub>2</sub> and dried over Na<sub>2</sub>SO<sub>4</sub>. Removal of solvent under reduced pressure afforded a residue which is purified by column chromatography on silica gel to afford the compound **1**.

#### Method B: (1d, 1g-1o)

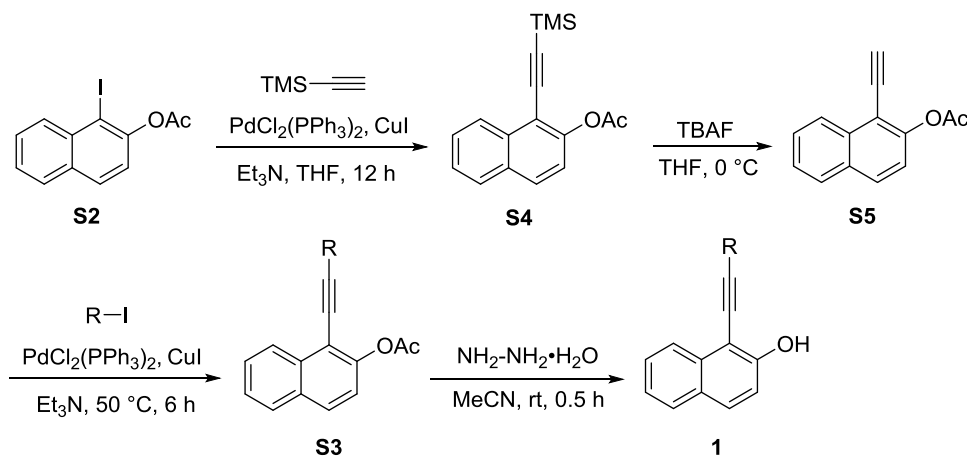

Trimethylsilylacetylene (5.9 mL, 41.7 mmol) was dropwise added to a solution of **S2** (10 g, 32.1 mmol), PdCl<sub>2</sub>(PPh<sub>3</sub>)<sub>2</sub> (1.1 g, 1.6 mmol), CuI (609 mg, 3.2 mmol) and Et<sub>3</sub>N (13.4 mL, 96.1 mmol) in THF (50 mL) at room temperature under N<sub>2</sub>. Then, the mixture was stirred for 12 h. The reaction mixture was treated with sat. aq. NH<sub>4</sub>Cl followed by extraction with CH<sub>2</sub>Cl<sub>2</sub>. The combined organic layer was washed with brine, dried over Na<sub>2</sub>SO<sub>4</sub>, and concentrated in *vacuo*. The crude product was purified by column chromatography on silica gel (PE:EA = 30:1) to afford **S4** (7.3 g, 80% yield).

To a solution of **S4** (7.0 g, 24.8 mmol) in THF (75 mL) was added TBAF in THF (1 M, 12.4 mL, 12.4 mmol) dropwise at 0 °C under N<sub>2</sub>. Then the mixture was stirred for 1 h. The reaction mixture was treated with sat. aq. NH<sub>4</sub>Cl followed by extraction with CH<sub>2</sub>Cl<sub>2</sub>. The combined organic layer was washed with brine, dried over Na<sub>2</sub>SO<sub>4</sub>, and concentrated in *vacuo*. The crude product was purified by column chromatography on silica gel (PE:EA = 100:1) to afford **S5** (3.9 g, 75% yield).

To a dry flask under N<sub>2</sub> containing the appropriate iodebenzenes (2.4 mmol) was sequentially added Et<sub>3</sub>N (5.0 mL), **S5** (500 mg, 2.4 mmol), PdCl<sub>2</sub>(PPh<sub>3</sub>)<sub>2</sub> (33.7 mg, 0.048 mmol) and CuI (22.9 mg, 0.12 mmol). The mixture was stirred for 6 h at 50 °C. Then the mixture was filtered through a pad of celite. Removal of solvent under reduced pressure afforded a residue which is purified by column chromatography on silica gel to afford **S3**.

Hydrazine monohydrate (10 mmol) was dropwise added to a solution of **S3** (2 mmol) in CH<sub>3</sub>CN (10 mL). After the resulted mixture was stirred at room temperature for 0.5 h, the mixture was treated with sat. aq. NH<sub>4</sub>Cl and extracted with CH<sub>2</sub>Cl<sub>2</sub>, and dried over Na<sub>2</sub>SO<sub>4</sub>. Removal of solvent under reduced pressure afforded a residue which is purified by column chromatography on silica gel afford the compound **1**.

### III. General procedure for the synthesis of *o*-alkynylphenols

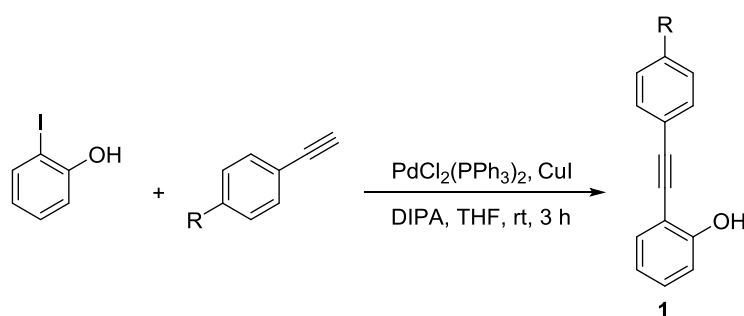

To a dry flask under N<sub>2</sub> containing 2-iodophenol (10.0 mmol) was sequentially added THF (25 mL), diisopropylamine (10.0 mmol), appropriate alkynes (12.0 mmol), PdCl<sub>2</sub>(PPh<sub>3</sub>)<sub>2</sub> (0.3 mmol), CuI (0.9 mmol). The resulting solution was stirred at room temperature for 3 h. Then the mixture was filtered through a pad of celite. Removal of solvent under reduced pressure afforded a residue which is purified by column chromatography on silica gel to afford appropriate *o*-alkynylphenols.

### IV. General procedure for the synthesis of selenosulfonates

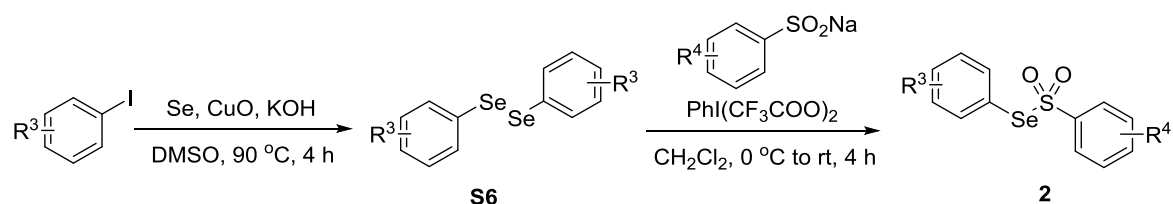

The preparation of compound **S6** were followed the literature procedure.<sup>3</sup> To a stirred solution of Se<sup>0</sup> metal (10 mmol, 2.0 equiv.) and halides (5 mmol, 1.0 equiv.) in DMSO (10 mL) was added CuO nanoparticles (0.5 mmol, 0.1 equiv.) followed by KOH (10 mmol, 2.0 equiv.) under nitrogen atmosphere. The resulting reaction mixture was stirred at 90 °C for 6 h. After the reaction was complete, the reaction mixture was allowed to cool, extraction with CH<sub>2</sub>Cl<sub>2</sub>. The combined organic layer was washed with brine, dried over Na<sub>2</sub>SO<sub>4</sub>, and concentrated in *vacuo*. The crude product was purified by column chromatography on silica gel (PE:EA = 100:1) to afford **S6**.

The preparation of compound **2** were followed the literature procedure.<sup>4</sup> A suspension of appropriate sodium benzenesulfonates (20 mmol, 4.0 equiv.) in CH<sub>2</sub>Cl<sub>2</sub> (50 mL) containing **S6** (5 mmol, 1.0 equiv.) was cooled at 0 °C and [bis(trifluoroacetoxy)iodo]benzene (5.5 mmol, 1.1 equiv.) in CH<sub>2</sub>Cl<sub>2</sub> (20 mL) was added dropwise. Then the mixture was stirred at room temperature for 3 h. The reaction mixture was washed with H<sub>2</sub>O, dried over anhydrous Na<sub>2</sub>SO<sub>4</sub>. The solvent CH<sub>2</sub>Cl<sub>2</sub> was removed under reduced pressure and the residue was purified by column chromatography on silica gel (PE:EA = 6:1) to afford compound **2**.

## V. Optimization of the reaction conditions

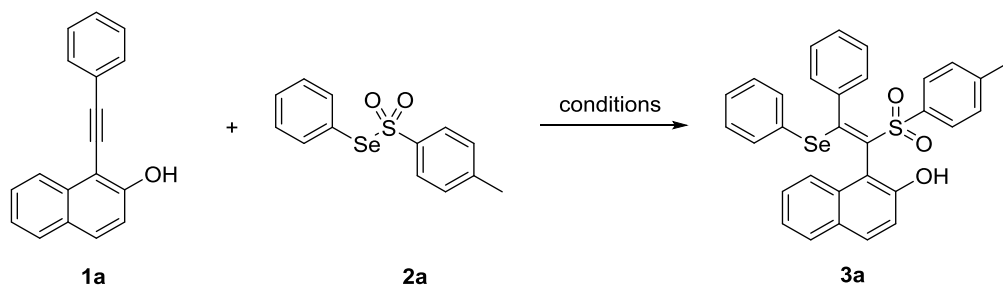

**Table 1. Screening of solvent<sup>[a]</sup>**

| entry            | solvent                         | additive | yield (%) <sup>[b]</sup> | <i>E</i> : <i>Z</i> <sup>[c]</sup> |
|------------------|---------------------------------|----------|--------------------------|------------------------------------|
| 1                | CH <sub>2</sub> Cl <sub>2</sub> | -        | 73                       | >99:1                              |
| 2                | CH <sub>3</sub> OH              | -        | 69                       | >99:1                              |
| 3                | DCE                             | -        | 85                       | >99:1                              |
| 4                | <i>m</i> -xylene                | -        | 60                       | >99:1                              |
| 5                | toluene                         | -        | 63                       | >99:1                              |
| 6 <sup>[d]</sup> | toluene                         | -        | 64                       | >99:1                              |
| 7                | CH <sub>3</sub> CN              | -        | 54                       | >99:1                              |
| 8                | CHCl <sub>3</sub>               | -        | 52                       | >99:1                              |
| 9                | THF                             | -        | <5                       | >99:1                              |

<sup>[a]</sup>Reaction conditions: **1a** (0.1 mmol), **2a** (0.1 mmol) in solvent (1.0 mL) at room temperature for 10 h. <sup>[b]</sup>Yield ratio was determined by column chromatography. <sup>[c]</sup>Determined by <sup>1</sup>H NMR analysis. <sup>[d]</sup>The reaction were carried out at 80 °C.

**Table 2. Screening of additive<sup>[a]</sup>**

| entry | solvent | additive                       | yield (%) <sup>[b]</sup> | <i>E</i> : <i>Z</i> <sup>[c]</sup> |
|-------|---------|--------------------------------|--------------------------|------------------------------------|
| 1     | DCE     | Et <sub>3</sub> N              | 67                       | >99:1                              |
| 2     | DCE     | K <sub>2</sub> CO <sub>3</sub> | 69                       | >99:1                              |
| 3     | DCE     | KF                             | 73                       | >99:1                              |
| 4     | DCE     | DABCO                          | 70                       | >99:1                              |
| 5     | DCE     | malonic acid                   | 72                       | >99:1                              |
| 6     | DCE     | benzoic acid                   | 54                       | >99:1                              |
| 7     | DCE     | citric acid                    | 57                       | >99:1                              |
| 8     | DCE     | cinnamic acid                  | 49                       | >99:1                              |
| 9     | DCE     | boric acid                     | <5                       | >99:1                              |
| 10    | DCE     | AIBN                           | 48                       | >99:1                              |

<sup>[a]</sup>Reaction conditions: **1a** (0.1 mmol), **2a** (0.1 mmol), additive (0.1 mmol) in DCE (1.0 mL) at room temperature for 10 h.

<sup>[b]</sup>Yield ratio was determined by column chromatography. <sup>[c]</sup>Determined by <sup>1</sup>H NMR analysis.

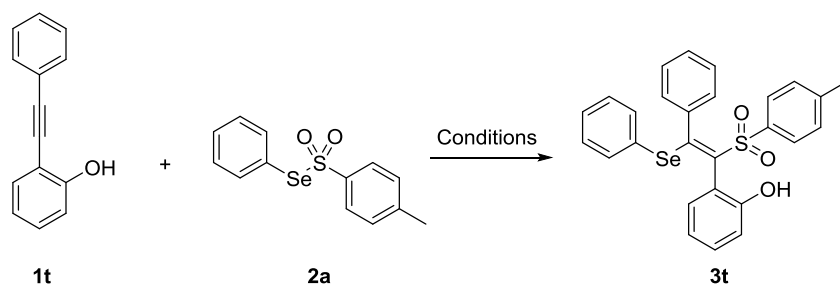

**Table 3. Screening of conditions for phenol derivatives<sup>[a]</sup>**

| entry | solvent | base                            | <i>T</i> (°C) | time (h) | yield (%) <sup>[b]</sup> |
|-------|---------|---------------------------------|---------------|----------|--------------------------|
| 1     | DCE     | -                               | r.t           | 96       | 0                        |
| 2     | DCE     | -                               | reflux        | 48       | 0                        |
| 3     | toluene | -                               | reflux        | 48       | 0                        |
| 4     | DMF     | -                               | reflux        | 48       | 0                        |
| 5     | DMSO    | -                               | reflux        | 48       | 0                        |
| 6     | DCE     | K <sub>2</sub> CO <sub>3</sub>  | r.t           | 48       | 0                        |
| 7     | DCE     | KF                              | r.t           | 24       | 0                        |
| 8     | DCE     | Na <sub>2</sub> CO <sub>3</sub> | r.t           | 24       | 0                        |
| 9     | DCE     | KOH                             | r.t           | 24       | 0                        |
| 10    | DCE     | NaOH                            | r.t           | 24       | 0                        |
| 11    | DCE     | <i>t</i> -BuOK                  | r.t           | 24       | 0                        |
| 12    | DCE     | EtONa                           | r.t           | 24       | 0                        |
| 13    | DCE     | MeONa                           | r.t           | 24       | 0                        |
| 14    | DCE     | NaOAc                           | r.t           | 24       | 0                        |
| 15    | DCE     | DABCO                           | r.t           | 24       | 0                        |
| 16    | DCE     | DBU                             | r.t           | 24       | 0                        |
| 17    | DCE     | Et <sub>3</sub> N               | r.t           | 24       | trace                    |
| 18    | toluene | Et <sub>3</sub> N               | reflux        | 16       | 20                       |

<sup>[a]</sup>Unless otherwise noted, all reactions were carried out with **1t** (0.2 mmol) and **2a** (0.2 mmol) in 2.0 mL solvents loading at corresponding temperature and reaction time. <sup>[b]</sup>Isolated yield of **3t**.

## VI. General procedure for the synthesis of compounds **3** or **4**

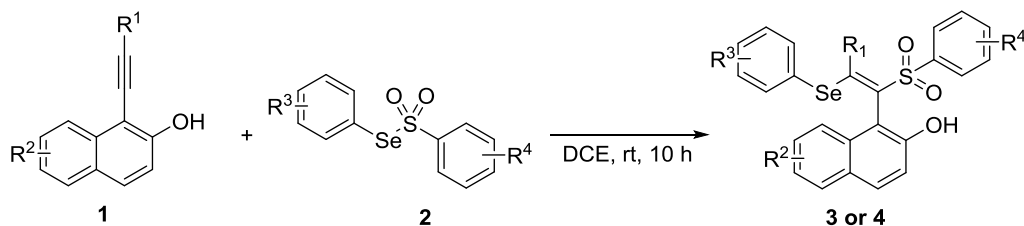

The substrate **1** (0.2 mmol) and selenosulfonate **2** (0.2 mmol) were added to a 10 mL flame-dried schlenk tube with a magnetic stirring bar. DCE (2.0 mL) was injected into the tube. After stirring at room temperature for 10 h, the mixture was evaporated and purified by column chromatography on silica gel (PE:EA = 4:1) to afford the products **3** or **4**.

## VII. General procedure for the synthesis of compounds **3t** and **3u**

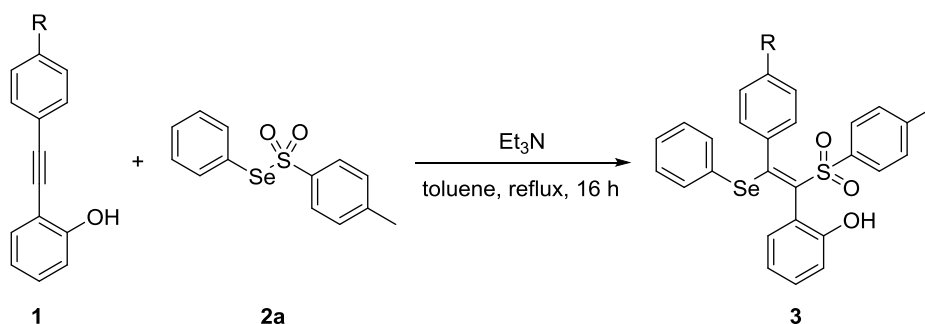

The Et<sub>3</sub>N (1.0 mmol) was added to a solution of substrate **1t** or **1u** (1.0 mmol) and selenosulfonate **2a** (1.0 mmol) in toluene (10 mL). After reflux for 16 h, The mixture was evaporated and purified by column chromatography on silica gel (PE:EA = 4:1) to afford the products **3t** or **3u**.

## VIII. Mechanistic studies

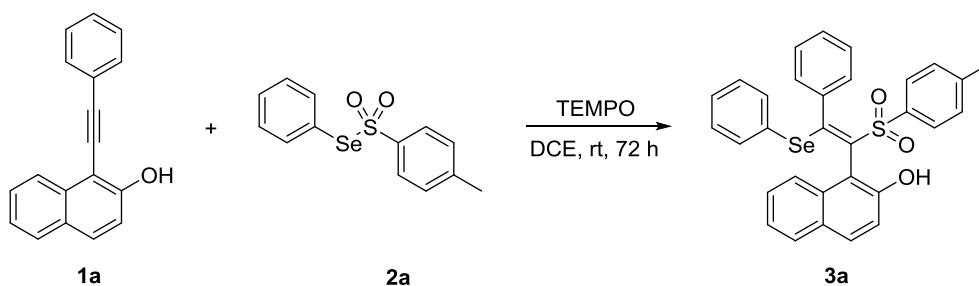

The substrate **1a** (0.1 mmol), selenosulfonate **2a** (0.1 mmol) and (2,2,6,6-tetramethyl-1-piperidinyloxy) (TEMPO) (0.1 mmol) were added to a 10 mL flame-dried schlenk tube with a magnetic stirring bar. DCE (1.0 mL) was injected into the tube. After stirring at room temperature for 72 h, The mixture was evaporated and purified by column chromatography on silica gel (PE:EA = 4:1) to afford the product **3a**.

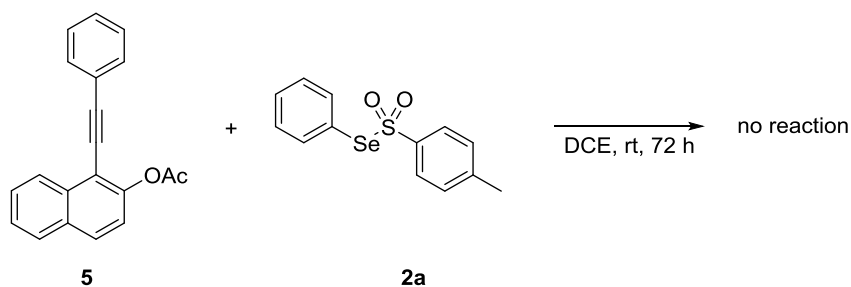

The substrate **5** (0.1 mmol) and selenosulfonate **2a** (0.1 mmol) were added to a 10 mL flame-dried schlenk tube with a magnetic stirring bar. DCE (1.0 mL) was injected into the tube. Then the mixture was stirring at room temperature for 72 h.

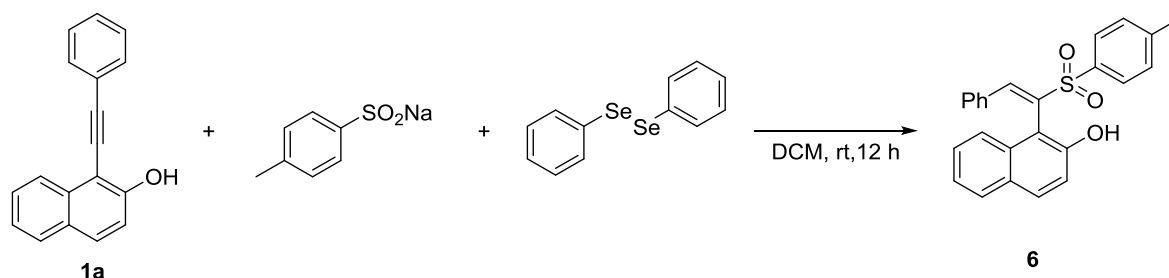

The substrate **1a** (0.2 mmol), sodium 4-methylbenzenesulfonate (0.2 mmol) and diphenyl diselenide (0.2 mmol) were added to a 10 mL flame-dried schlenk tube with a magnetic stirring bar.  $\text{CH}_2\text{Cl}_2$  (2.0 mL) was injected into the tube. After stirring at room temperature for 12 h, The mixture was evaporated and purified by column chromatography on silica gel (PE:EA = 4:1) to afford the compound **6** (20% yield).

## IX. Synthetic transformations

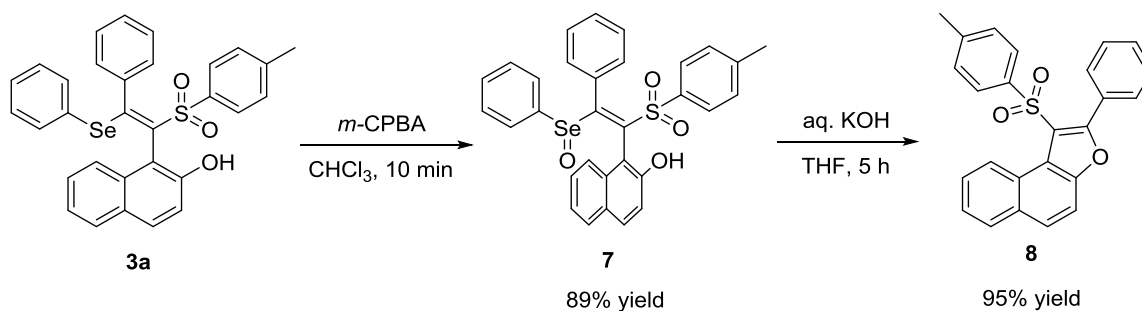

The preparation of compound **7** were followed the literature procedure.<sup>5</sup> *m*-CPBA (0.6 mmol, 1.2 equiv.) was dissolved in 5 mL of  $\text{CHCl}_3$  and added to a solution of **3a** (0.5 mmol, 1 equiv.) in 20 mL of  $\text{CHCl}_3$ . After standing for 10 min at room temperature, the solvent  $\text{CHCl}_3$  was removed under reduced pressure and the residue was purified by column chromatography on silica gel (PE:EA = 1:10) to afford compound **7** (254.0 mg, 89%).

A solution of KOH (6.34 mmol) in 5 mL of water was added dropwise to **7** (0.2 mmol) in 10 mL of THF. After 5 h at room temperature, the mixture was extracted with EA. The combined organic layers were dried with anhydrous  $\text{Na}_2\text{SO}_4$  and concentrated in *vacuo*. The crude product was purified by column chromatography on silica gel (PE:EA = 4:1) to afford **8**.

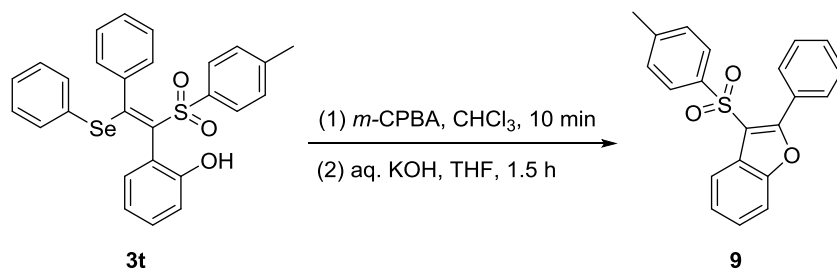

*m*-CPBA (1.2 mmol, 2.4 equiv.) was dissolved in 5 mL of  $\text{CHCl}_3$  and added to a solution of **3t** (0.5 mmol, 1 equiv.) in 20 mL of  $\text{CHCl}_3$ . After standing for 10 min at room temperature, the solvent was removed under reduced pressure to afford a residue. Then the residue was dissolved by 20 mL of THF and 5 mL of 1 M aqueous KOH solution was added dropwise. After 1.5 h at room temperature, the mixture was extracted with EA. The combined organic layers were dried with anhydrous  $\text{Na}_2\text{SO}_4$  and concentrated in *vacuo*. The crude product was purified by column chromatography on silica gel (PE:EA = 15:1) to afford **9** (132.0 mg, 76%).

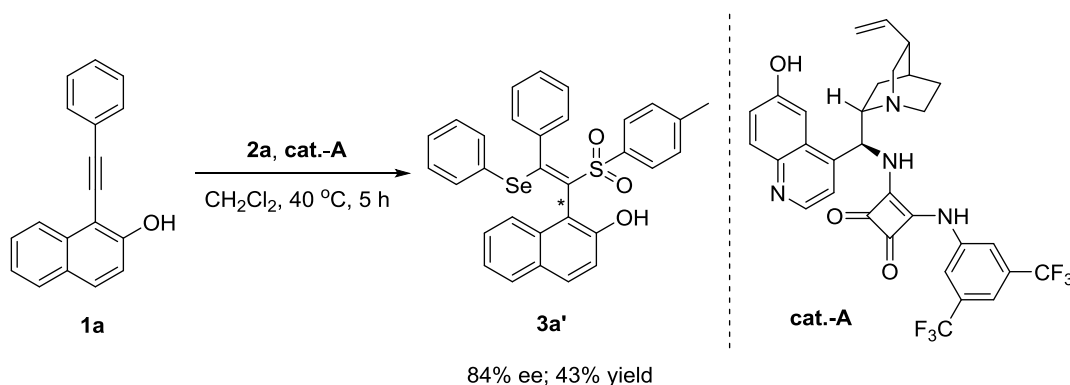

The substrate **1a** (0.1 mmol), selenosulfonate **2a** (0.1 mmol) and **cat.-A** (10 mol%) were added to a 10 mL flame-dried schlenk tube with a magnetic stirring bar.  $\text{CH}_2\text{Cl}_2$  (1.0 mL) was injected into the tube. After stirring at 40 °C for 5 h, the mixture was evaporated and purified by column chromatography on silica gel (PE:EA = 4:1) to afford the product **3a'**.

#### X. $^1\text{H}$ , $^{13}\text{C}$ NMR and HRMS data of compounds (**1t**, **1u**, **3a-3u**, **4a-4n**, **7**, **8**, **9**)

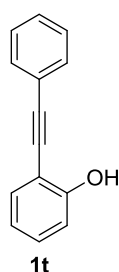

$^1\text{H}$  NMR (600 MHz,  $\text{CDCl}_3$ ):  $\delta$  7.55 – 7.51 (m, 2H), 7.42 (d,  $J$  = 7.6 Hz, 1H), 7.37 – 7.34 (m, 3H), 7.26 (t,  $J$  = 7.8 Hz, 1H), 6.98 (d,  $J$  = 8.2 Hz, 1H), 6.90 (t,  $J$  = 7.5 Hz, 1H), 5.86 (s, 1H).

$^{13}\text{C}$  NMR (150 MHz,  $\text{CDCl}_3$ ):  $\delta$  156.44, 131.63, 131.54, 130.43, 128.75, 128.43, 122.32, 120.38, 114.70, 109.54, 96.31, 83.01.

HRMS (ESI)  $m/z$  Calcd for  $[\text{C}_{14}\text{H}_{10}\text{NaO}, \text{M} + \text{Na}]^+$ : 217.0624, Found: 217.0620.

**Physical properties:** yellow solid; **Yield:** 95%, 1.84 g; **M. p.** 70–71 °C

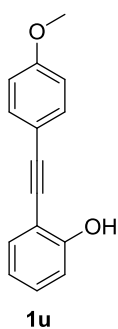

**$^1\text{H}$  NMR** (600 MHz,  $\text{CDCl}_3$ ):  $\delta$  7.44 (d,  $J$  = 8.3 Hz, 2H), 7.39 (d,  $J$  = 7.4 Hz, 1H), 7.22 (t,  $J$  = 7.9 Hz, 1H), 6.96 (d,  $J$  = 8.2 Hz, 1H), 6.89 – 6.83 (m, 3H), 5.93 (s, 1H), 3.78 (s, 3H).

**$^{13}\text{C}$  NMR** (150 MHz,  $\text{CDCl}_3$ ):  $\delta$  159.92, 156.30, 133.02, 131.48, 130.06, 120.29, 114.58, 114.33, 114.05, 109.87, 96.32, 81.66, 55.21.

**HRMS (ESI)**  $m/z$  Calcd for  $[\text{C}_{15}\text{H}_{12}\text{NaO}_2, \text{M} + \text{Na}]^+$ : 247.0730, Found: 247.0724.

**Physical properties:** yellow solid; **Yield:** 90%, 1.75 g; **M. p.** 67–68 °C

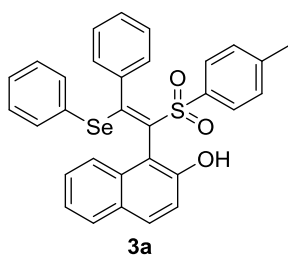

**$^1\text{H}$  NMR** (400 MHz,  $\text{CDCl}_3$ ):  $\delta$  7.82 (d,  $J$  = 8.9 Hz, 1H), 7.73 (d,  $J$  = 7.2 Hz, 1H), 7.49 (t,  $J$  = 8.3 Hz, 1H), 7.38 – 7.24 (m, 6H), 7.14 – 6.96 (m, 8H), 6.93 – 6.84 (m, 4H), 2.19 (s, 3H).

**$^{13}\text{C}$  NMR** (100 MHz,  $\text{CDCl}_3$ ): 160.15, 153.19, 144.00, 137.11, 135.87, 135.77, 135.11, 132.19, 132.12, 130.41, 130.27, 128.96, 128.87, 128.58, 128.49, 128.30, 127.86, 127.14, 127.01, 123.55, 122.95, 119.32, 114.29, 21.38.

**HRMS (ESI)**  $m/z$  Calcd for  $[\text{C}_{31}\text{H}_{24}\text{NaO}_3\text{SSe}, \text{M} + \text{Na}]^+$ : 579.0504, Found: 579.0508.

**Physical properties:** white solid; **Yield:** 85%, 94.4 mg; **M. p.** 171–173 °C

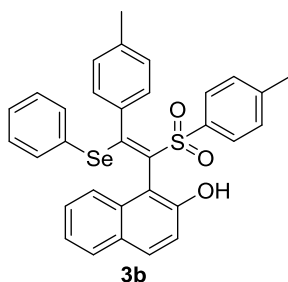

**$^1\text{H}$  NMR** (400 MHz,  $\text{CDCl}_3$ ):  $\delta$  7.81 (d,  $J$  = 8.9 Hz, 1H), 7.71 (d,  $J$  = 7.5 Hz, 1H), 7.46 (d,  $J$  = 7.9 Hz, 1H), 7.36 – 7.23 (m, 6H), 7.09 – 6.97 (m, 5H), 6.94 – 6.83 (m, 6H), 2.23 (s, 3H), 2.18 (s, 3H).

**$^{13}\text{C}$  NMR** (100 MHz,  $\text{CDCl}_3$ ):  $\delta$  160.55, 153.12, 143.95, 137.82, 136.99, 135.79, 132.22, 132.06, 130.11, 128.92, 128.78, 128.50, 128.45, 128.26, 127.81, 127.18, 126.95, 123.52, 123.00, 119.28, 114.43, 21.37, 21.28.

**HRMS (ESI)**  $m/z$  Calcd for  $[\text{C}_{32}\text{H}_{26}\text{NaO}_3\text{SSe}, \text{M} + \text{Na}]^+$ : 593.0660, Found: 593.0658.

**Physical properties:** white solid; **Yield:** 44%, 50.1 mg; **M. p.** 188–190 °C

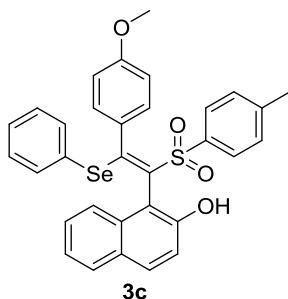

**$^1\text{H}$  NMR** (400 MHz,  $\text{CDCl}_3$ ):  $\delta$  7.81 (d,  $J$  = 8.9 Hz, 1H), 7.72 (d,  $J$  = 7.6 Hz, 1H), 7.50 (d,  $J$  = 8.1 Hz, 1H), 7.35 – 7.24 (m, 6H), 7.12 – 6.97 (m, 5H), 6.97 – 6.85 (m, 4H), 6.62 (d,  $J$  = 8.5 Hz, 2H), 3.73 (s, 3H), 2.19 (s, 3H).

**$^{13}\text{C}$  NMR** (100 MHz,  $\text{CDCl}_3$ ):  $\delta$  160.23, 159.35, 153.04, 143.89, 136.91, 136.01, 132.29, 132.04, 130.53, 130.22, 128.94, 128.79, 128.47, 128.44, 128.34, 128.27, 127.48, 127.38, 126.99, 123.55, 123.08, 119.20, 114.61, 112.66, 55.18, 21.37.

**HRMS (ESI)**  $m/z$  Calcd for  $[\text{C}_{32}\text{H}_{26}\text{NaO}_4\text{SSe}, \text{M} + \text{Na}]^+$ : 609.0609, Found: 609.0613.

**Physical properties:** white solid; **Yield:** 76%, 89.0 mg; **M. p.** 189–190 °C

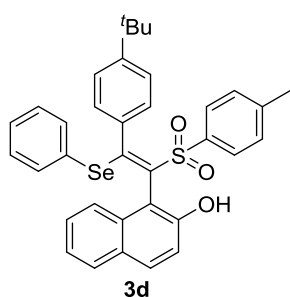

**<sup>1</sup>H NMR** (400 MHz, CDCl<sub>3</sub>): δ 7.83 (d, *J* = 8.9 Hz, 1H), 7.75 (d, *J* = 7.8 Hz, 1H), 7.59 (d, *J* = 8.3 Hz, 1H), 7.40 – 7.23 (m, 6H), 7.02 (t, 3H), 6.98 – 6.89 (m, 4H), 6.85 (q, 4H), 2.20 (s, 3H), 1.21 (s, 9H).

**<sup>13</sup>C NMR** (100 MHz, CDCl<sub>3</sub>): δ 160.70, 153.11, 150.88, 143.75, 137.15, 136.19, 132.27, 132.07, 131.93, 130.17, 129.02, 128.81, 128.47, 128.31, 128.29, 128.12, 127.34, 127.06, 123.98, 123.59, 123.14, 119.20, 114.25, 34.39, 31.20, 21.39.

**HRMS (ESI)** *m/z* Calcd for [C<sub>35</sub>H<sub>32</sub>NaO<sub>3</sub>SSe, M + Na]<sup>+</sup>: 635.1130,

Found: 635.1126.

**Physical properties:** white solid; **Yield:** 53%, 61.4 mg; **M. p.** 212–213 °C

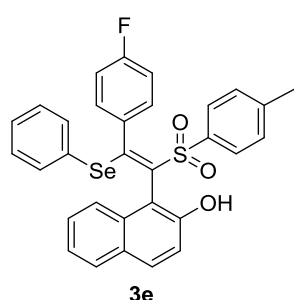

**<sup>1</sup>H NMR** (400 MHz, CDCl<sub>3</sub>): 7.81 (d, *J* = 8.9 Hz, 1H), 7.73 (d, *J* = 7.4 Hz, 1H), 7.47 (d, *J* = 8.0 Hz, 1H), 7.36 – 7.26 (m, 6H), 7.12 – 7.05 (m, 3H), 7.02 (d, *J* = 7.1 Hz, 2H), 6.98 – 6.86 (m, 4H), 6.78 (t, *J* = 8.3 Hz, 2H), 2.20 (s, 3H).

**<sup>13</sup>C NMR** (100 MHz, CDCl<sub>3</sub>): δ 162.20 (d, *J* = 258.0 Hz), 158.78, 153.13, 144.17, 137.09, 135.74, 132.20, 132.10, 131.21, 131.18, 128.95, 128.90, 128.82, 128.51, 128.43, 128.34, 127.07, 126.90, 123.61, 122.86, 119.28, 114.40, 114.18, 21.39.

**HRMS (ESI)** *m/z* Calcd for [C<sub>31</sub>H<sub>23</sub>FNao<sub>3</sub>SSe, M + Na]<sup>+</sup>: 597.0409, Found: 597.0412.

**Physical properties:** white solid; **Yield:** 81%, 92.9 mg; **M. p.** 182–184 °C

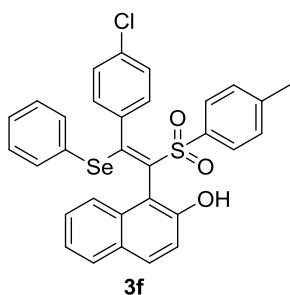

**<sup>1</sup>H NMR** (400 MHz, CDCl<sub>3</sub>): δ 7.82 (d, *J* = 8.9 Hz, 1H), 7.73 (q, *J* = 9.2 Hz, 1H), 7.44 (d, *J* = 8.1 Hz, 1H), 7.41 – 7.20 (m, 7H), 7.16 – 7.00 (m, 6H), 6.99 – 6.84 (m, 4H), 2.20 (s, 3H).

**<sup>13</sup>C NMR** (100 MHz, CDCl<sub>3</sub>): δ 158.40, 158.40, 153.13, 144.75, 144.29, 137.11, 135.52, 133.93, 133.75, 132.26, 132.06, 131.15, 128.94, 128.58, 128.49, 128.35, 128.26, 127.41, 127.08, 126.69, 123.63, 122.78, 119.34, 118.98, 114.09, 21.42.

**HRMS (ESI)** *m/z* Calcd for [C<sub>31</sub>H<sub>23</sub>ClNaO<sub>3</sub>SSe, M + Na]<sup>+</sup>: 613.0114, Found: 613.0118.

**Physical properties:** white solid; **Yield:** 47%, 55.5 mg; **M. p.** 171–172 °C

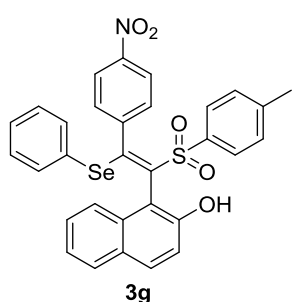

**<sup>1</sup>H NMR** (400 MHz, CDCl<sub>3</sub>): δ 7.99 (s, 2H), 7.85 (d, *J* = 8.5 Hz, 1H), 7.78 – 7.70 (m, 1H), 7.40 (s, 1H), 7.36 – 7.22 (m, 8H), 7.14 – 7.00 (m, 3H), 6.99 – 6.84 (m, 4H), 2.21 (s, 3H).

**<sup>13</sup>C NMR** (100 MHz, CDCl<sub>3</sub>): δ 156.40, 153.25, 146.83, 144.79, 142.40, 137.25, 134.74, 132.54, 131.83, 131.57, 129.42, 129.11, 128.95, 128.84, 128.56, 128.44, 127.18, 125.95, 123.74, 122.43, 119.53, 113.54, 21.43.

**HRMS (ESI)**  $m/z$  Calcd for  $[C_{31}H_{23}NNaO_5SSe, M + Na]^+$ : 624.0354, Found: 624.0355.

**Physical properties:** yellow solid; **Yield:** 61%, 73.3 mg; **M. p.** 120–123 °C

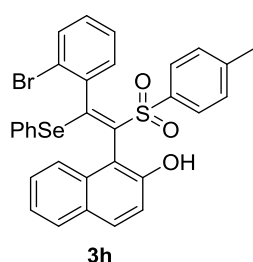

**$^1H$  NMR** (400 MHz,  $CDCl_3$ ):  $\delta$  7.85 (d,  $J$  = 8.9 Hz, 1H), 7.73 – 7.61 (m, 3H), 7.43 – 7.28 (m, 4H), 7.26 – 7.15 (m, 5H), 7.15 – 7.07 (m, 2H), 6.94 (t,  $J$  = 7.5 Hz, 3H), 6.87 (d,  $J$  = 8.0 Hz, 2H), 2.16 (s, 3H).

**$^{13}C$  NMR** (100 MHz,  $CDCl_3$ ):  $\delta$  158.79, 153.18, 144.45, 137.58, 136.00, 134.24, 132.40, 132.33, 131.90, 131.10, 129.62, 129.28, 129.07, 128.97, 128.80, 128.24, 127.97, 126.72, 126.45, 125.86, 123.62, 123.58, 121.32, 119.71, 113.73, 21.38.

**HRMS (ESI)**  $m/z$  Calcd for  $[C_{31}H_{23}BrNaO_3SSe, M + Na]^+$ : 656.9609, Found: 656.9614.

**Physical properties:** white solid; **Yield:** 47%, 59.6 mg; **M. p.** 175–177 °C

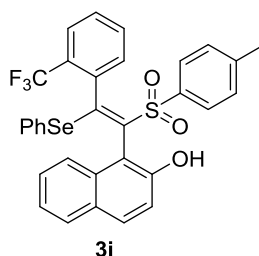

**$^1H$  NMR** (400 MHz,  $CDCl_3$ ):  $\delta$  7.85 (d,  $J$  = 9.4 Hz, 2H), 7.67 (d,  $J$  = 7.6 Hz, 1H), 7.45 (d,  $J$  = 7.8 Hz, 1H), 7.36 (t,  $J$  = 8.9 Hz, 2H), 7.34 – 7.26 (m, 4H), 7.26 – 7.15 (m, 3H), 7.09 (t,  $J$  = 8.3 Hz, 3H), 6.93 (t,  $J$  = 7.5 Hz, 2H), 6.84 (d,  $J$  = 8.0 Hz, 2H), 2.13 (s, 3H).

**$^{13}C$  NMR** (100 MHz,  $CDCl_3$ ):  $\delta$  156.55, 153.12, 144.52, 137.77, 133.98, 133.25, 132.53, 132.47, 131.27, 130.84, 129.95, 129.11, 129.01, 128.83, 128.76, 128.34, 128.22, 127.93, 126.93, 126.18 (q,  $J$  = 30.0 Hz), 126.15 (q,  $J$  = 5.0 Hz), 125.90, 124.06 (q,  $J$  = 272.0 Hz), 123.64, 122.78, 122.77, 119.80, 113.90, 21.34.

**HRMS (ESI)**  $m/z$  Calcd for  $[C_{32}H_{23}F_3NaO_3SSe, M + Na]^+$ : 647.0377, Found: 647.0374.

**Physical properties:** white solid; **Yield:** 30%, 37.4 mg; **M. p.** 201–204 °C

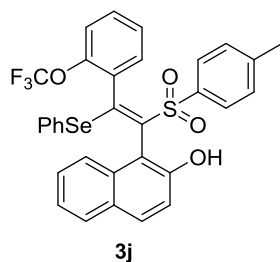

**$^1H$  NMR** (400 MHz,  $CDCl_3$ ):  $\delta$  7.84 (d,  $J$  = 8.9 Hz, 1H), 7.68 (d,  $J$  = 10.0 Hz, 2H), 7.43 (d,  $J$  = 8.3 Hz, 1H), 7.34 (d,  $J$  = 8.9 Hz, 1H), 7.29 (d,  $J$  = 8.0 Hz, 2H), 7.24 – 7.19 (m, 1H), 7.19 – 7.06 (m, 6H), 7.05 – 6.98 (m, 2H), 6.94 (t,  $J$  = 7.5 Hz, 2H), 6.86 (d,  $J$  = 7.9 Hz, 2H), 2.16 (s, 3H).

**$^{13}C$  NMR** (100 MHz,  $CDCl_3$ ):  $\delta$  154.24, 153.36, 144.79, 144.53, 137.35, 134.12, 132.41, 132.04, 131.26, 130.69, 129.51, 129.09, 128.85, 128.82, 128.75, 128.41, 127.94, 126.75, 126.39, 126.08, 124.56, 123.60, 123.16, 120.56 (q,  $J$  = 258.0 Hz), 119.62, 115.77, 113.71, 21.35.

**HRMS (ESI)**  $m/z$  Calcd for  $[C_{32}H_{23}F_3NaO_4SSe, M + Na]^+$ : 663.0327, Found: 663.0330.

**Physical properties:** white solid; **Yield:** 55%, 70.4 mg; **M. p.** 161–163 °C

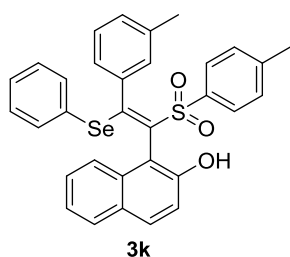

**$^1H$  NMR** (400 MHz,  $CDCl_3$ ):  $\delta$  7.81 (d,  $J$  = 8.9 Hz, 1H), 7.74 (d,  $J$  = 7.9 Hz, 1H), 7.59 – 7.50 (m, 1H), 7.39 – 7.25 (m, 6H), 7.09 – 6.93 (m, 5H), 6.93 – 6.79 (m, 5H), 6.67 (s, 1H), 2.20 (s, 3H), 2.11 (s, 3H).

**$^{13}\text{C}$  NMR** (100 MHz,  $\text{CDCl}_3$ ):  $\delta$  160.21, 153.21, 143.80, 137.11, 136.55, 136.20, 134.73, 132.04, 130.34, 128.97, 128.82, 128.55, 128.46, 128.29, 128.08, 127.17, 127.04, 123.54, 123.08, 119.20, 114.21, 21.37, 21.02.

**HRMS (ESI)**  $m/z$  Calcd for  $[\text{C}_{32}\text{H}_{26}\text{NaO}_3\text{SSe}, \text{M} + \text{Na}]^+$ : 593.0660, Found: 593.0657.

**Physical properties:** white solid; **Yield:** 51%, 56.7 mg; **M. p.** 175–178 °C

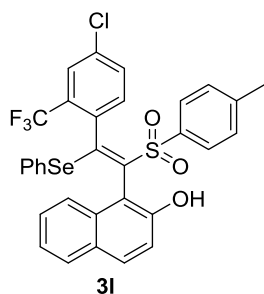

**$^1\text{H}$  NMR** (400 MHz,  $\text{CDCl}_3$ ):  $\delta$  7.88 – 7.79 (m, 2H), 7.67 (d,  $J$  = 7.7 Hz, 1H), 7.43 (s, 1H), 7.38 – 7.31 (m, 2H), 7.31 – 7.07 (m, 9H), 6.97 (t,  $J$  = 7.4 Hz, 2H), 6.85 (d,  $J$  = 7.8 Hz, 2H), 2.13 (s, 3H).

**$^{13}\text{C}$  NMR** (100 MHz,  $\text{CDCl}_3$ ):  $\delta$  155.00, 153.04, 144.72, 137.74, 134.31, 133.74, 132.63, 132.55, 132.37, 131.97, 130.94, 130.79, 129.44, 128.99, 128.90, 128.75, 128.60, 127.99, 127.63 (q,  $J$  = 31.0 Hz), 126.99, 126.48 (q,  $J$  = 5.0 Hz), 125.62, 123.70, 123.20 (q,  $J$  = 273.0 Hz),

122.59, 119.82, 113.73, 21.35.

**HRMS (ESI)**  $m/z$  Calcd for  $[\text{C}_{32}\text{H}_{22}\text{ClF}_3\text{NaO}_3\text{SSe}, \text{M} + \text{Na}]^+$ : 680.9988, Found: 680.9989.

**Physical properties:** white solid; **Yield:** 31%, 40.8 mg; **M. p.** 182–184 °C

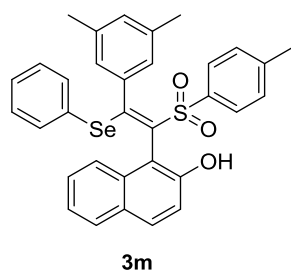

**$^1\text{H}$  NMR** (400 MHz,  $\text{CDCl}_3$ ):  $\delta$  7.80 (d,  $J$  = 8.9 Hz, 1H), 7.76 (d,  $J$  = 8.0 Hz, 1H), 7.62 (d,  $J$  = 8.4 Hz, 1H), 7.44 – 7.37 (m, 1H), 7.36 – 7.24 (m, 5H), 7.04 (t,  $J$  = 7.3 Hz, 1H), 7.01 – 6.95 (m, 2H), 6.91 (d,  $J$  = 7.8 Hz, 4H), 6.63 (s, 1H), 6.57 (s, 2H), 2.22 (s, 3H), 2.12 (s, 3H), 2.08 (s, 3H).

**$^{13}\text{C}$  NMR** (100 MHz,  $\text{CDCl}_3$ ): 160.28, 153.24, 143.62, 137.11, 136.57, 136.40, 134.46, 132.36, 131.94, 130.42, 129.17, 128.97, 128.75, 128.50, 128.45, 128.29, 127.87, 127.29, 127.06, 125.90, 123.52, 123.19, 119.12, 114.17, 21.35, 20.92.

**HRMS (ESI)**  $m/z$  Calcd for  $[\text{C}_{33}\text{H}_{28}\text{NaO}_3\text{SSe}, \text{M} + \text{Na}]^+$ : 607.0817, Found: 607.0818.

**Physical properties:** white solid; **Yield:** 43%, 50.2 mg; **M. p.** 192–193 °C

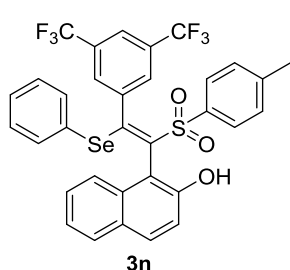

**$^1\text{H}$  NMR** (400 MHz,  $\text{CDCl}_3$ ):  $\delta$  7.81 (t,  $J$  = 7.8 Hz, 2H), 7.57 – 7.50 (m, 2H), 7.44 (t,  $J$  = 7.2 Hz, 2H), 7.40 – 7.30 (m, 5H), 7.22 (d,  $J$  = 8.9 Hz, 1H), 7.08 (t,  $J$  = 7.2 Hz, 1H), 7.00 – 6.89 (m, 6H), 2.25 (s, 3H).

**$^{13}\text{C}$  NMR** (100 MHz,  $\text{CDCl}_3$ ):  $\delta$  154.88, 153.39, 144.80, 137.39, 137.27, 135.91, 133.70, 132.44, 131.96, 130.46 (q,  $J$  = 33.0 Hz), 129.36, 129.29, 129.03, 128.88, 128.55, 128.26, 127.48, 126.18, 123.82, 123.29 (q,  $J$  = 270.0 Hz), 122.71, 121.13 (t,  $J$  = 4.0 Hz), 118.75, 113.32, 21.39.

**HRMS (ESI)**  $m/z$  Calcd for  $[\text{C}_{33}\text{H}_{22}\text{F}_6\text{NaO}_3\text{SSe}, \text{M} + \text{Na}]^+$ : 715.0251, Found: 715.0249.

**Physical properties:** white solid; **Yield:** 46%, 63.6 mg; **M. p.** 179–182 °C

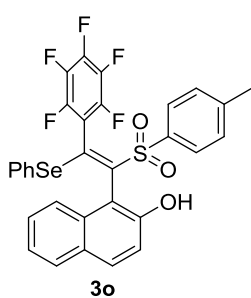

**$^1\text{H}$  NMR** (400 MHz,  $\text{CDCl}_3$ ):  $\delta$  7.85 (d,  $J$  = 8.9 Hz, 1H), 7.70 (d,  $J$  = 7.9 Hz, 1H), 7.43 – 7.14 (m, 10H), 7.11 (t,  $J$  = 7.4 Hz, 2H), 6.93 (d,  $J$  = 7.9 Hz, 2H), 2.20 (s, 3H).

**$^{13}\text{C}$  NMR** (100 MHz,  $\text{CDCl}_3$ ):  $\delta$  153.23, 145.19, 143.37, 137.00, 134.15, 133.54, 132.88, 131.26, 130.16, 129.20, 128.99, 128.83, 128.21, 127.23, 125.57, 123.74, 122.53, 119.49, 112.45, 21.43.

**HRMS (ESI)**  $m/z$  Calcd for  $[\text{C}_{31}\text{H}_{19}\text{F}_5\text{NaO}_3\text{SSe}, \text{M} + \text{Na}]^+$ : 669.0032,

Found: 669.0030.

**Physical properties:** white solid; **Yield:** 61%, 78.8 mg; **M. p.** 211–213  $^\circ\text{C}$

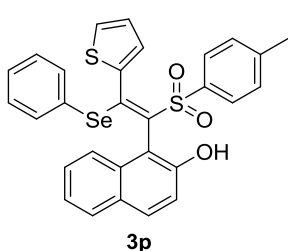

**$^1\text{H}$  NMR** (400 MHz,  $\text{CDCl}_3$ ):  $\delta$  7.77 (d,  $J$  = 8.8 Hz, 1H), 7.72 (d,  $J$  = 7.8 Hz, 1H), 7.56 (d,  $J$  = 8.2 Hz, 1H), 7.45 – 7.34 (m, 3H), 7.33 – 7.26 (m, 2H), 7.25 – 7.20 (m, 1H), 7.16 (d,  $J$  = 4.5 Hz, 1H), 7.15 – 7.06 (m, 3H), 7.03 – 6.93 (m, 3H), 6.90 (d,  $J$  = 7.5 Hz, 2H), 6.77 – 6.70 (m, 1H), 2.19 (s, 3H).

**$^{13}\text{C}$  NMR** (100 MHz,  $\text{CDCl}_3$ ):  $\delta$  152.99, 150.76, 143.93, 136.39, 135.89, 135.38, 134.57, 132.29, 132.04, 130.64, 128.83, 128.58, 128.44, 128.42, 128.29, 128.05, 127.73, 127.18, 126.16, 123.61, 123.16, 119.02, 114.63, 21.40.

**HRMS (ESI)**  $m/z$  Calcd for  $[\text{C}_{29}\text{H}_{22}\text{NaO}_3\text{SSe}, \text{M} + \text{Na}]^+$ : 585.0068, Found: 585.0070.

**Physical properties:** white solid; **Yield:** 46%, 51.7 mg; **M. p.** 97–99  $^\circ\text{C}$

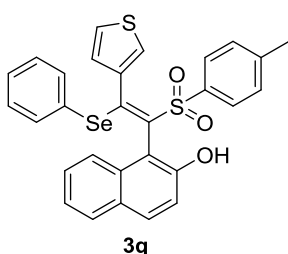

**$^1\text{H}$  NMR** (400 MHz,  $\text{CDCl}_3$ ):  $\delta$  7.75 (dd,  $J$  = 8.1, 4.6 Hz, 2H), 7.66 (d,  $J$  = 8.3 Hz, 1H), 7.39 (d,  $J$  = 8.0 Hz, 3H), 7.31 (t,  $J$  = 7.4 Hz, 1H), 7.25 (d,  $J$  = 6.3 Hz, 1H), 7.20 (d,  $J$  = 8.9 Hz, 1H), 7.16 – 7.00 (m, 4H), 7.01 – 6.84 (m, 5H), 6.67 (d,  $J$  = 4.8 Hz, 1H), 2.21 (s, 3H).

**$^{13}\text{C}$  NMR** (100 MHz,  $\text{CDCl}_3$ ):  $\delta$  154.16, 153.04, 143.73, 136.56, 136.51, 134.52, 132.63, 132.27, 131.97, 128.93, 128.84, 128.49, 128.42, 128.38, 128.32, 128.17, 127.45, 127.15, 125.97, 124.15, 123.59, 123.25, 118.96, 114.31, 21.40.

**HRMS (ESI)**  $m/z$  Calcd for  $[\text{C}_{29}\text{H}_{22}\text{NaO}_3\text{SSe}, \text{M} + \text{Na}]^+$ : 585.0068, Found: 585.0071.

**Physical properties:** white solid; **Yield:** 62%, 69.6 mg; **M. p.** 188–189  $^\circ\text{C}$

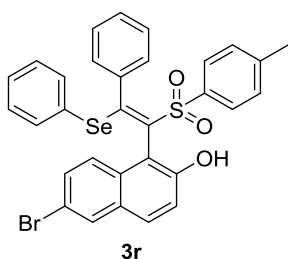

**$^1\text{H}$  NMR** (400 MHz,  $\text{CDCl}_3$ ):  $\delta$  7.89 (s, 1H), 7.69 (d,  $J$  = 8.9 Hz, 1H), 7.52 (s, 1H), 7.46 – 7.38 (m, 2H), 7.32 – 7.23 (m, 3H), 7.15 – 7.00 (m, 6H), 6.99 (d,  $J$  = 7.5 Hz, 2H), 6.95 – 6.80 (m, 4H), 2.23 (s, 3H).

**$^{13}\text{C}$  NMR** (100 MHz,  $\text{CDCl}_3$ ):  $\delta$  160.42, 153.67, 144.17, 137.04, 135.91, 134.80, 131.04, 130.84, 130.25, 130.22, 130.11, 130.04, 129.01, 128.66, 128.38, 128.35, 127.91, 127.13, 126.80, 124.86, 120.48, 117.22, 114.41, 21.45.

**HRMS (ESI)**  $m/z$  Calcd for  $[C_{31}H_{23}BrNaO_3SSe, M + Na]^+$ : 656.9609, Found: 656.9607.

**Physical properties:** white solid; **Yield:** 76%, 94.4 mg; **M. p.** 172–175 °C

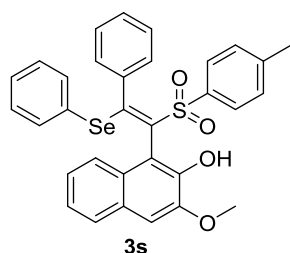

**3s**

**$^1H$  NMR** (400 MHz,  $CDCl_3$ ):  $\delta$  8.07 (d,  $J$  = 8.3 Hz, 1H), 7.75 (d,  $J$  = 8.0 Hz, 1H), 7.47 (t, 1H), 7.40 (t,  $J$  = 7.4 Hz, 1H), 7.32 (d,  $J$  = 7.7 Hz, 2H), 7.25 (s, 2H), 7.07 – 6.94 (m, 5H), 6.94 – 6.78 (m, 6H), 6.56 (s, 1H), 4.06 (s, 3H), 2.28 (s, 3H).

**$^{13}C$  NMR** (100 MHz,  $CDCl_3$ ):  $\delta$  157.06, 146.81, 144.91, 142.92, 138.53, 136.94, 134.93, 133.52, 129.46, 129.00, 128.54, 128.33, 128.23, 128.21, 127.80, 127.52, 127.35, 127.08, 126.81, 125.34, 124.40, 123.94, 114.54, 107.61, 55.99, 21.46.

**HRMS (ESI)**  $m/z$  Calcd for  $[C_{32}H_{26}NaO_4SSe, M + Na]^+$ : 609.0609, Found: 609.0605.

**Physical properties:** white solid; **Yield:** 72%, 84.3 mg; **M. p.** 171–172 °C

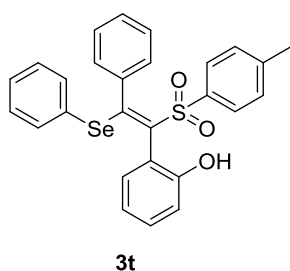

**3t**

**$^1H$  NMR** (600 MHz,  $CDCl_3$ ):  $\delta$  7.48 (s, 4H), 7.40 (s, 1H), 7.26 (d,  $J$  = 8.4 Hz, 2H), 7.13 (d,  $J$  = 7.7 Hz, 2H), 7.10 – 7.05 (m, 3H), 6.95 – 6.88 (m, 3H), 6.58 (d,  $J$  = 8.1 Hz, 1H), 6.54 (d,  $J$  = 7.5 Hz, 1H), 6.50 (t,  $J$  = 7.4 Hz, 1H), 5.62 (s, 1H), 2.35 (s, 3H).

**$^{13}C$  NMR** (150 MHz,  $CDCl_3$ ):  $\delta$  151.88, 151.78, 143.78, 139.38, 137.47, 136.91, 134.33, 129.88, 129.79, 129.59, 129.11, 128.86, 128.77, 128.30, 128.12, 127.13, 123.62, 119.96, 116.95, 21.55.

**HRMS (ESI)**  $m/z$  Calcd for  $[C_{27}H_{22}NaO_3SSe, M + Na]^+$ : 529.0347, Found: 529.0351.

**Physical properties:** white solid; **Yield:** 20%, 101.2 mg; **M. p.** 76–78 °C

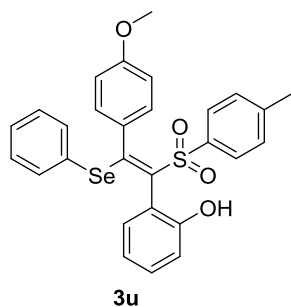

**3u**

**$^1H$  NMR** (600 MHz,  $CDCl_3$ ):  $\delta$  7.42 – 7.29 (m, 2H), 7.27 – 7.23 (m, 2H), 7.13 (d,  $J$  = 7.6 Hz, 2H), 7.07 (t,  $J$  = 7.2 Hz, 3H), 7.00 (d,  $J$  = 8.3 Hz, 2H), 6.92 (dt,  $J$  = 18.7, 7.1 Hz, 3H), 6.59 (d,  $J$  = 8.1 Hz, 1H), 6.50 (q,  $J$  = 7.7 Hz, 2H), 5.52 (s, 1H), 3.88 (s, 3H), 2.35 (s, 3H).

**$^{13}C$  NMR** (150 MHz,  $CDCl_3$ ):  $\delta$  160.54, 151.99, 151.75, 143.68, 139.20, 137.59, 136.92, 131.83, 129.86, 129.79, 129.10, 128.75, 128.30, 128.07, 127.27, 126.30, 123.78, 120.01, 116.99, 114.32, 55.30, 21.56.

**HRMS (ESI)**  $m/z$  Calcd for  $[C_{28}H_{24}NaO_4SSe, M + Na]^+$ : 559.0453, Found: 559.0449.

**Physical properties:** white solid; **Yield:** 26%, 139.3 mg; **M. p.** 183–184 °C

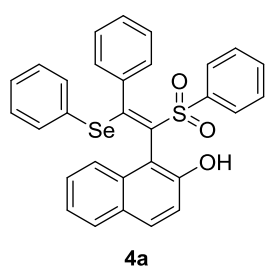

**4a**

**$^1H$  NMR** (400 MHz,  $CDCl_3$ ):  $\delta$  7.79 (d,  $J$  = 8.9 Hz, 1H), 7.73 (d,  $J$  = 7.9 Hz, 1H), 7.55 (d,  $J$  = 8.3 Hz, 1H), 7.50 – 7.38 (m, 3H), 7.34 (t,  $J$  = 7.5 Hz, 1H), 7.30 – 7.22 (m, 3H), 7.18 – 6.94 (m, 10H), 6.89 (t,  $J$  = 7.5 Hz, 2H).

**$^{13}\text{C}$  NMR** (100 MHz,  $\text{CDCl}_3$ ):  $\delta$  160.49, 153.27, 138.97, 137.06, 134.97, 132.92, 132.16, 130.32, 128.93, 128.58, 128.38, 128.31, 128.22, 127.89, 127.17, 127.11, 126.96, 123.60, 122.89, 119.21, 114.02.

**HRMS (ESI)**  $m/z$  Calcd for  $[\text{C}_{30}\text{H}_{22}\text{NaO}_3\text{SSe}, \text{M} + \text{Na}]^+$ : 565.0347, Found: 565.0349.

**Physical properties:** white solid; **Yield:** 59%, 63.9 mg; **M. p.** 121–123 °C

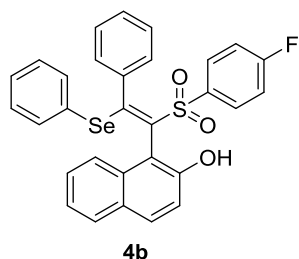

**$^1\text{H}$  NMR** (400 MHz,  $\text{CDCl}_3$ ):  $\delta$  7.81 (d,  $J$  = 8.9 Hz, 1H), 7.76 (d,  $J$  = 8.0 Hz, 1H), 7.63 – 7.57 (m, 1H), 7.48 – 7.37 (m, 3H), 7.36 – 7.28 (m, 2H), 7.25 (d,  $J$  = 8.5 Hz, 1H), 7.18 – 6.95 (m, 8H), 6.90 (t,  $J$  = 7.6 Hz, 2H), 6.75 (t,  $J$  = 8.4 Hz, 2H).

**$^{13}\text{C}$  NMR** (100 MHz,  $\text{CDCl}_3$ ):  $\delta$  165.20 (d,  $J$  = 254.0 Hz), 160.49, 153.24, 137.04, 135.32 (d,  $J$  = 2.0 Hz), 134.89, 132.24, 132.11, 131.21, 131.11, 130.51, 128.95, 128.63, 128.48, 128.34, 127.98, 127.32, 127.20, 126.90, 123.76, 122.84, 119.06, 115.43 (d,  $J$  = 22.0 Hz), 113.81.

**HRMS (ESI)**  $m/z$  Calcd for  $[\text{C}_{30}\text{H}_{21}\text{FNaO}_3\text{SSe}, \text{M} + \text{Na}]^+$ : 583.0253, Found: 583.0250.

**Physical properties:** white solid; **Yield:** 64%, 71.6 mg; **M. p.** 158–159 °C

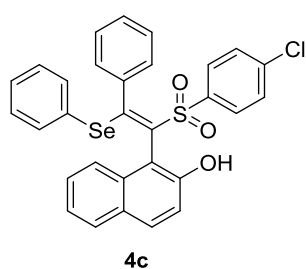

**$^1\text{H}$  NMR** (400 MHz,  $\text{CDCl}_3$ ):  $\delta$  7.82 (d,  $J$  = 8.9 Hz, 1H), 7.77 (d,  $J$  = 8.0 Hz, 1H), 7.60 (d,  $J$  = 8.4 Hz, 1H), 7.41 (t,  $J$  = 7.6 Hz, 1H), 7.38 – 7.30 (m, 3H), 7.27 – 7.23 (m, 1H), 7.18 (s, 1H), 7.13 – 7.03 (m, 7H), 7.01 (d,  $J$  = 7.7 Hz, 3H), 6.90 (t,  $J$  = 7.5 Hz, 2H).

**$^{13}\text{C}$  NMR** (100 MHz,  $\text{CDCl}_3$ ):  $\delta$  161.00, 153.20, 139.58, 137.82, 137.07, 134.85, 132.33, 132.10, 130.27, 129.79, 129.01, 128.68, 128.52, 128.46, 128.38, 128.05, 127.38, 127.22, 126.88, 123.82, 122.84, 119.07, 113.75.

**HRMS (ESI)**  $m/z$  Calcd for  $[\text{C}_{30}\text{H}_{21}\text{ClNaO}_3\text{SSe}, \text{M} + \text{Na}]^+$ : 598.9957, Found: 598.9960.

**Physical properties:** white solid; **Yield:** 76%, 87.6 mg; **M. p.** 166–169 °C

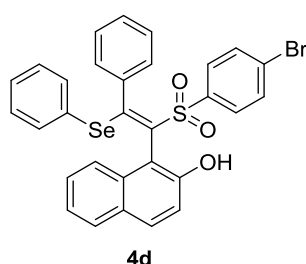

**$^1\text{H}$  NMR** (400 MHz,  $\text{CDCl}_3$ ):  $\delta$  7.79 (t,  $J$  = 7.7 Hz, 2H), 7.66 (d,  $J$  = 8.4 Hz, 1H), 7.44 (t,  $J$  = 7.6 Hz, 1H), 7.35 (t,  $J$  = 7.5 Hz, 1H), 7.32 – 7.26 (m, 3H), 7.25 – 7.19 (m, 3H), 7.13 – 6.92 (m, 8H), 6.88 (t,  $J$  = 7.5 Hz, 2H).

**$^{13}\text{C}$  NMR** (100 MHz,  $\text{CDCl}_3$ ):  $\delta$  160.78, 153.31, 138.66, 137.03, 134.78, 132.24, 132.17, 131.43, 130.64, 129.79, 128.97, 128.63, 128.51, 128.34, 128.10, 127.99, 127.41, 127.17, 126.90, 123.77, 122.91, 118.98, 113.63.

**HRMS (ESI)**  $m/z$  Calcd for  $[\text{C}_{30}\text{H}_{21}\text{BrNaO}_3\text{SSe}, \text{M} + \text{Na}]^+$ : 642.9452, Found: 642.9449.

**Physical properties:** white solid; **Yield:** 70%, 86.9 mg; **M. p.** 110–111 °C

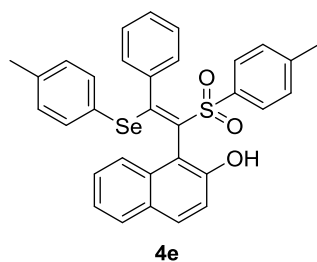

**<sup>1</sup>H NMR** (400 MHz, CDCl<sub>3</sub>): δ 7.79 (d, *J* = 8.9 Hz, 1H), 7.72 (d, *J* = 7.9 Hz, 1H), 7.54 (d, *J* = 8.3 Hz, 1H), 7.45 (s, 1H), 7.36 – 7.23 (m, 5H), 7.07 (s, 5H), 6.86 (d, *J* = 7.6 Hz, 4H), 6.68 (d, *J* = 7.7 Hz, 2H), 2.18 (s, 3H), 2.11 (s, 3H).

**<sup>13</sup>C NMR** (100 MHz, CDCl<sub>3</sub>): δ 160.30, 153.22, 143.84, 138.68, 136.93, 136.03, 135.15, 132.22, 131.98, 130.30, 129.07, 129.07, 128.89, 128.82, 128.40, 128.40, 128.24, 127.74, 127.05, 126.97, 123.48, 123.41, 123.02, 119.19, 114.21, 21.36, 21.04.

**HRMS (ESI)** *m/z* Calcd for [C<sub>32</sub>H<sub>26</sub>NaO<sub>3</sub>SSe, M + Na]<sup>+</sup>: 593.0660, Found: 593.0659.

**Physical properties:** white solid; **Yield:** 56%, 63.8 mg; **M. p.** 179–181 °C

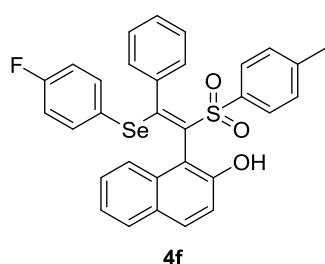

**<sup>1</sup>H NMR** (400 MHz, CDCl<sub>3</sub>): δ 7.79 (d, *J* = 8.9 Hz, 1H), 7.73 (d, *J* = 7.9 Hz, 1H), 7.55 (d, *J* = 8.3 Hz, 1H), 7.48 (s, 1H), 7.38 – 7.26 (m, 4H), 7.24 (s, 1H), 7.19 – 6.99 (m, 5H), 6.99 – 6.92 (m, 2H), 6.88 (d, *J* = 7.9 Hz, 2H), 6.57 (t, *J* = 8.5 Hz, 2H), 2.19 (s, 3H).

**<sup>13</sup>C NMR** (100 MHz, CDCl<sub>3</sub>): δ 162.91 (d, *J* = 248.0 Hz), 159.30, 153.29, 143.93, 139.13, 139.05, 136.01, 134.91, 132.16, 132.07, 131.01, 128.87, 128.39, 128.30, 127.94, 127.21, 127.06, 123.53, 122.91, 121.95 (d, *J* = 3.0 Hz), 119.18, 115.49 (d, *J* = 22.0 Hz), 115.38, 113.97, 21.36.

**HRMS (ESI)** *m/z* Calcd for [C<sub>31</sub>H<sub>23</sub>FNao<sub>3</sub>SSe, M + Na]<sup>+</sup>: 597.0409, Found: 597.0411.

**Physical properties:** white solid; **Yield:** 65%, 74.6 mg; **M. p.** 159–161 °C

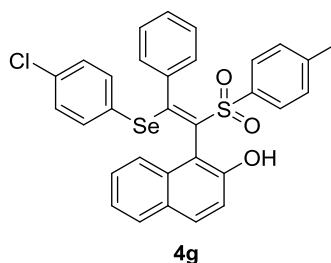

**<sup>1</sup>H NMR** (400 MHz, CDCl<sub>3</sub>): δ 7.79 (d, *J* = 8.9 Hz, 1H), 7.73 (d, *J* = 7.8 Hz, 1H), 7.56 – 7.47 (m, 2H), 7.37 – 7.22 (m, 5H), 7.18 – 7.00 (m, 5H), 6.99 – 6.78 (m, 6H), 2.19 (s, 3H).

**<sup>13</sup>C NMR** (100 MHz, CDCl<sub>3</sub>): δ 158.98, 153.28, 144.02, 138.22, 135.89, 135.19, 134.94, 132.16, 132.14, 131.17, 128.89, 128.48, 128.45, 128.32, 128.12, 127.30, 127.08, 125.22, 123.57, 122.87, 119.24, 114.03, 21.38.

**HRMS (ESI)** *m/z* Calcd for [C<sub>31</sub>H<sub>23</sub>ClNaO<sub>3</sub>SSe, M + Na]<sup>+</sup>: 613.0114, Found: 613.0115.

**Physical properties:** white solid; **Yield:** 75%, 88.5 mg; **M. p.** 158–160 °C

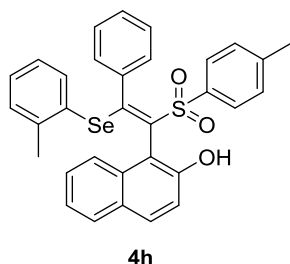

**<sup>1</sup>H NMR** (400 MHz, CDCl<sub>3</sub>): δ 7.80 (d, *J* = 8.9 Hz, 1H), 7.72 (d, *J* = 7.7 Hz, 1H), 7.53 (d, *J* = 8.1 Hz, 1H), 7.40 (s, 1H), 7.34 – 7.22 (m, 5H), 7.15 – 7.01 (m, 6H), 6.96 (t, *J* = 7.6 Hz, 1H), 6.87 (d, *J* = 8.2 Hz, 3H), 6.71 (t, *J* = 7.6 Hz, 1H), 2.18 (s, 3H), 2.16 (s, 3H).

**<sup>13</sup>C NMR** (100 MHz, CDCl<sub>3</sub>): δ 159.95, 153.16, 143.91, 142.74, 138.89, 135.88, 135.28, 132.37, 131.97, 130.95, 129.48, 128.89, 128.83, 128.43, 128.27, 128.03, 127.94, 126.98, 126.93, 125.79, 123.52, 123.02, 119.27, 114.54, 23.21, 21.37.

**HRMS (ESI)**  $m/z$  Calcd for  $[C_{32}H_{26}NaO_3SSe, M + Na]^+$ : 593.0660, Found: 593.0662.

**Physical properties:** white solid; **Yield:** 61%, 69.5 mg; **M. p.** 188–191 °C

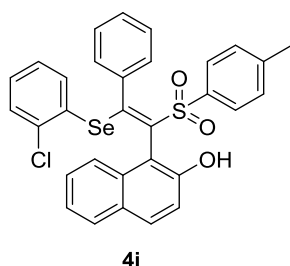

**$^1H$  NMR** (400 MHz,  $CDCl_3$ ):  $\delta$  7.79 (d,  $J$  = 8.8 Hz, 1H), 7.72 (d,  $J$  = 7.8 Hz, 1H), 7.59 (d,  $J$  = 8.2 Hz, 1H), 7.38 (s, 1H), 7.36 – 7.17 (m, 7H), 7.17 – 7.01 (m, 5H), 6.97 (t,  $J$  = 7.7 Hz, 1H), 6.87 (d,  $J$  = 7.9 Hz, 2H), 6.77 (t,  $J$  = 7.5 Hz, 1H), 2.18 (s, 3H).

**$^{13}C$  NMR** (100 MHz,  $CDCl_3$ ):  $\delta$  159.25, 153.23, 143.97, 140.06, 139.59, 135.82, 134.96, 132.25, 132.12, 131.43, 130.57, 129.04, 128.84, 128.44, 128.23, 128.15, 127.79, 127.02, 126.48, 123.60, 123.13, 119.17, 114.11, 21.38.

**HRMS (ESI)**  $m/z$  Calcd for  $[C_{31}H_{23}ClNaO_3SSe, M + Na]^+$ : 613.0114, Found: 613.0113

**Physical properties:** white solid; **Yield:** 66%, 77.9 mg; **M. p.** 197–199 °C

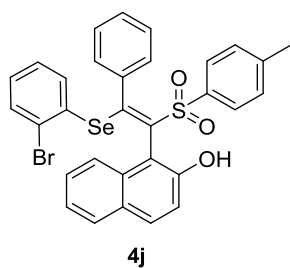

**$^1H$  NMR** (400 MHz,  $CDCl_3$ ):  $\delta$  7.80 (d,  $J$  = 8.9 Hz, 1H), 7.72 (d,  $J$  = 7.7 Hz, 1H), 7.58 (d,  $J$  = 8.0 Hz, 1H), 7.37 – 7.23 (m, 9H), 7.15 (d,  $J$  = 7.6 Hz, 1H), 7.12 – 7.05 (m, 3H), 6.87 (d,  $J$  = 7.9 Hz, 3H), 6.82 (t,  $J$  = 7.5 Hz, 1H), 2.19 (s, 3H).

**$^{13}C$  NMR** (100 MHz,  $CDCl_3$ ):  $\delta$  159.42, 153.18, 144.03, 139.59, 135.75, 134.97, 132.42, 132.29, 132.16, 131.72, 131.32, 130.51, 130.28, 128.90, 128.85, 128.49, 128.25, 128.21, 127.12, 127.06, 127.00, 123.61, 123.19, 119.23, 114.12, 21.38.

**HRMS (ESI)**  $m/z$  Calcd for  $[C_{31}H_{23}BrNaO_3SSe, M + Na]^+$ : 656.9609, Found: 656.9610.

**Physical properties:** white solid; **Yield:** 54%, 68.5 mg; **M. p.** 189–191 °C

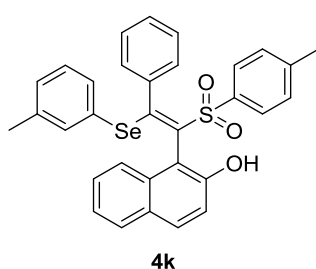

**$^1H$  NMR** (400 MHz,  $CDCl_3$ ):  $\delta$  7.80 (d,  $J$  = 8.9 Hz, 1H), 7.72 (d,  $J$  = 7.8 Hz, 1H), 7.52 (d,  $J$  = 8.1 Hz, 1H), 7.39 (s, 1H), 7.36 – 7.22 (m, 5H), 7.07 (s, 5H), 6.92 – 6.71 (m, 6H), 2.18 (s, 3H), 2.02 (s, 3H).

**$^{13}C$  NMR** (100 MHz,  $CDCl_3$ ):  $\delta$  160.27, 153.20, 143.90, 137.99, 137.73, 135.94, 135.04, 133.87, 132.18, 132.04, 130.25, 129.25, 128.92, 128.84, 128.44, 128.25, 128.05, 127.77, 126.97, 126.94, 126.73, 123.51, 123.00, 119.23, 114.18, 21.36, 20.79.

**HRMS (ESI)**  $m/z$  Calcd for  $[C_{32}H_{26}NaO_3SSe, M + Na]^+$ : 593.0660, Found: 593.0663.

**Physical properties:** white solid; **Yield:** 79%, 90.0 mg; **M. p.** 187–189 °C

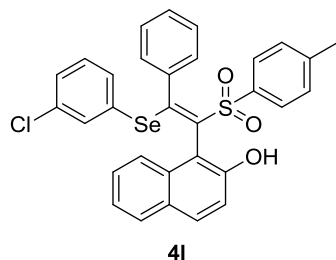

**$^1H$  NMR** (400 MHz,  $CDCl_3$ ):  $\delta$  7.82 (d,  $J$  = 8.9 Hz, 1H), 7.74 (d,  $J$  = 6.8 Hz, 1H), 7.47 (d,  $J$  = 8.0 Hz, 1H), 7.40 (s, 1H), 7.35 – 7.25 (m, 5H), 7.18 – 7.07 (m, 5H), 7.02 (d, 1H), 6.96 (s, 1H), 6.89 (t,  $J$  = 8.4 Hz, 3H), 6.83 (t,  $J$  = 7.8 Hz, 1H), 2.20 (s, 3H).

**$^{13}\text{C}$  NMR** (100 MHz,  $\text{CDCl}_3$ ):  $\delta$  159.03, 153.28, 144.11, 136.68, 135.74, 134.97, 134.72, 133.54, 132.24, 132.08, 131.02, 129.29, 128.93, 128.76, 128.49, 128.37, 128.34, 128.17, 127.26, 127.12, 123.62, 122.82, 119.29, 113.95, 21.40.

**HRMS (ESI)**  $m/z$  Calcd for  $[\text{C}_{31}\text{H}_{23}\text{ClNaO}_3\text{SSe}, \text{M} + \text{Na}]^+$ : 613.0114, Found: 613.0113

**Physical properties:** white solid; **Yield:** 61%, 72.0 mg; **M. p.** 183–185 °C

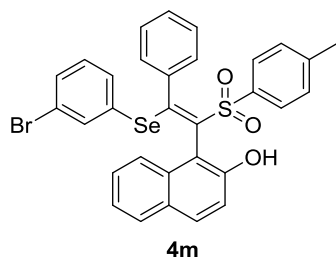

**$^1\text{H}$  NMR** (400 MHz,  $\text{CDCl}_3$ ):  $\delta$  7.82 (d,  $J$  = 8.9 Hz, 1H), 7.74 (d,  $J$  = 6.9 Hz, 1H), 7.45 (d,  $J$  = 7.5 Hz, 1H), 7.38 (s, 1H), 7.34 – 7.25 (m, 5H), 7.24 – 7.05 (m, 7H), 6.96 (d,  $J$  = 7.7 Hz, 1H), 6.89 (d,  $J$  = 8.0 Hz, 2H), 6.78 (t,  $J$  = 7.8 Hz, 1H), 2.20 (s, 3H).

**$^{13}\text{C}$  NMR** (100 MHz,  $\text{CDCl}_3$ ):  $\delta$  159.13, 153.26, 144.15, 139.48, 135.65, 135.36, 134.71, 132.27, 132.06, 131.63, 130.87, 129.60, 128.94, 128.66, 128.52, 128.34, 128.22, 127.28, 127.11, 123.63, 122.80, 121.67, 119.34, 113.97, 21.41.

**HRMS (ESI)**  $m/z$  Calcd for  $[\text{C}_{31}\text{H}_{23}\text{BrNaO}_3\text{SSe}, \text{M} + \text{Na}]^+$ : 656.9609, Found: 656.9610.

**Physical properties:** white solid; **Yield:** 76%, 96.4 mg; **M. p.** 189–191 °C

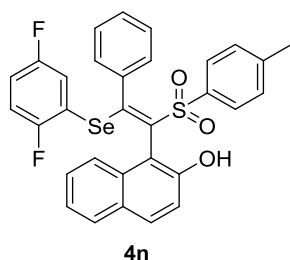

**$^1\text{H}$  NMR** (400 MHz,  $\text{CDCl}_3$ ):  $\delta$  7.81 (d,  $J$  = 8.9 Hz, 1H), 7.73 (d,  $J$  = 7.8 Hz, 1H), 7.51 (d,  $J$  = 8.1 Hz, 1H), 7.42 – 7.24 (m, 6H), 7.24 – 7.07 (m, 5H), 6.89 (d,  $J$  = 7.9 Hz, 2H), 6.82 – 6.69 (m, 2H), 6.69 – 6.60 (m, 1H), 2.20 (s, 3H).

**$^{13}\text{C}$  NMR** (100 MHz,  $\text{CDCl}_3$ ):  $\delta$  158.58 (d,  $J$  = 241.0 Hz), 158.30, 157.28 (d,  $J$  = 244.0 Hz), 153.34, 144.21, 135.52, 134.77, 132.37, 132.01, 131.55, 128.94, 128.54, 128.39, 128.30, 124.98, 124.74, 123.70, 122.83, 119.31, 118.31 (d,  $J$  = 8.0 Hz), 118.08 (d,  $J$  = 7.0 Hz), 115.97 (d,  $J$  = 8.0 Hz), 115.70 (d,  $J$  = 8.0 Hz), 113.86, 21.41.

**HRMS (ESI)**  $m/z$  Calcd for  $[\text{C}_{31}\text{H}_{22}\text{F}_2\text{NaO}_3\text{SSe}, \text{M} + \text{Na}]^+$ : 615.0315, Found: 615.0313.

**Physical properties:** white solid; **Yield:** 64%, 75.7 mg; **M. p.** 203–204 °C

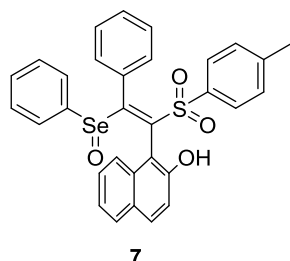

**$^1\text{H}$  NMR** (400 MHz,  $\text{CDCl}_3$ ):  $\delta$  8.01 (d,  $J$  = 8.3 Hz, 1H), 7.80 (d,  $J$  = 8.1 Hz, 1H), 7.74 (d,  $J$  = 8.8 Hz, 1H), 7.63 (t,  $J$  = 7.6 Hz, 1H), 7.48 – 7.30 (m, 7H), 7.30 – 7.20 (m, 5H), 6.94 (d,  $J$  = 8.0 Hz, 3H), 6.80 (d,  $J$  = 7.7 Hz, 2H), 2.25 (s, 3H).

**$^{13}\text{C}$  NMR** (100 MHz,  $\text{CDCl}_3$ ):  $\delta$  155.60, 154.16, 146.43, 143.96, 137.63, 136.64, 134.25, 132.34, 131.66, 130.73, 129.34, 129.13, 128.68, 128.47, 128.32, 127.88, 127.66, 127.14, 126.78, 126.05, 124.35, 123.55, 118.61, 111.07, 21.52.

**HRMS (ESI)**  $m/z$  Calcd for  $[\text{C}_{31}\text{H}_{24}\text{NaO}_4\text{SSe}, \text{M} + \text{Na}]^+$ : 595.0453, Found: 595.0458.

**Physical properties:** white solid; **Yield:** 89%, 254.0 mg; **M. p.** 123–126 °C

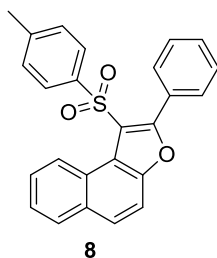

**$^1\text{H}$  NMR** (400 MHz,  $\text{CDCl}_3$ ):  $\delta$  9.15 (d,  $J$  = 8.5 Hz, 1H), 7.92 (d,  $J$  = 8.1 Hz, 1H), 7.83 (d,  $J$  = 8.9 Hz, 1H), 7.80 – 7.68 (m, 4H), 7.66 (d,  $J$  = 8.9 Hz, 1H), 7.60 (t,  $J$  = 7.7 Hz, 1H), 7.55 – 7.44 (m, 4H), 7.14 (d,  $J$  = 8.0 Hz, 2H), 2.29 (s, 3H).

**$^{13}\text{C}$  NMR** (100 MHz,  $\text{CDCl}_3$ ):  $\delta$  160.35, 151.91, 143.89, 139.45, 131.43, 130.82, 130.41, 129.55, 129.15, 129.01, 128.41, 127.74, 127.07, 126.99, 126.61, 126.11, 125.25, 119.95, 118.93, 111.82, 21.47.

**HRMS (ESI)**  $m/z$  Calcd for  $[\text{C}_{25}\text{H}_{18}\text{NaO}_3\text{S}, \text{M} + \text{Na}]^+$ : 421.0869, Found: 421.0862.

**Physical properties:** white solid; **Yield:** 95%, 76.0 mg; **M. p.** 167–168  $^\circ\text{C}$

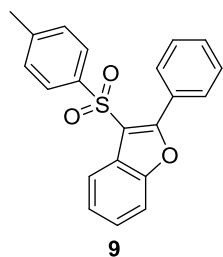

**$^1\text{H}$  NMR** (600 MHz,  $\text{CDCl}_3$ ):  $\delta$  8.09 – 8.03 (m, 1H), 7.82 (d,  $J$  = 7.1 Hz, 2H), 7.58 (d,  $J$  = 8.1 Hz, 2H), 7.43 – 7.37 (m, 4H), 7.29 – 7.25 (m, 2H), 7.05 (d,  $J$  = 8.1 Hz, 2H), 2.21 (s, 3H).

**$^{13}\text{C}$  NMR** (150 MHz,  $\text{CDCl}_3$ ):  $\delta$  158.70, 153.16, 144.08, 139.43, 130.78, 130.05, 129.51, 128.14, 128.10, 126.66, 125.87, 125.47, 124.51, 121.62, 118.72, 111.36, 21.44.

**HRMS (ESI)**  $m/z$  Calcd for  $[\text{C}_{21}\text{H}_{16}\text{NaO}_3\text{S}, \text{M} + \text{Na}]^+$ : 371.0712, Found: 371.0717.

**Physical properties:** white solid; **Yield:** 76%, 132.0 mg; **M. p.** 112–114  $^\circ\text{C}$

## XI. HPLC traces of compound 3a'

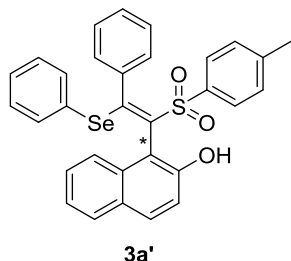

**(3a') HPLC analysis:** Chiralcel AD-H (Hexane/*i*-PrOH = 80:20), flow rate = 1.0 mL/min, wave length = 254 nm,  $t_R$  = 13.251 min (minor),  $t_R$  = 19.035 min (major).

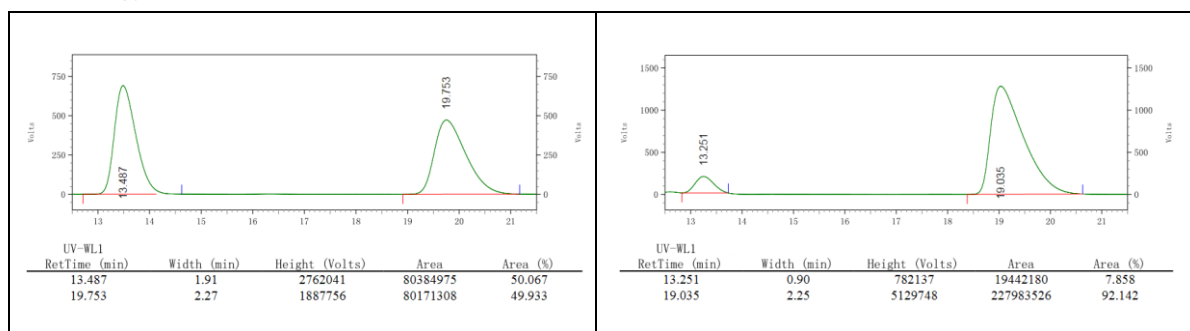

## XII. $^1\text{H}$ and $^{13}\text{C}$ NMR spectra of compounds (1t, 1u, 3a-3u, 4a-4n, 7, 8, 9)

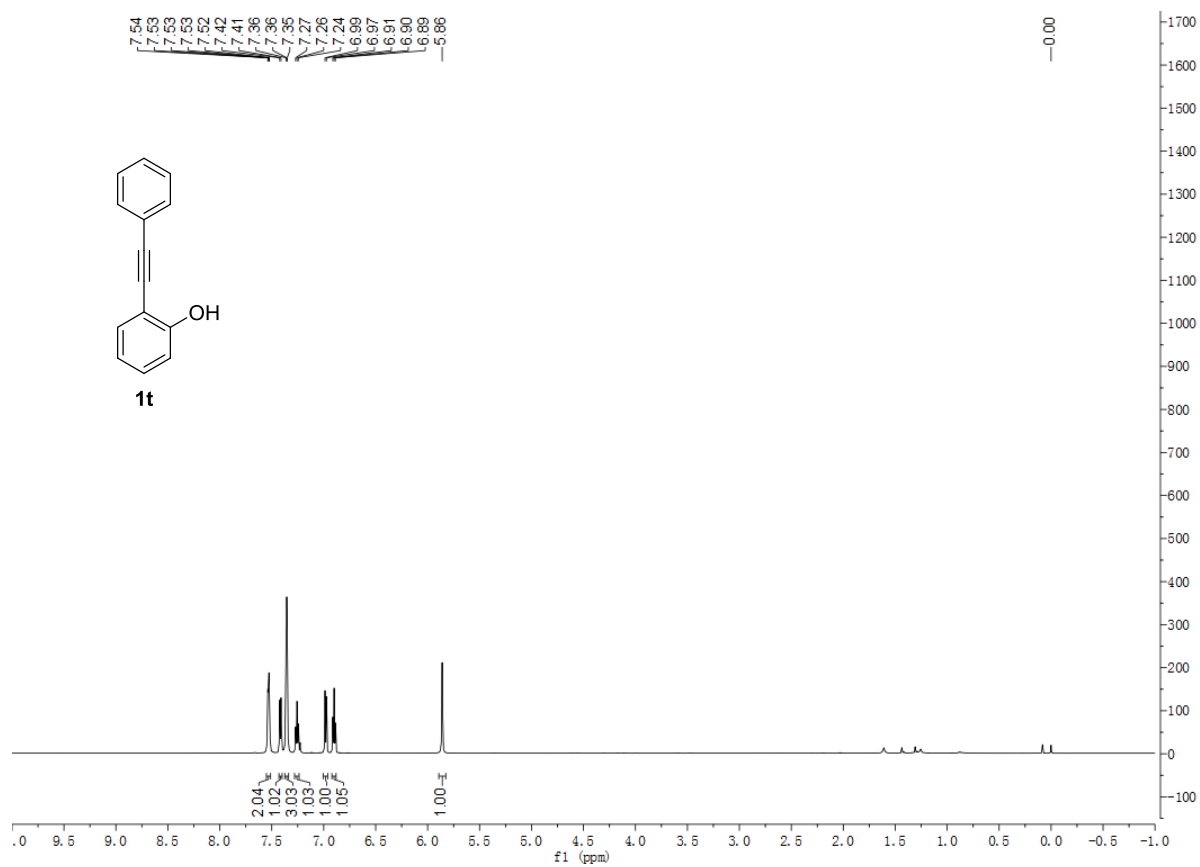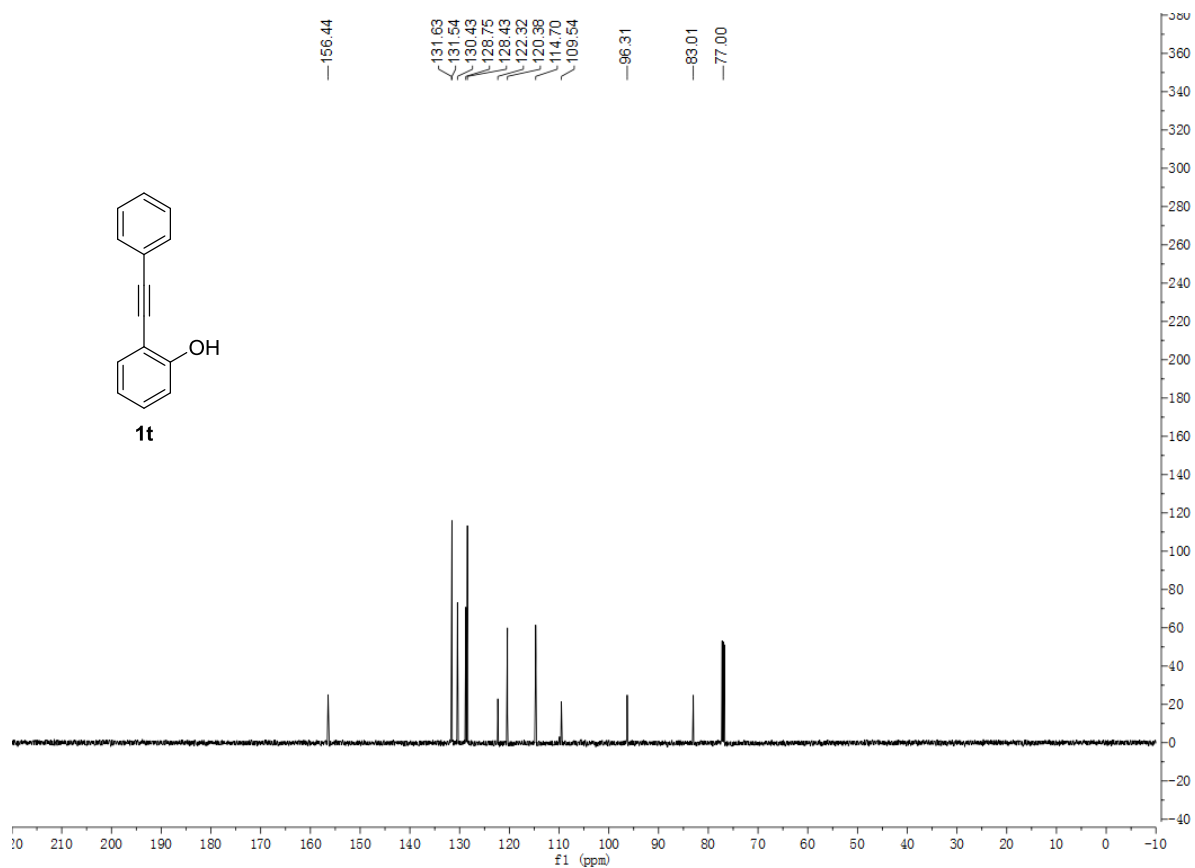

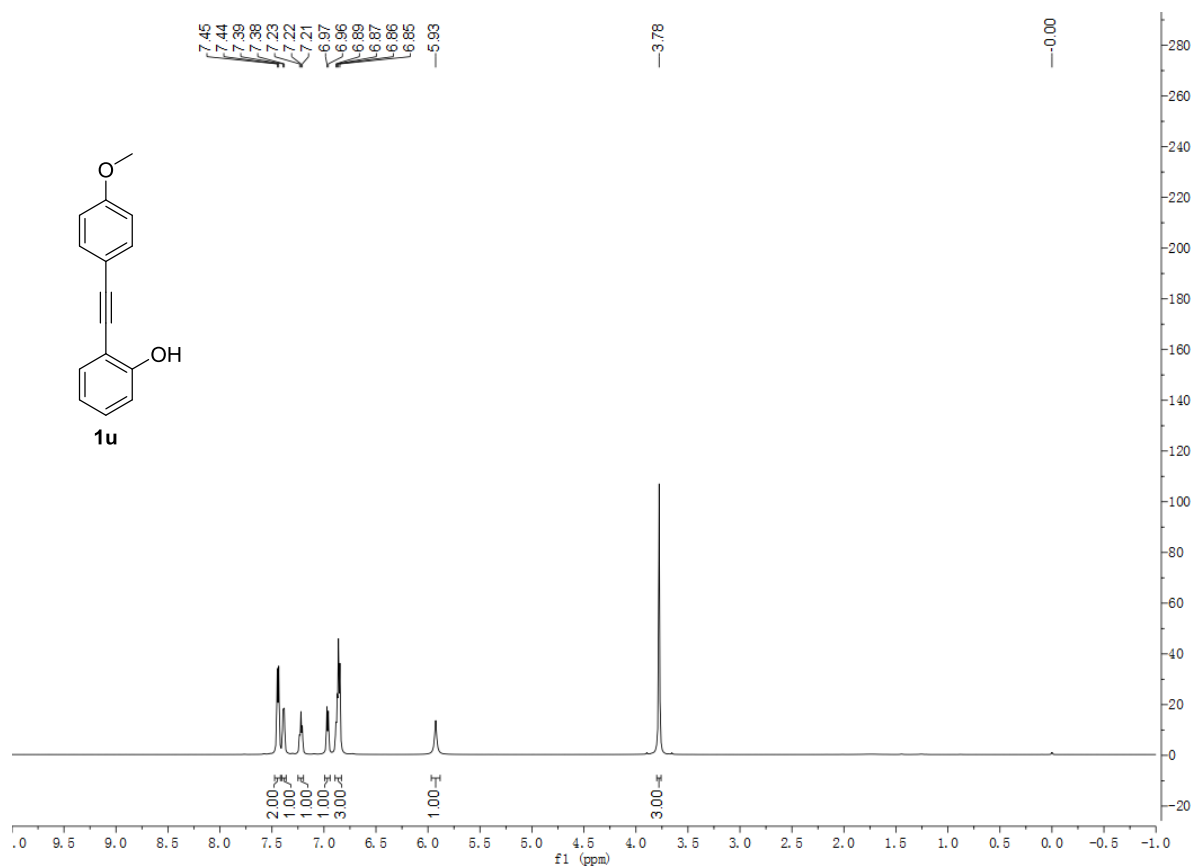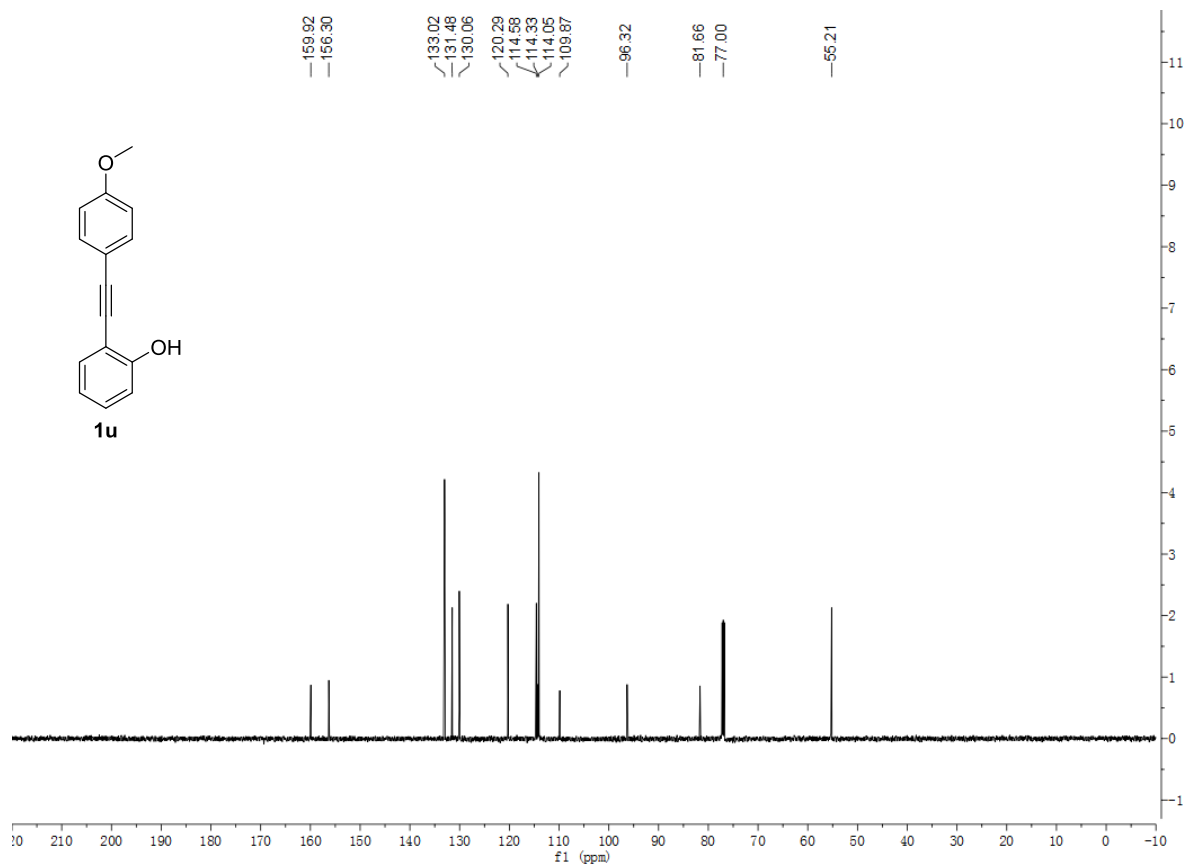

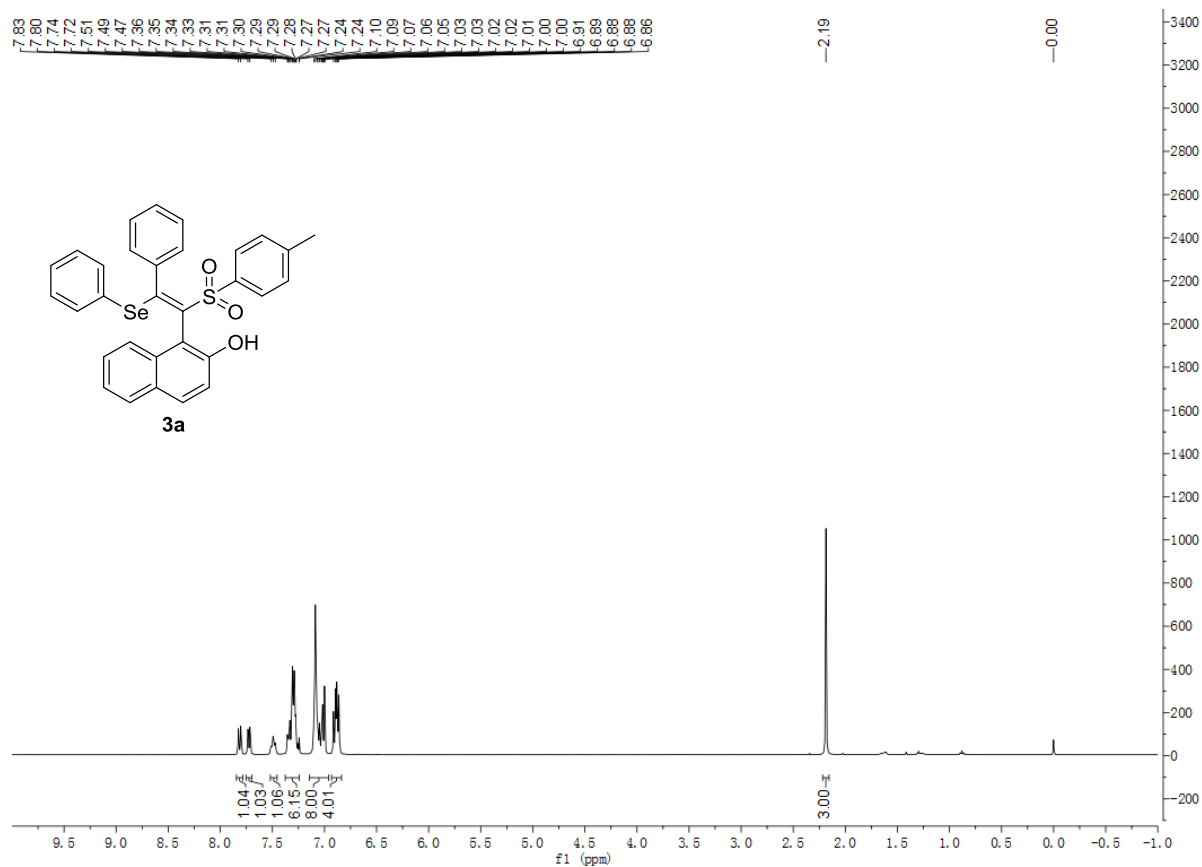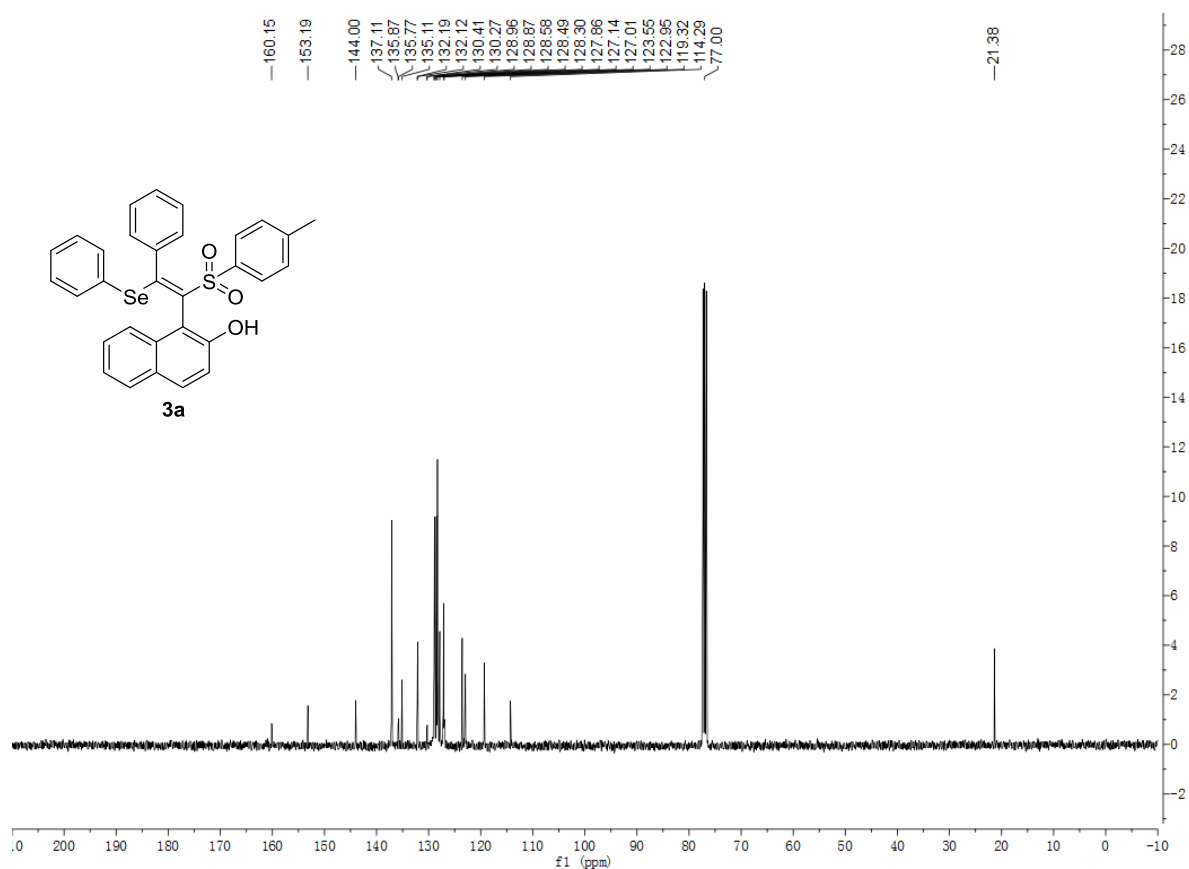

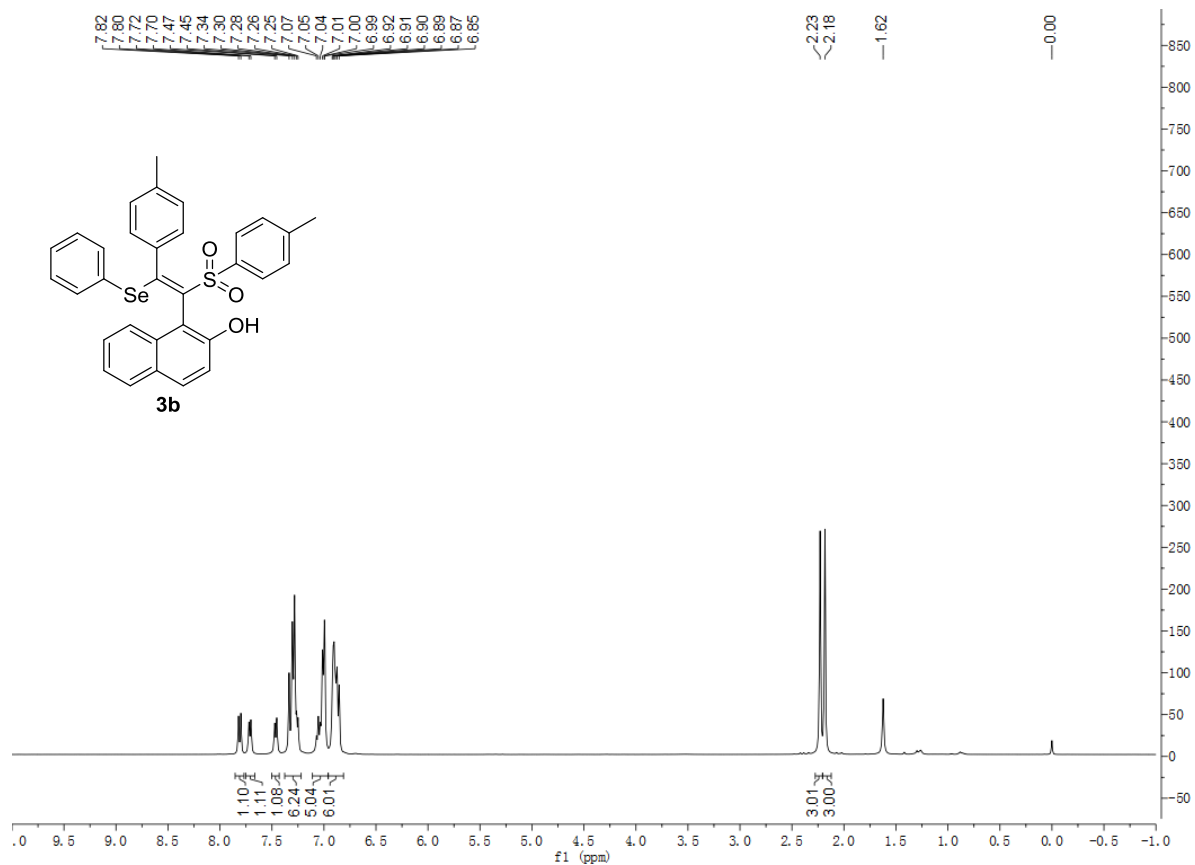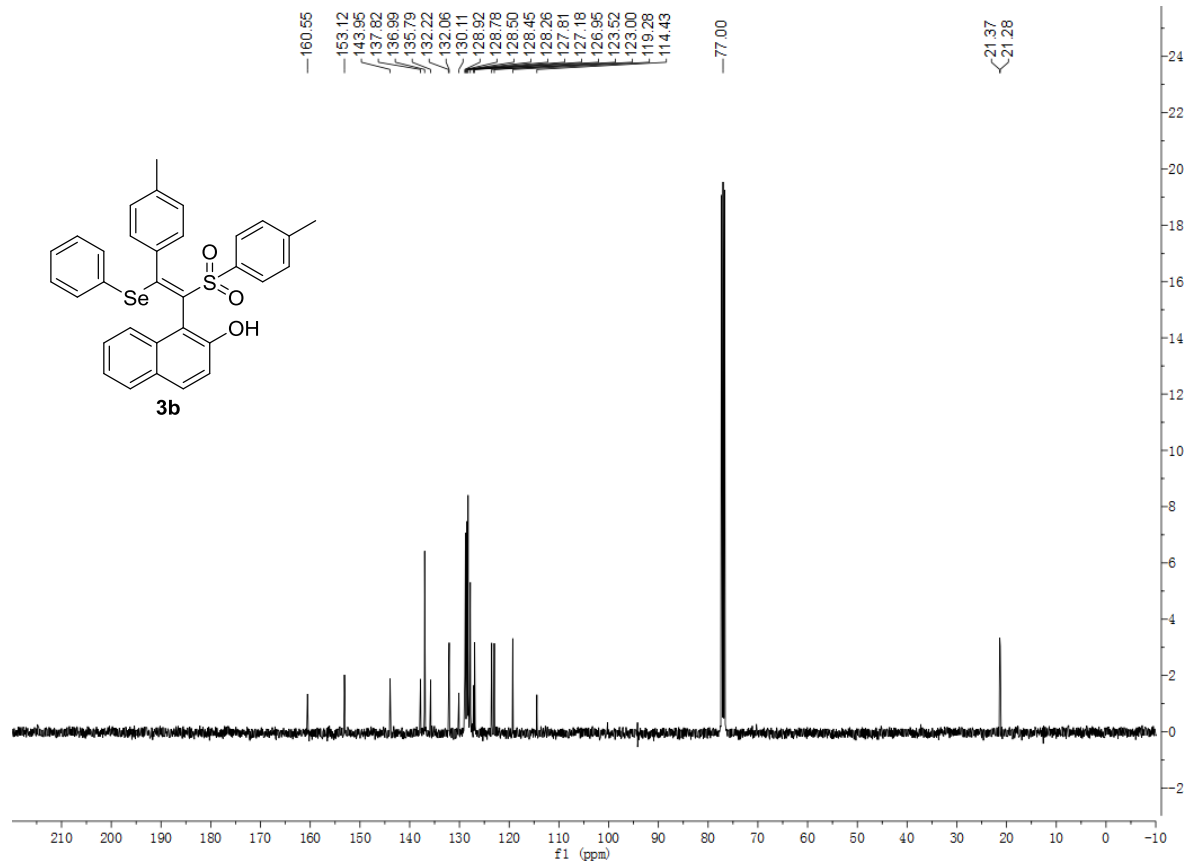

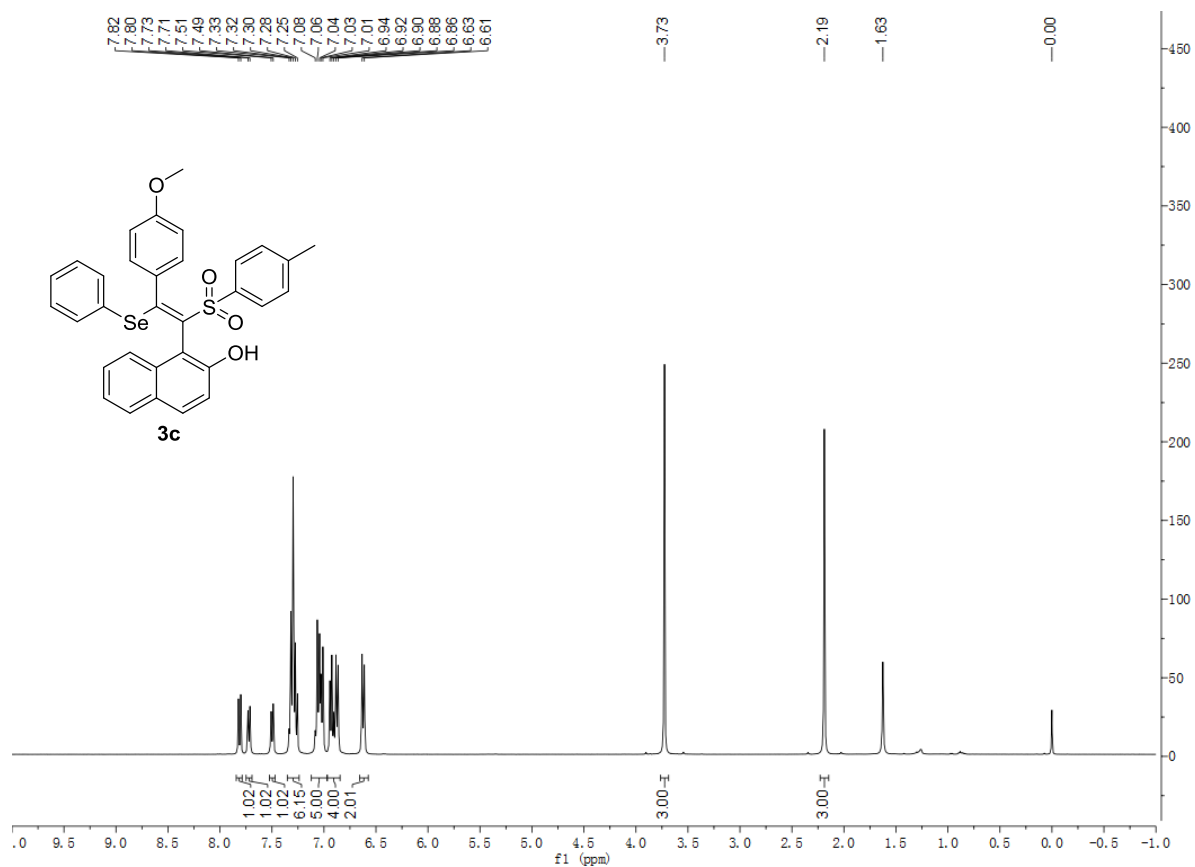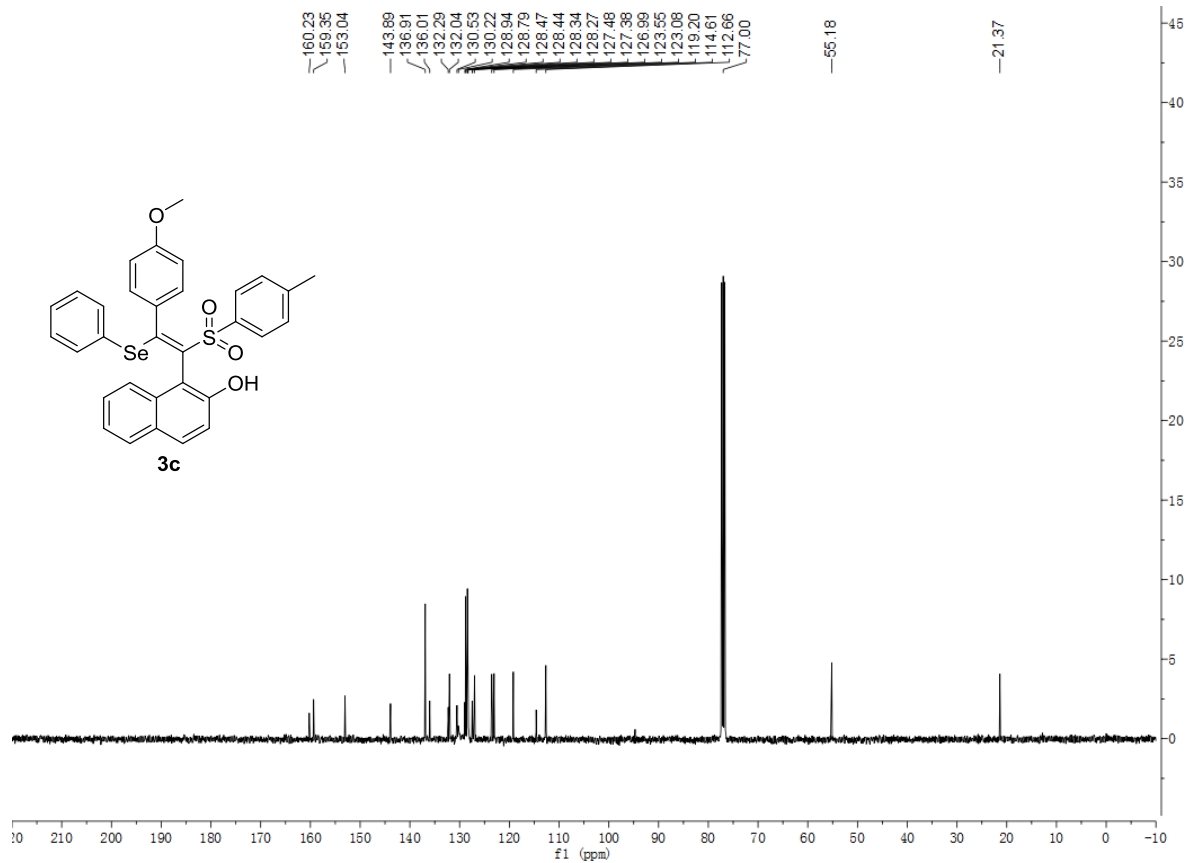

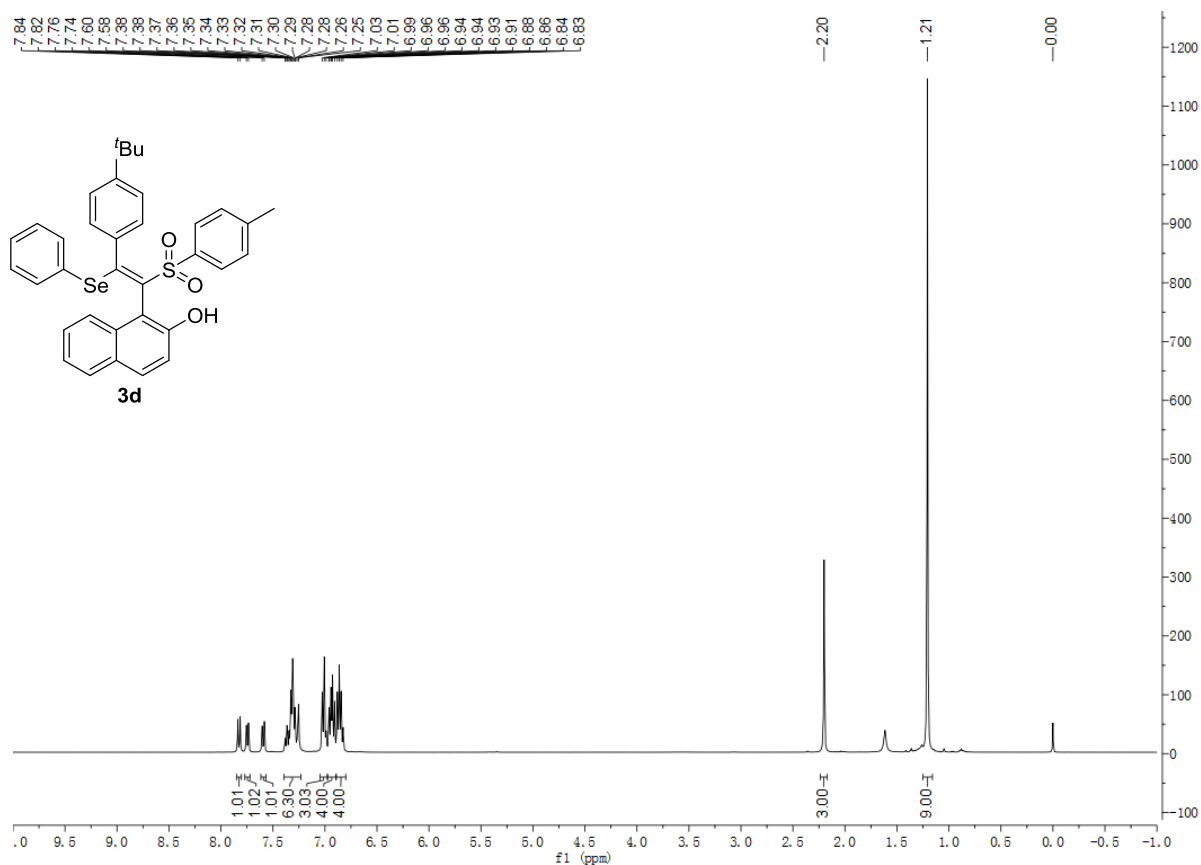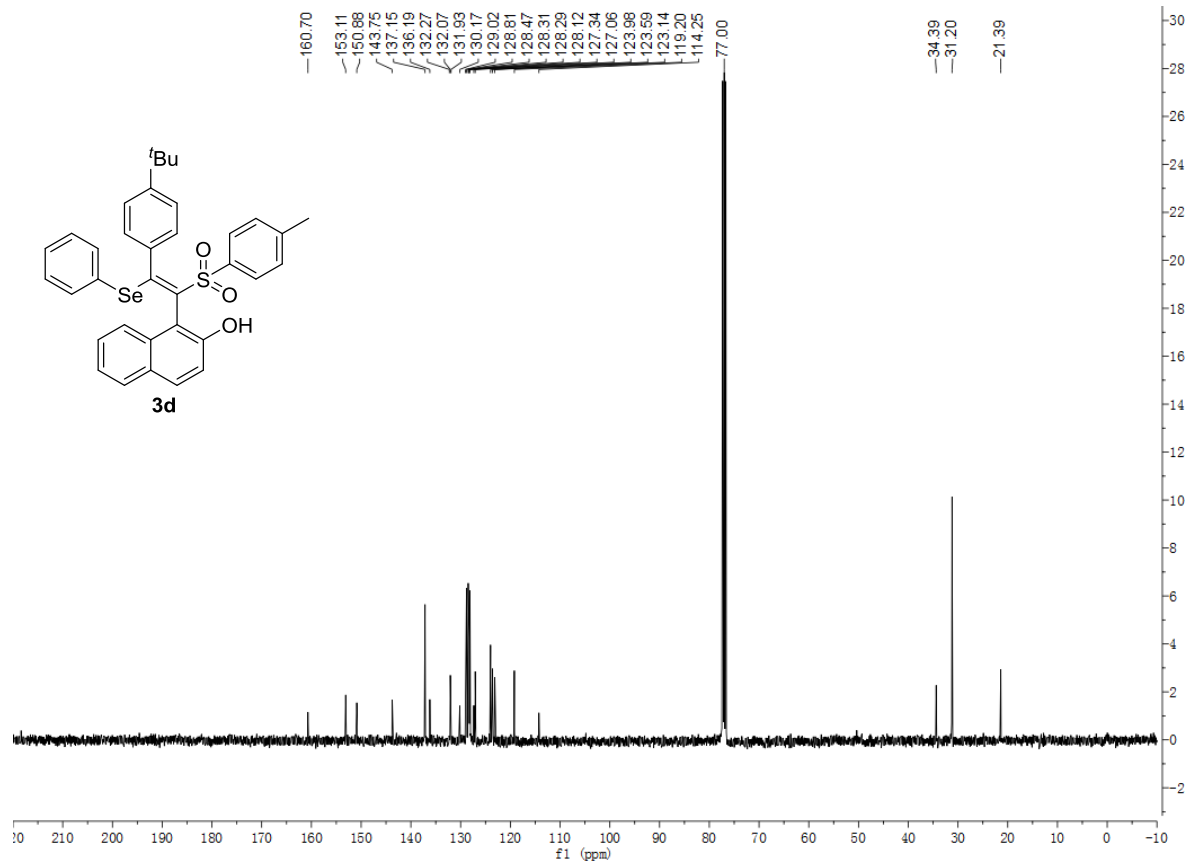

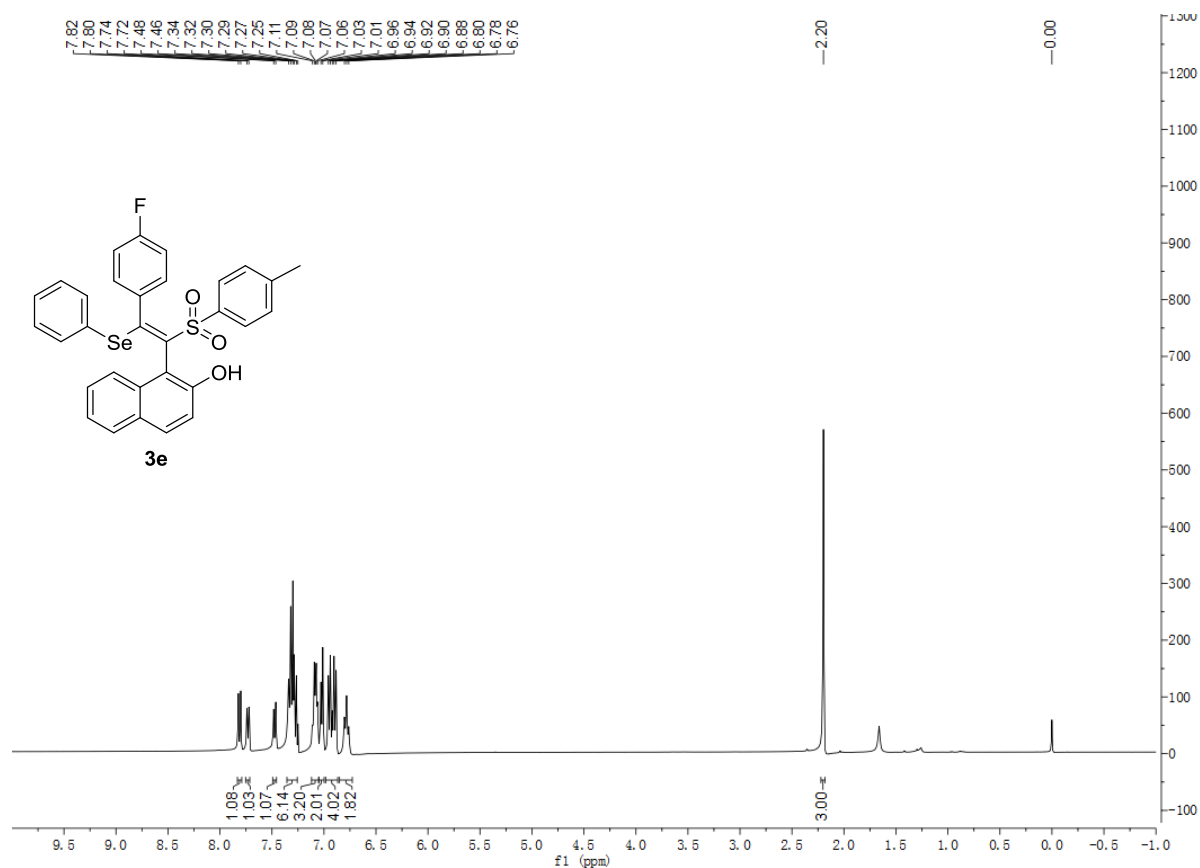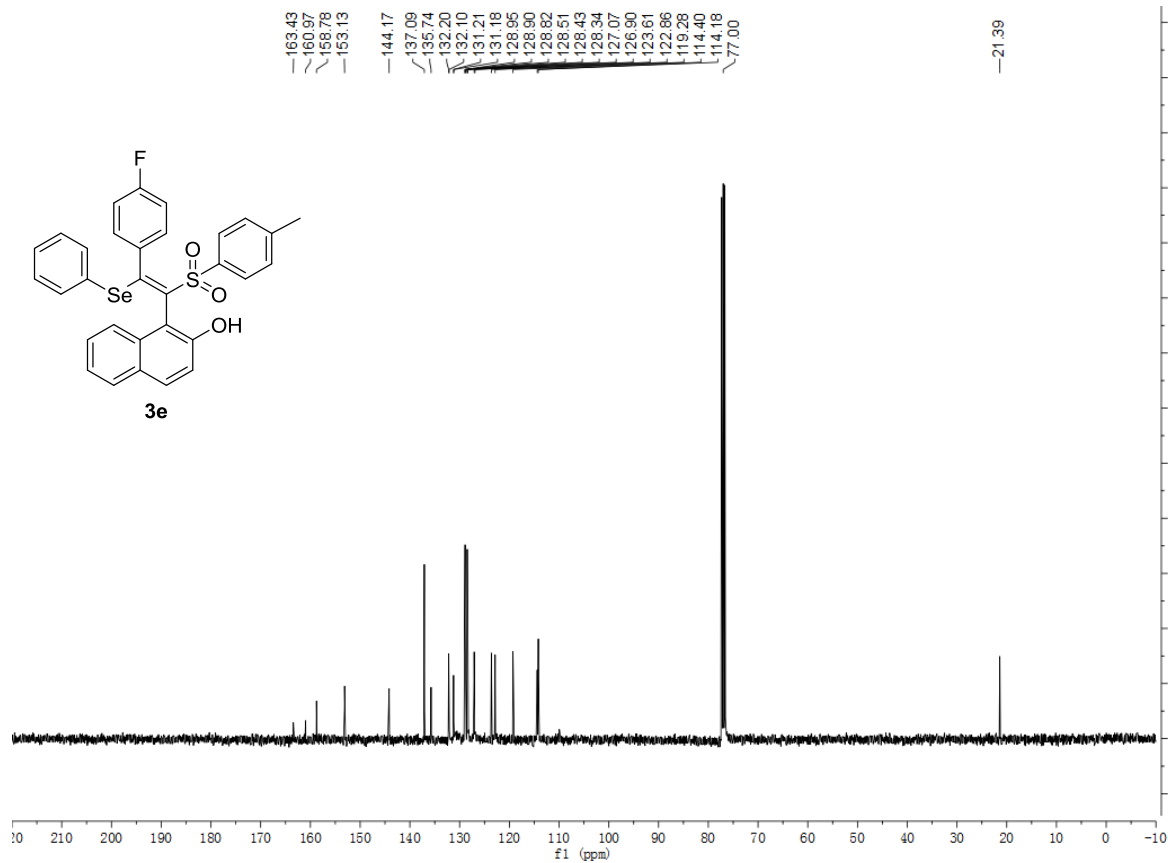

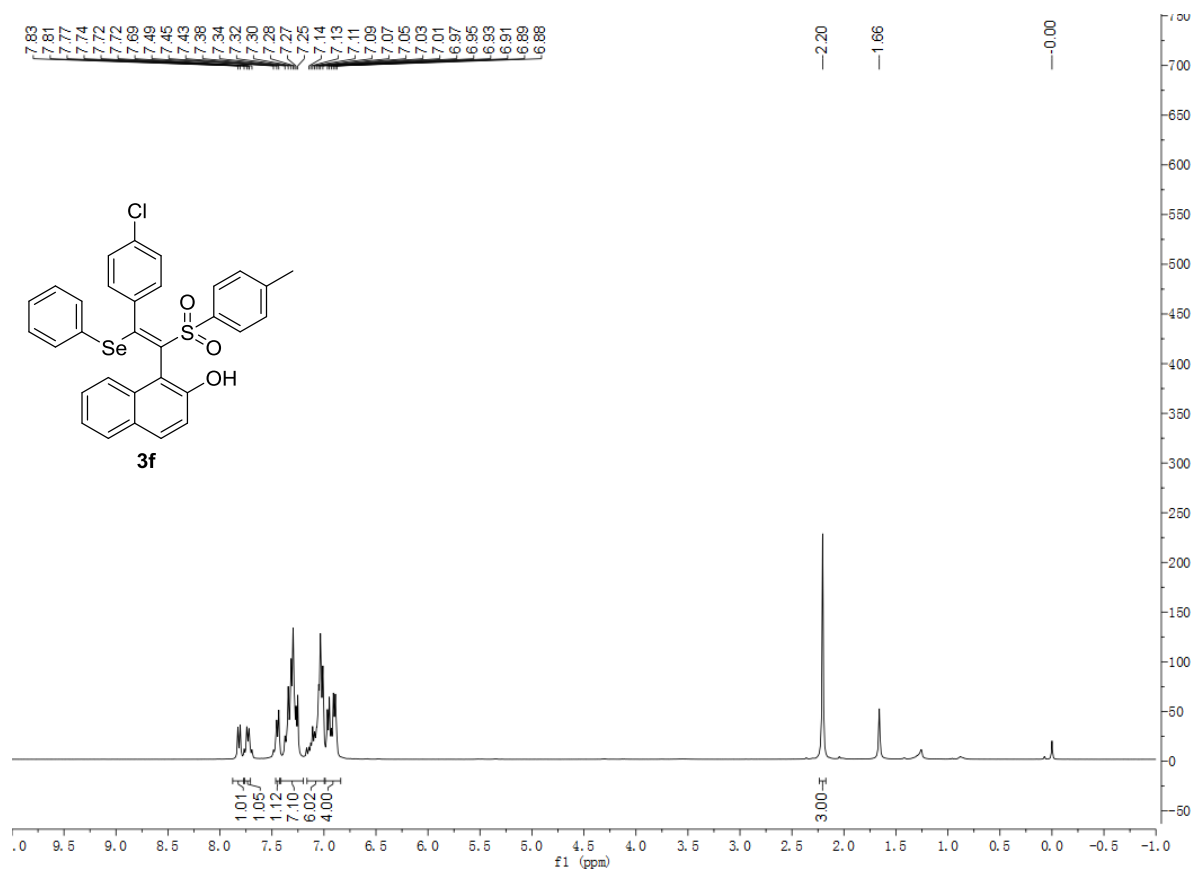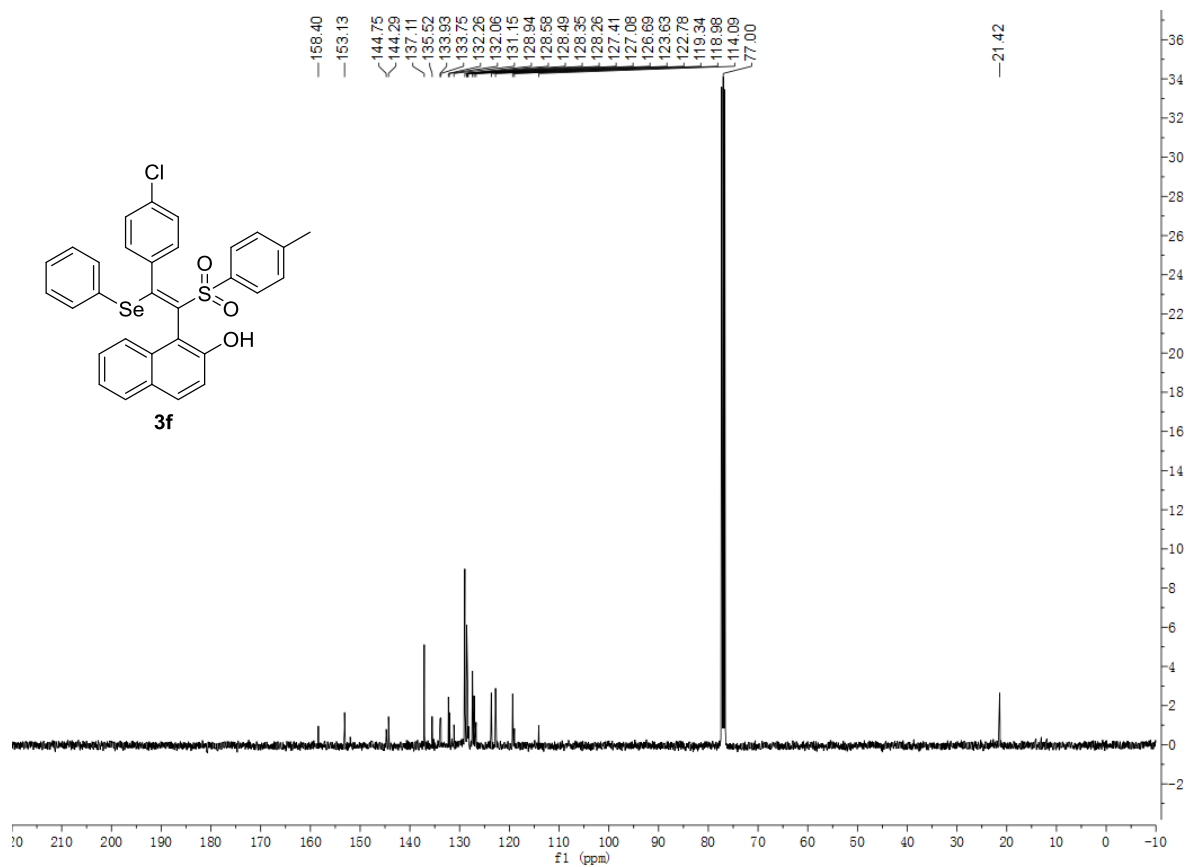

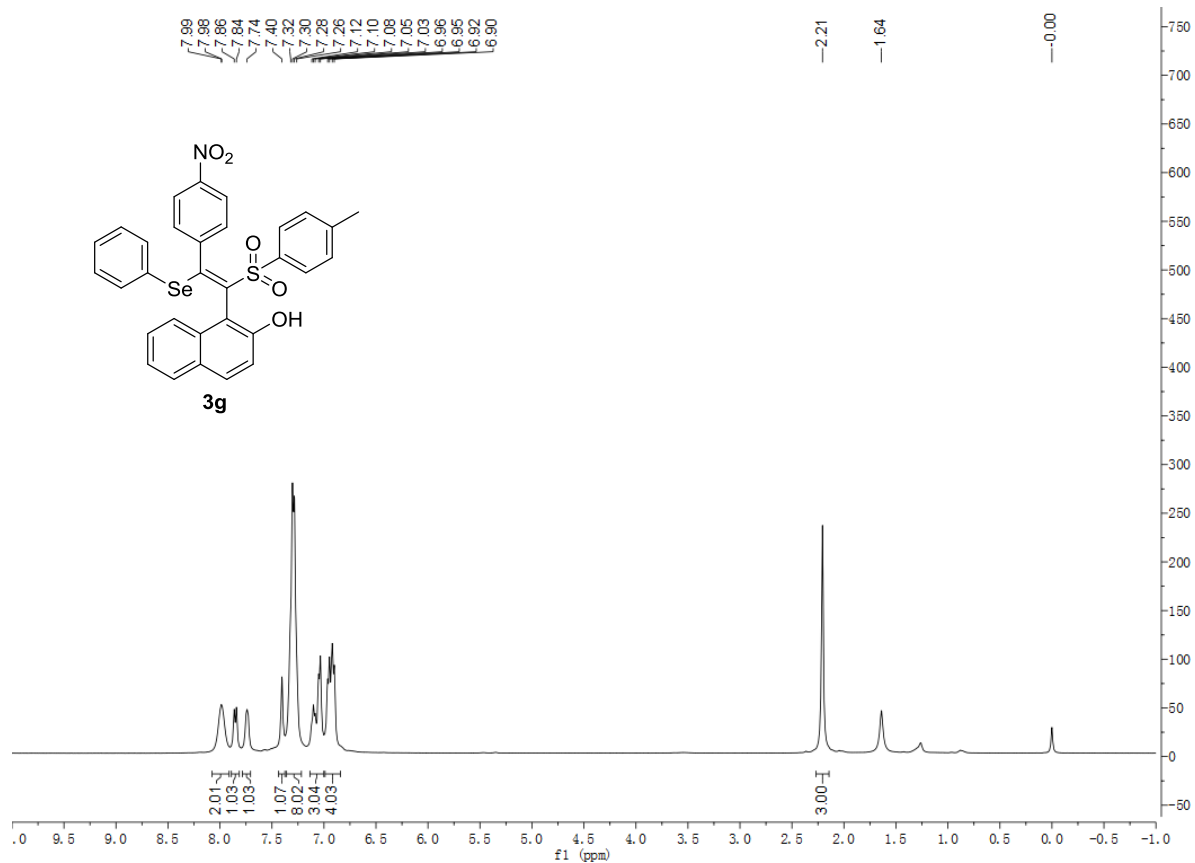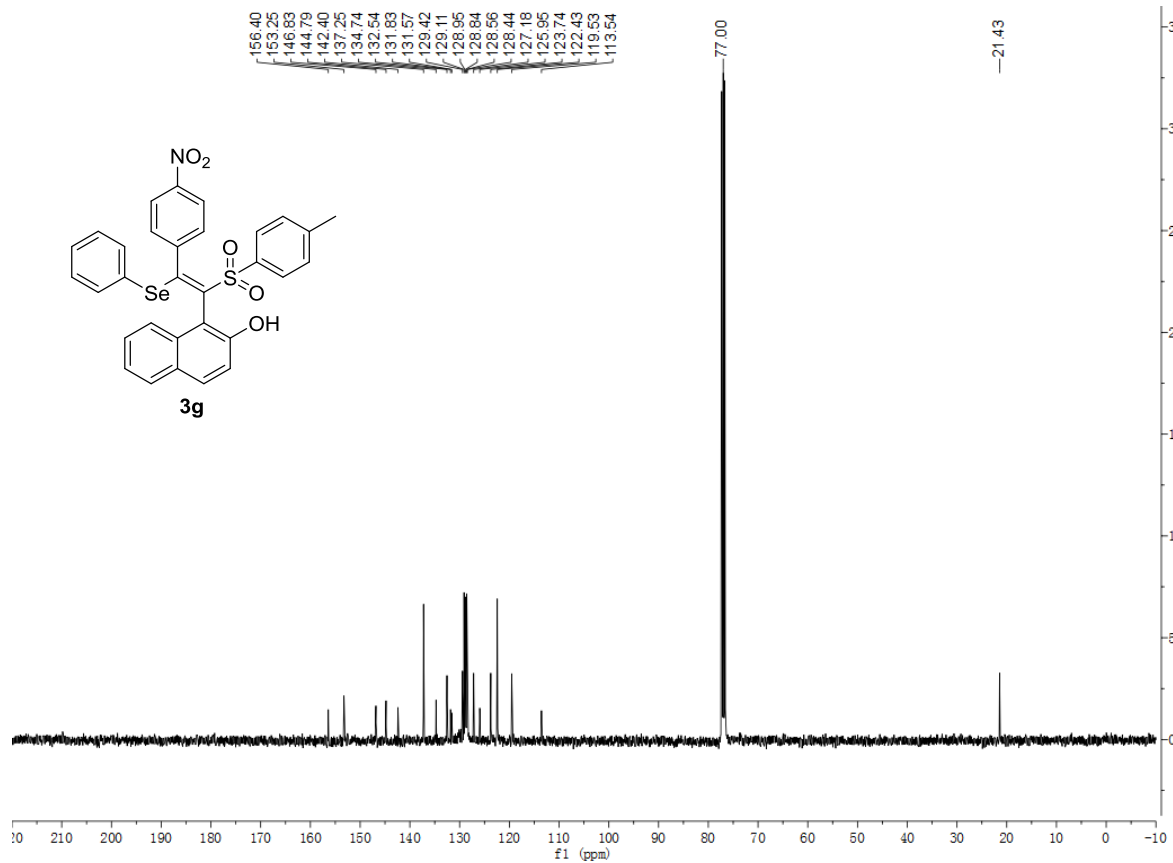

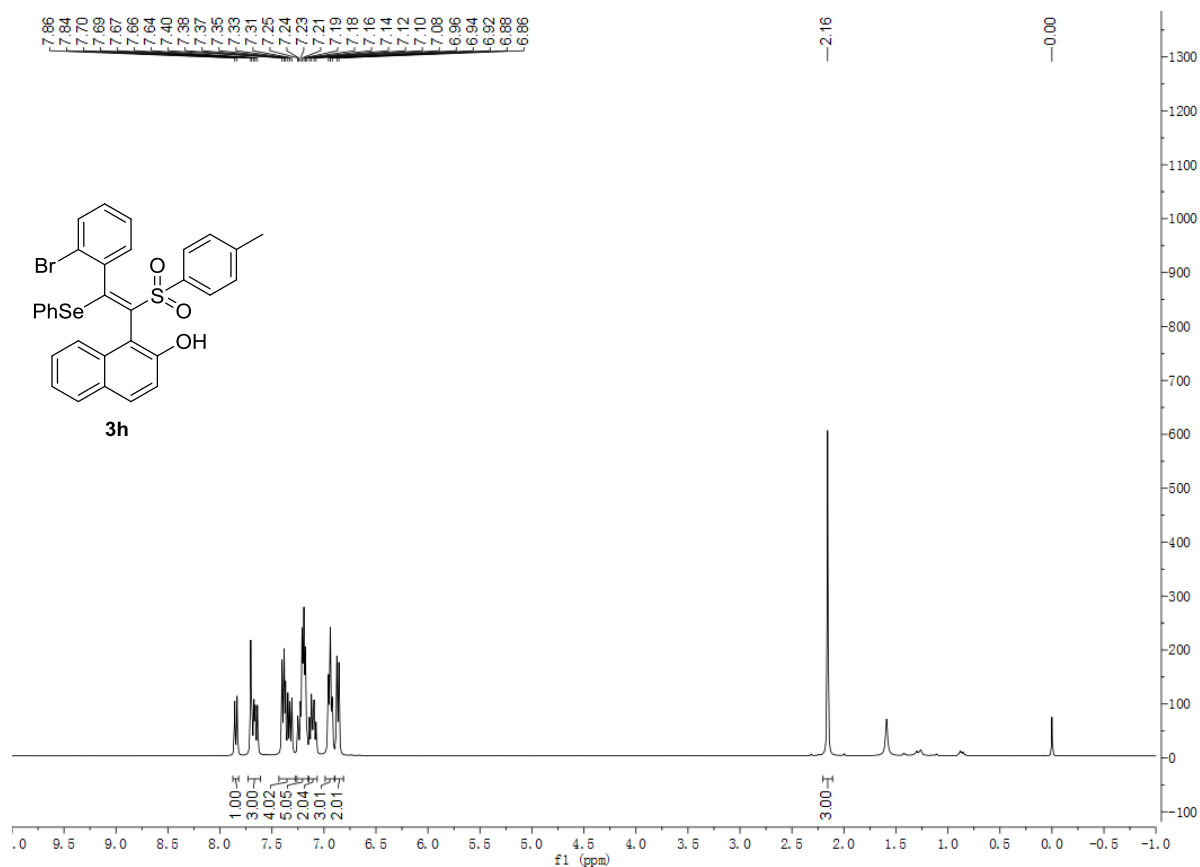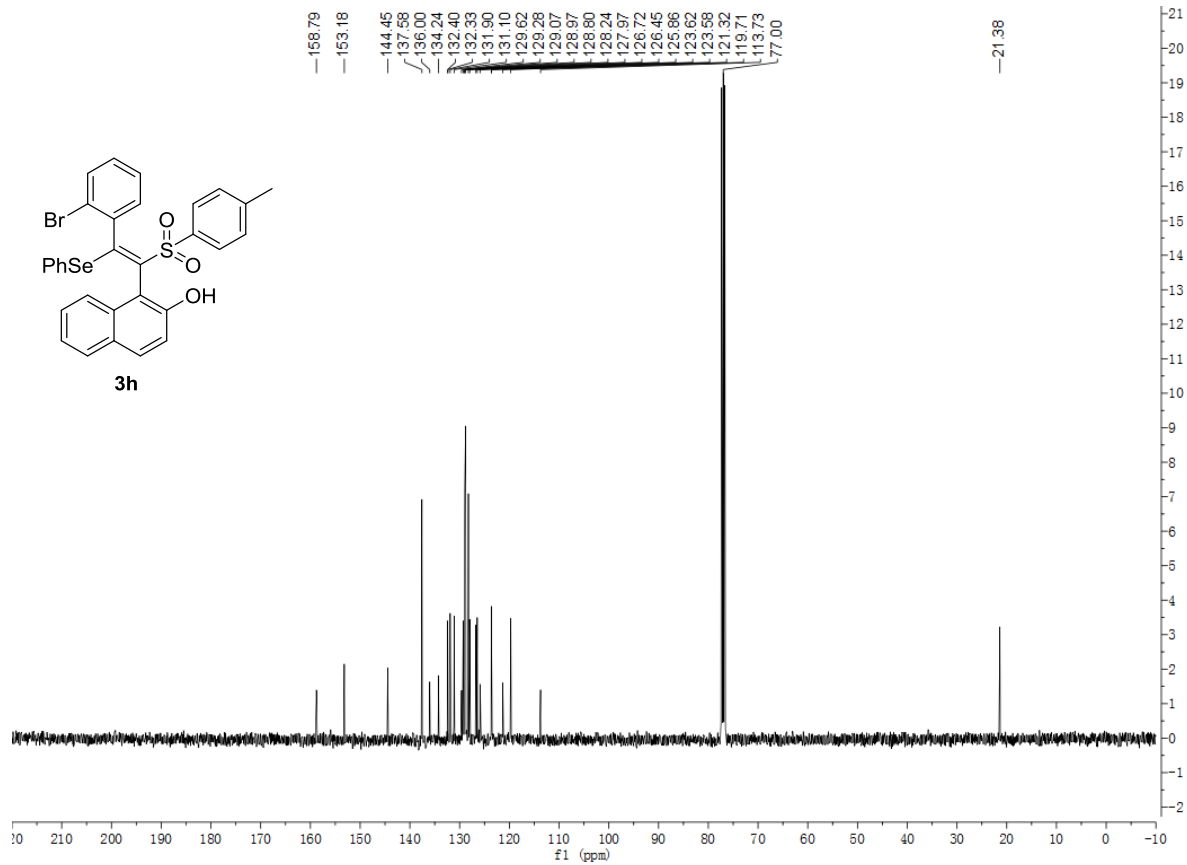

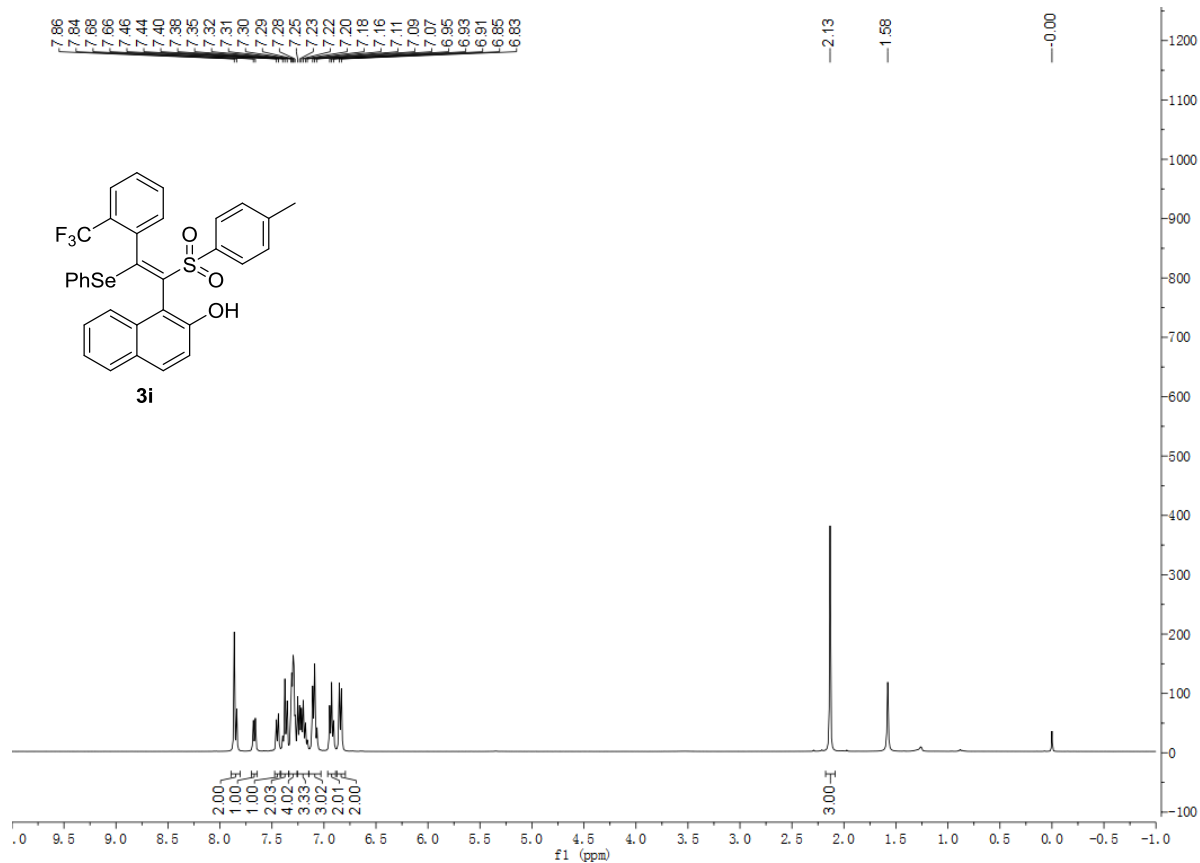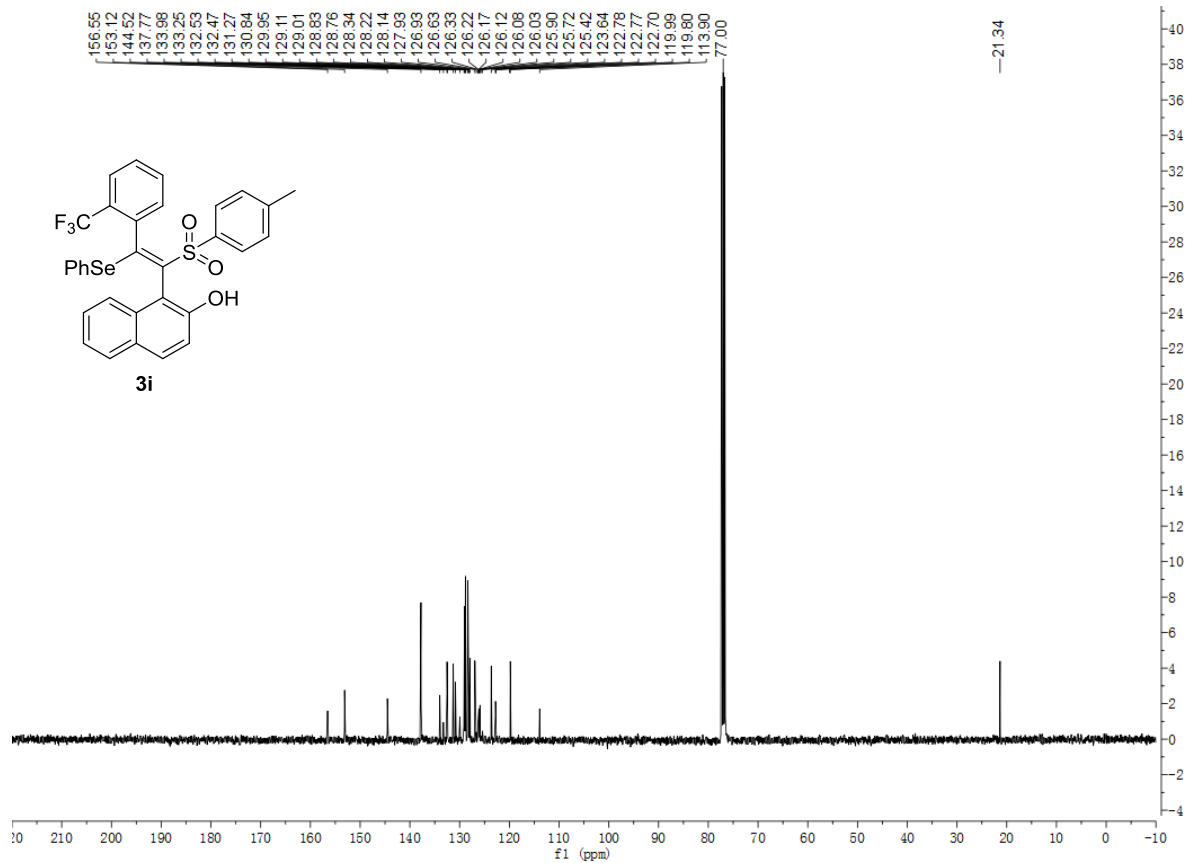

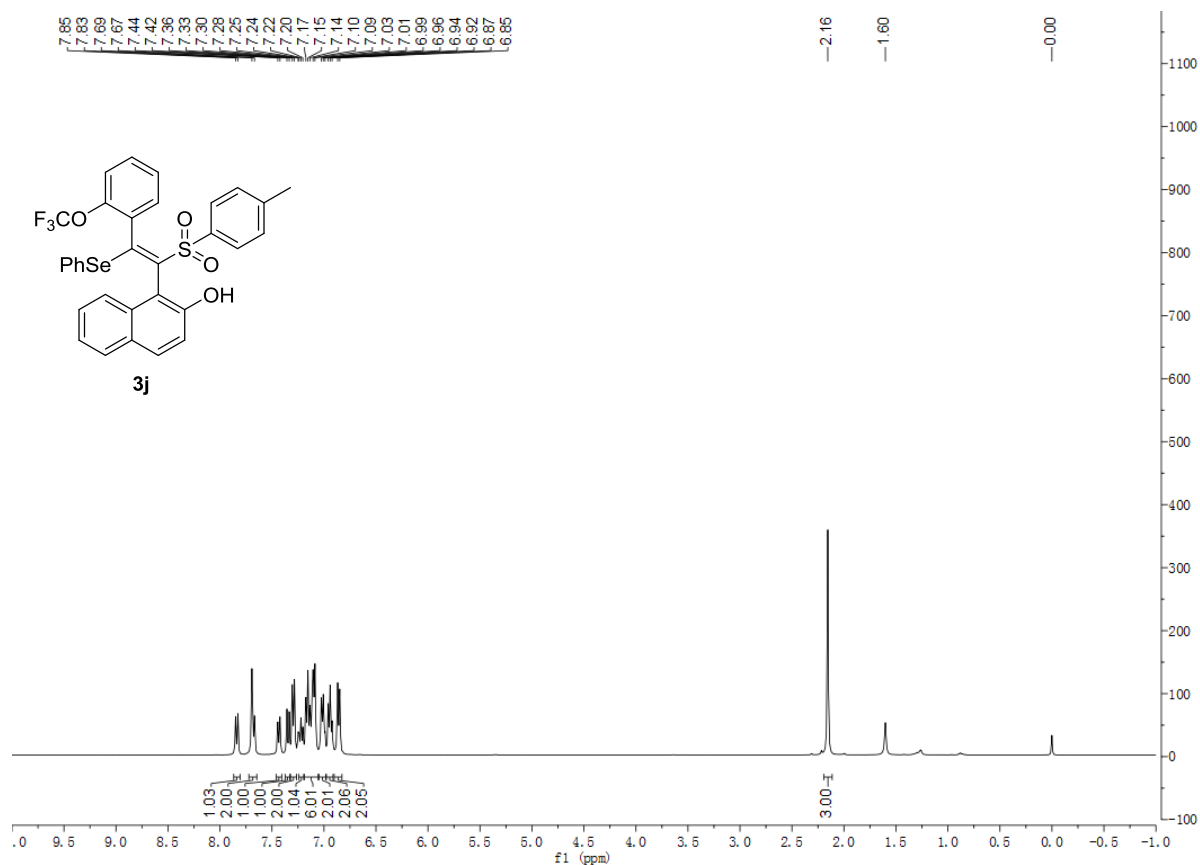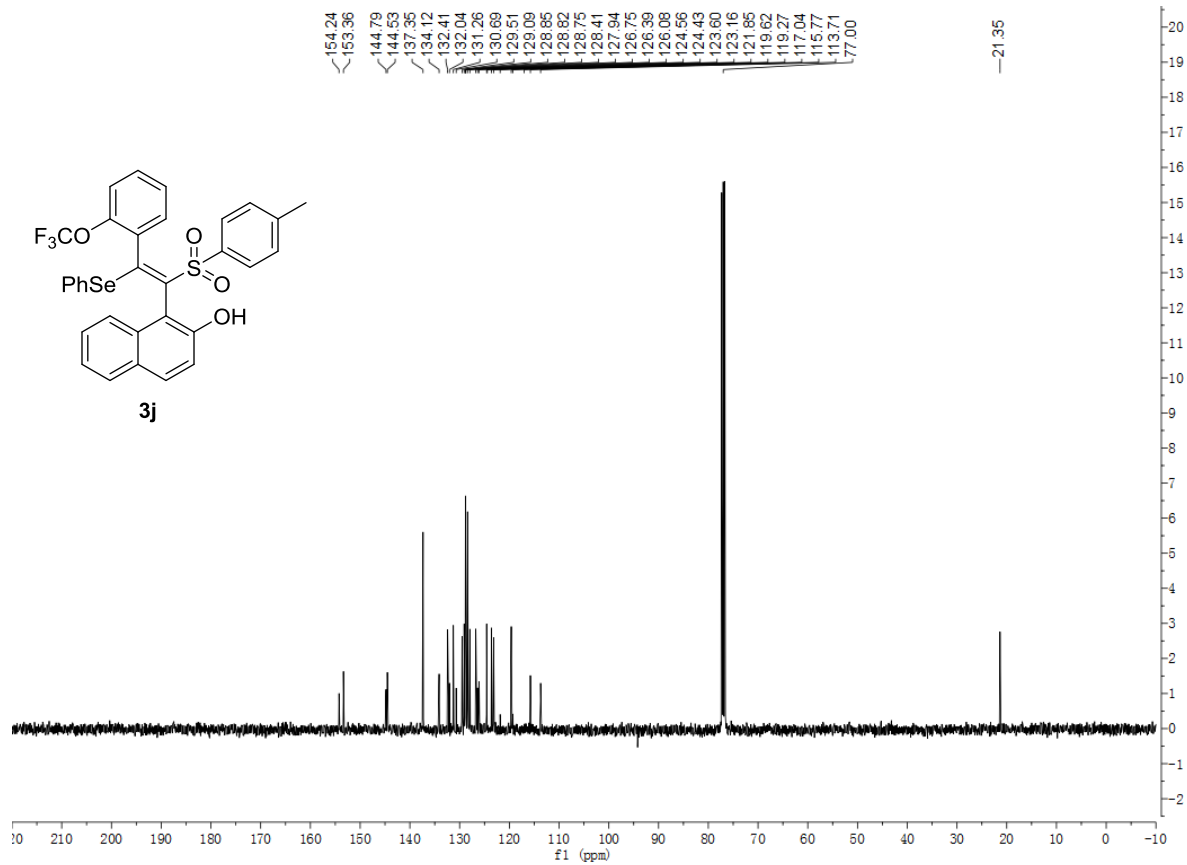

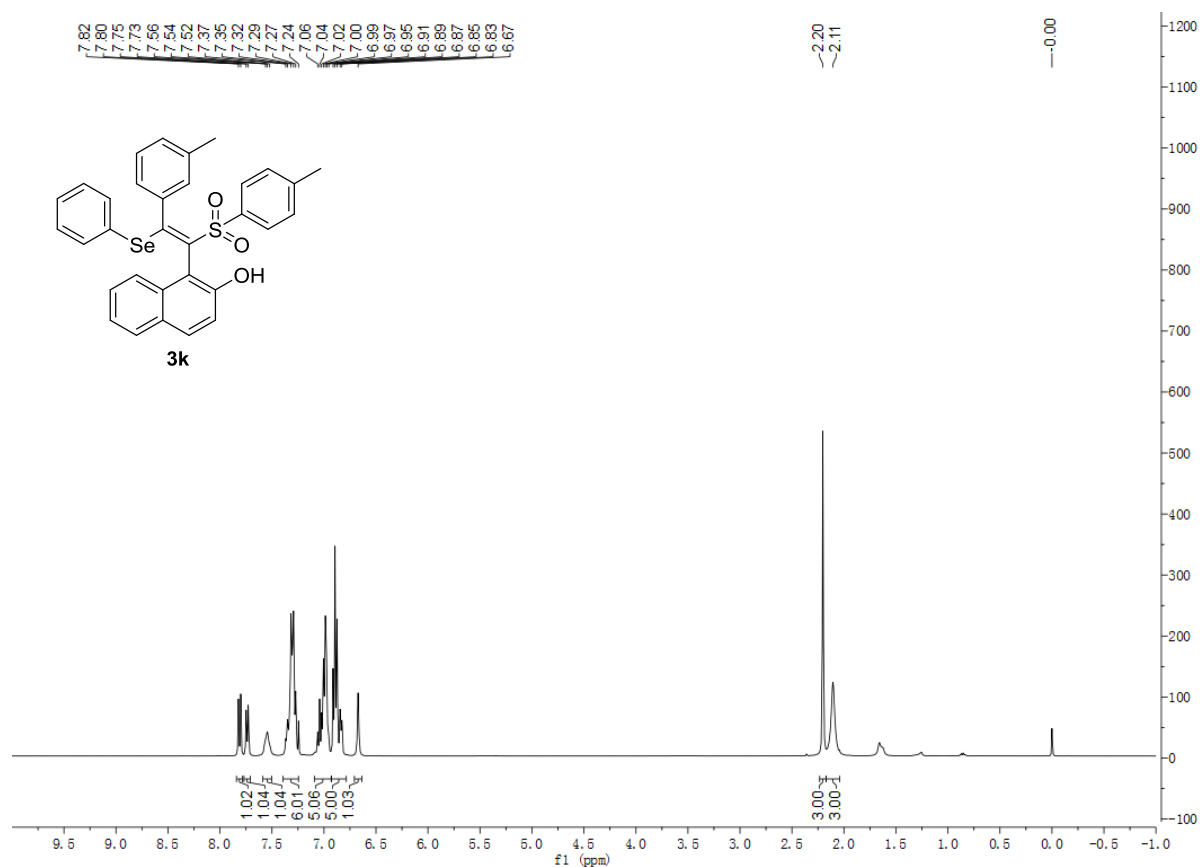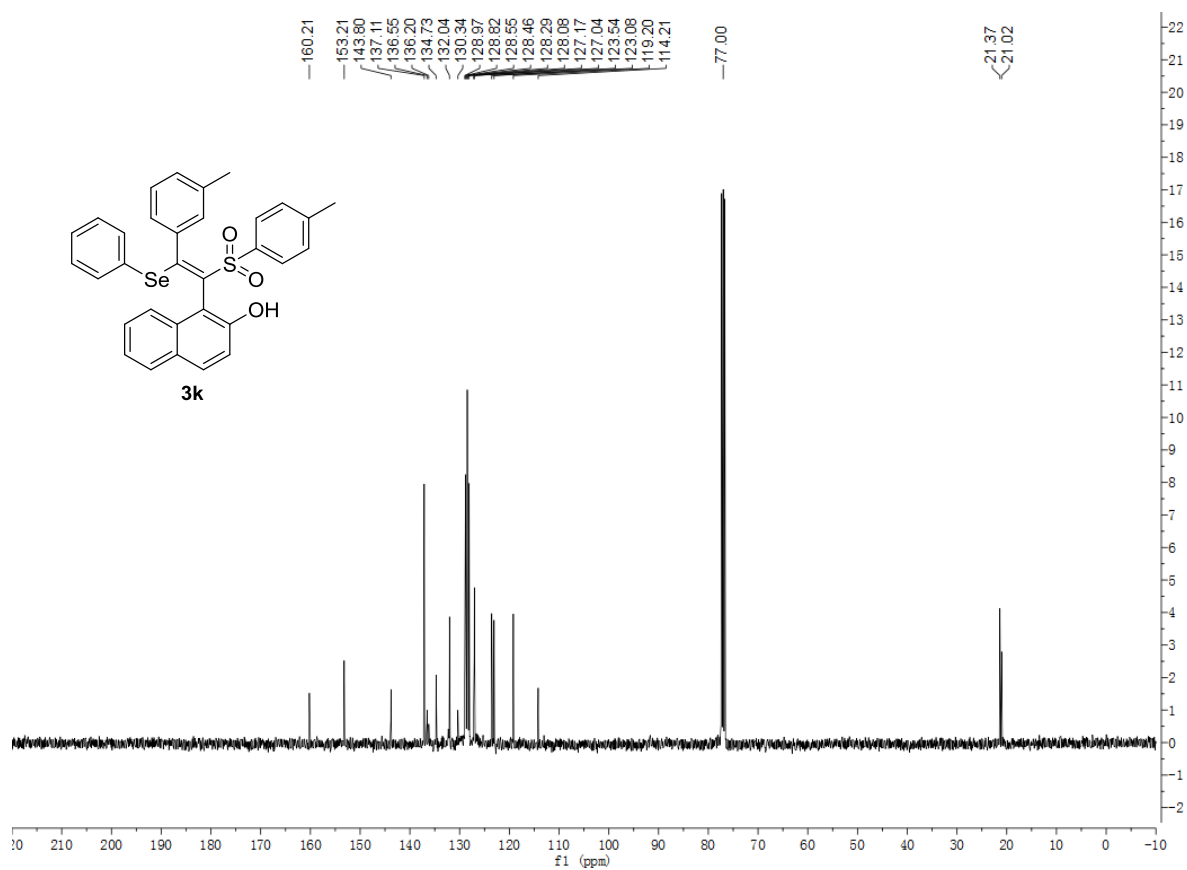

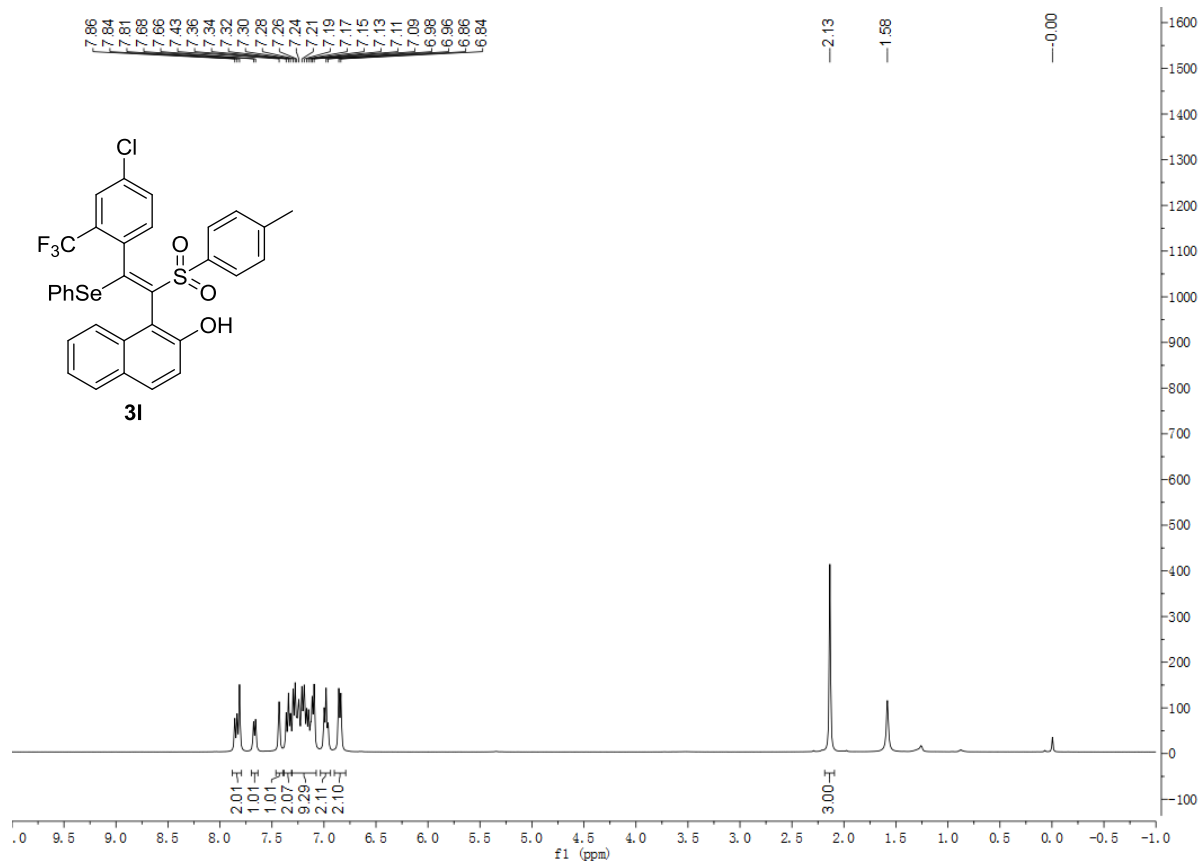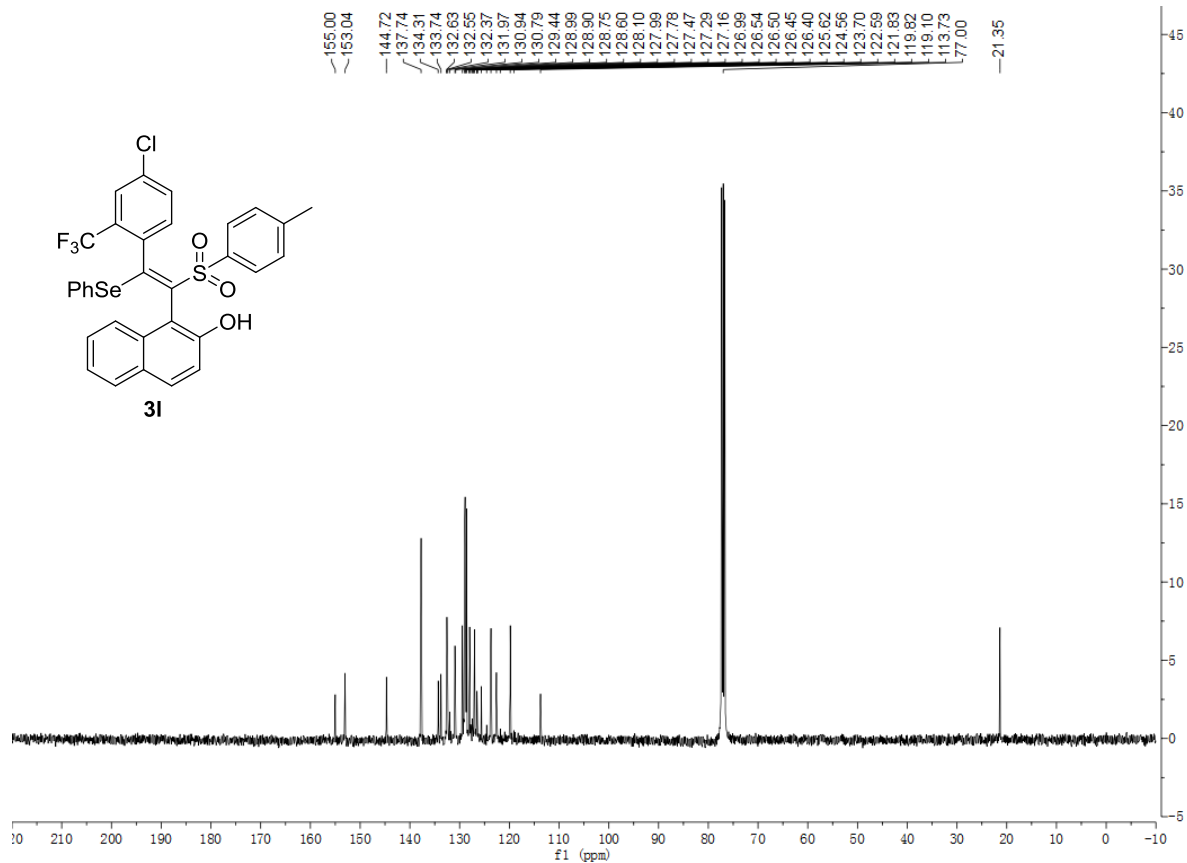

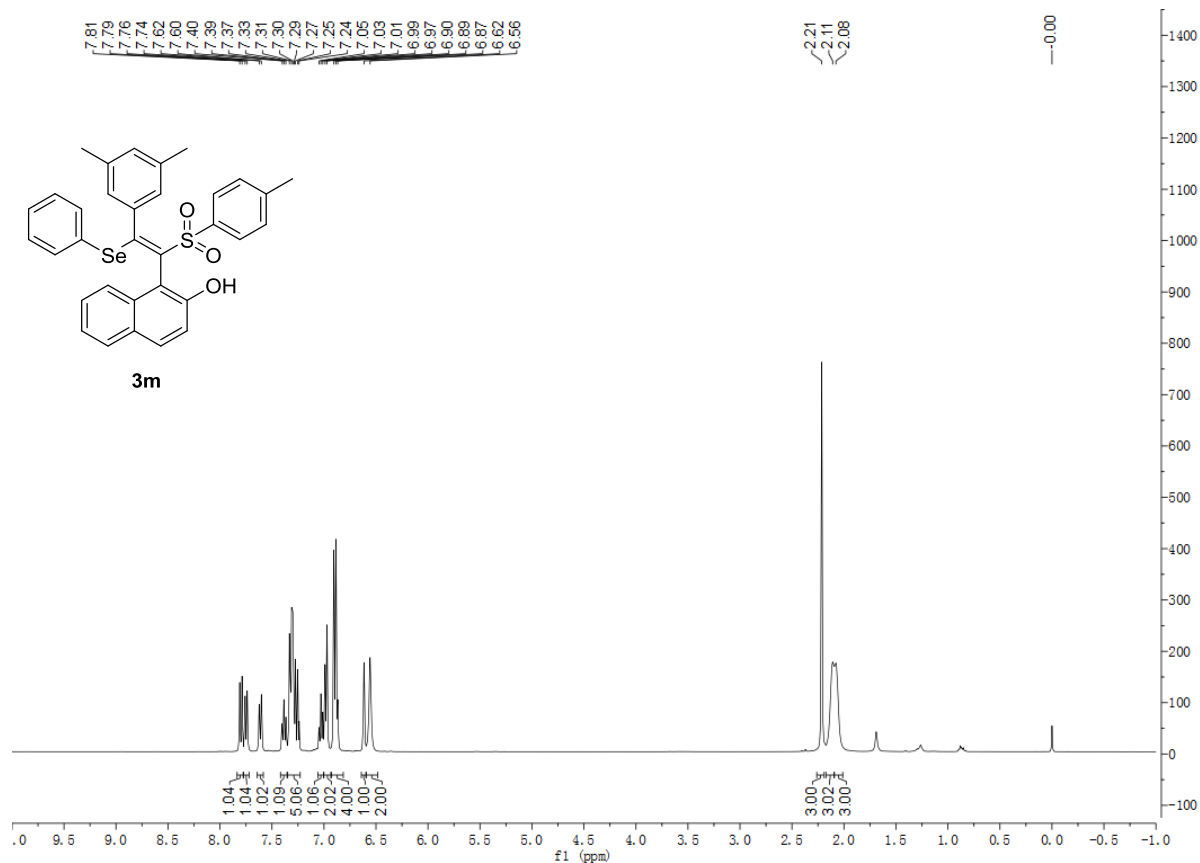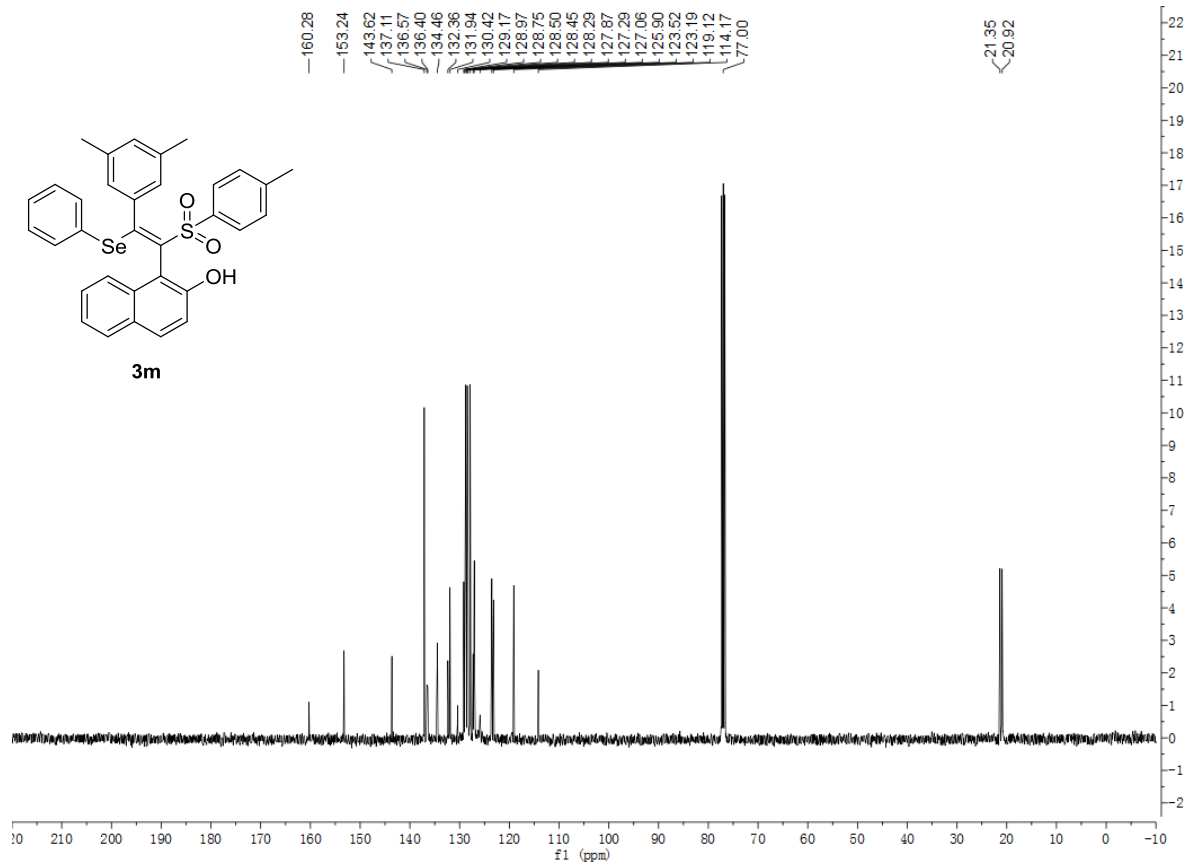

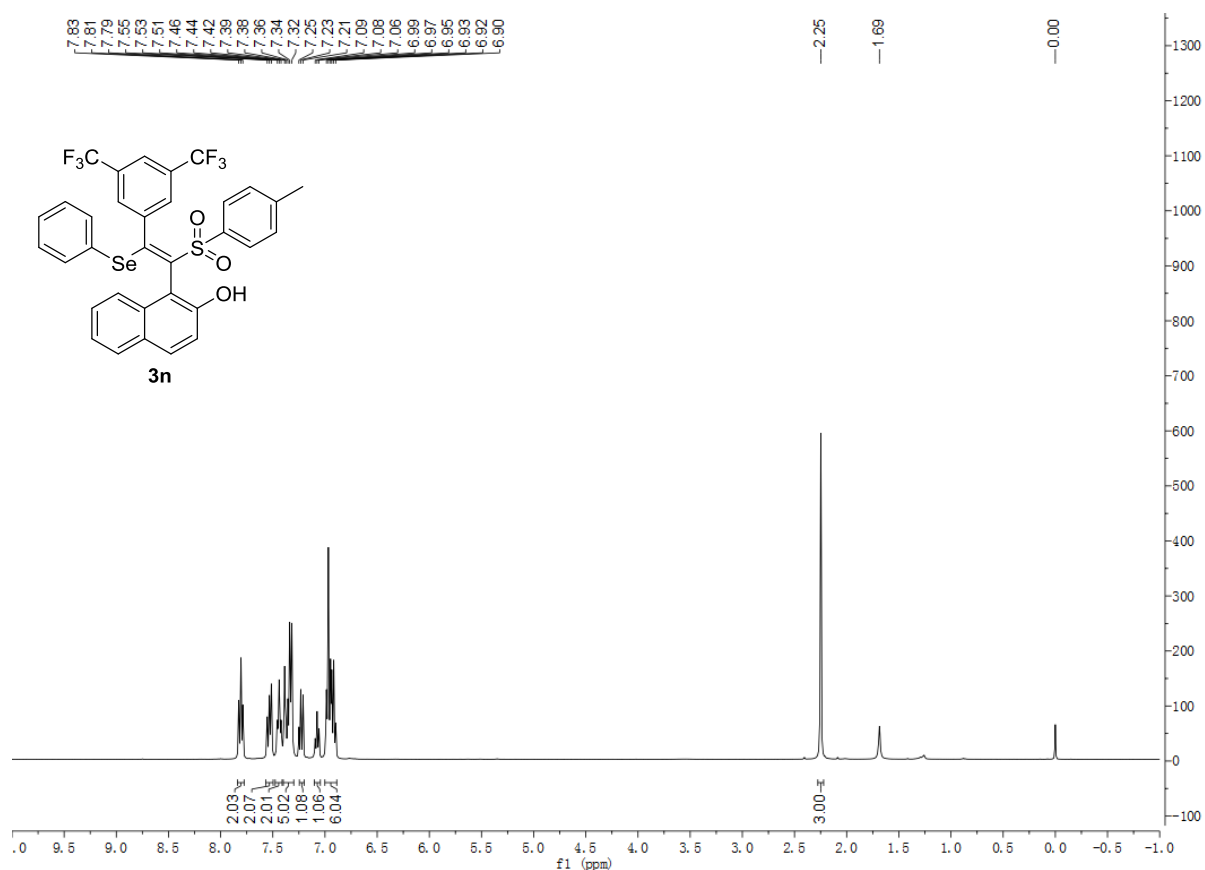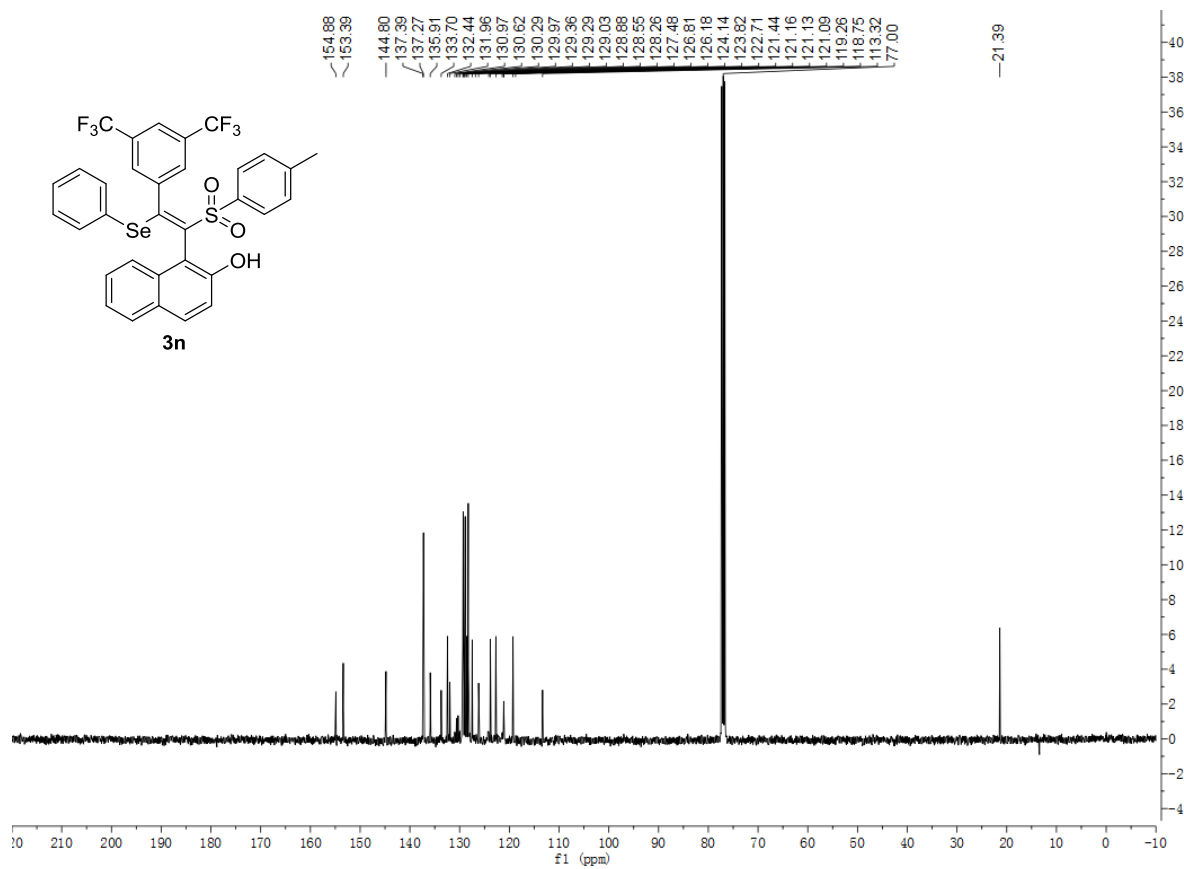

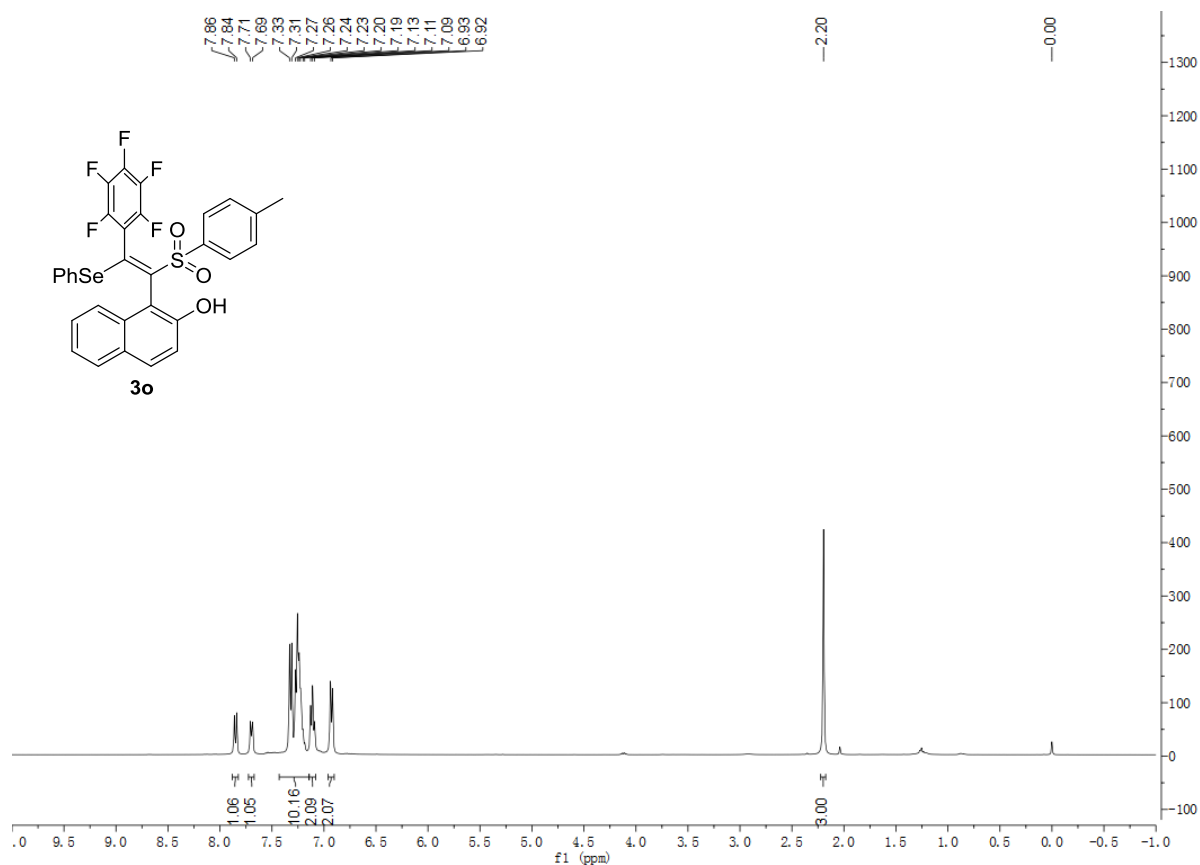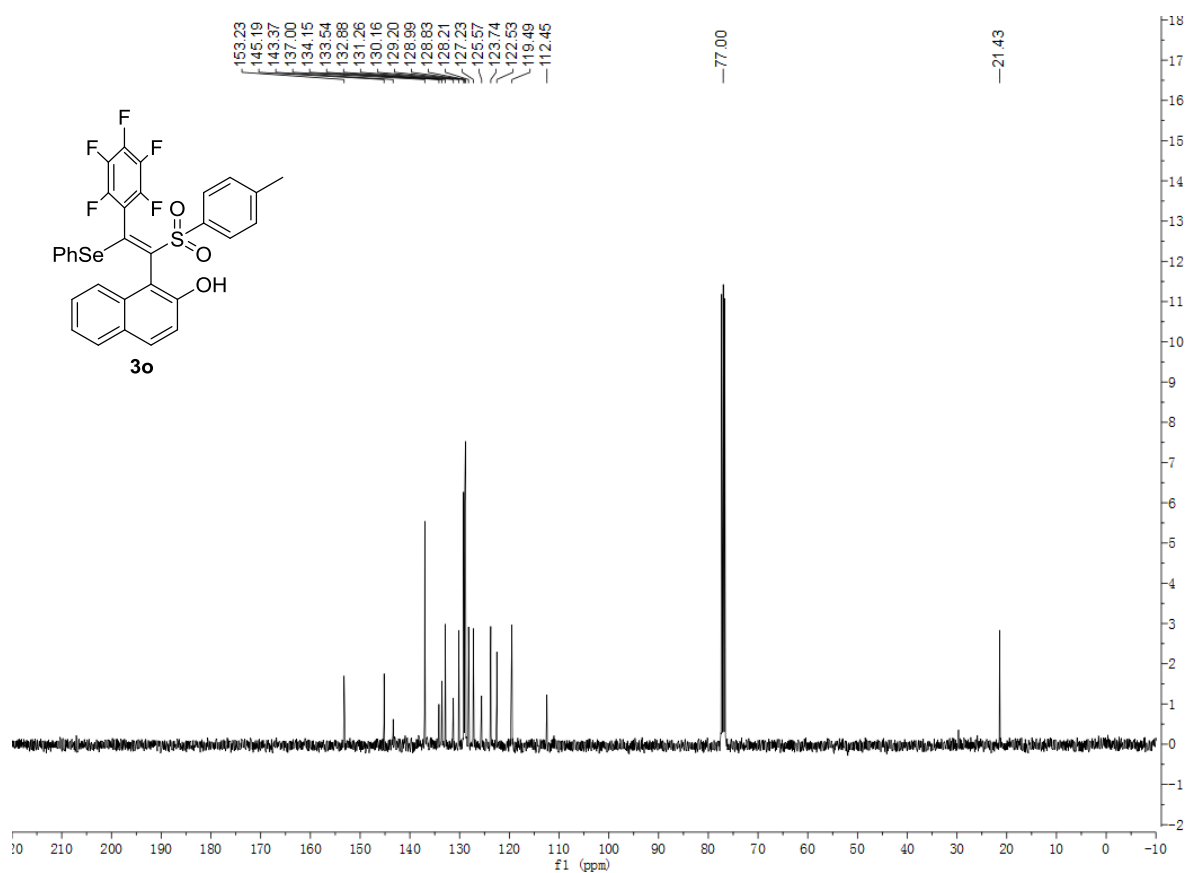

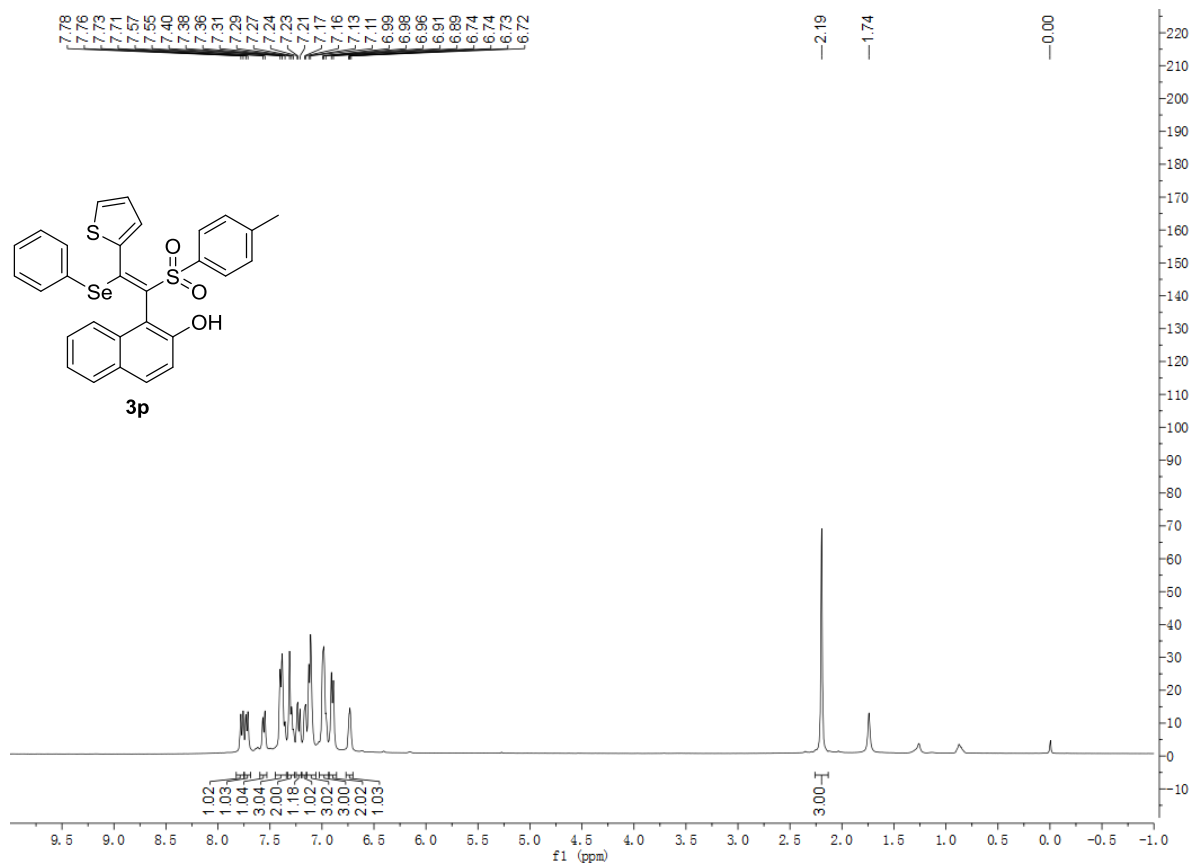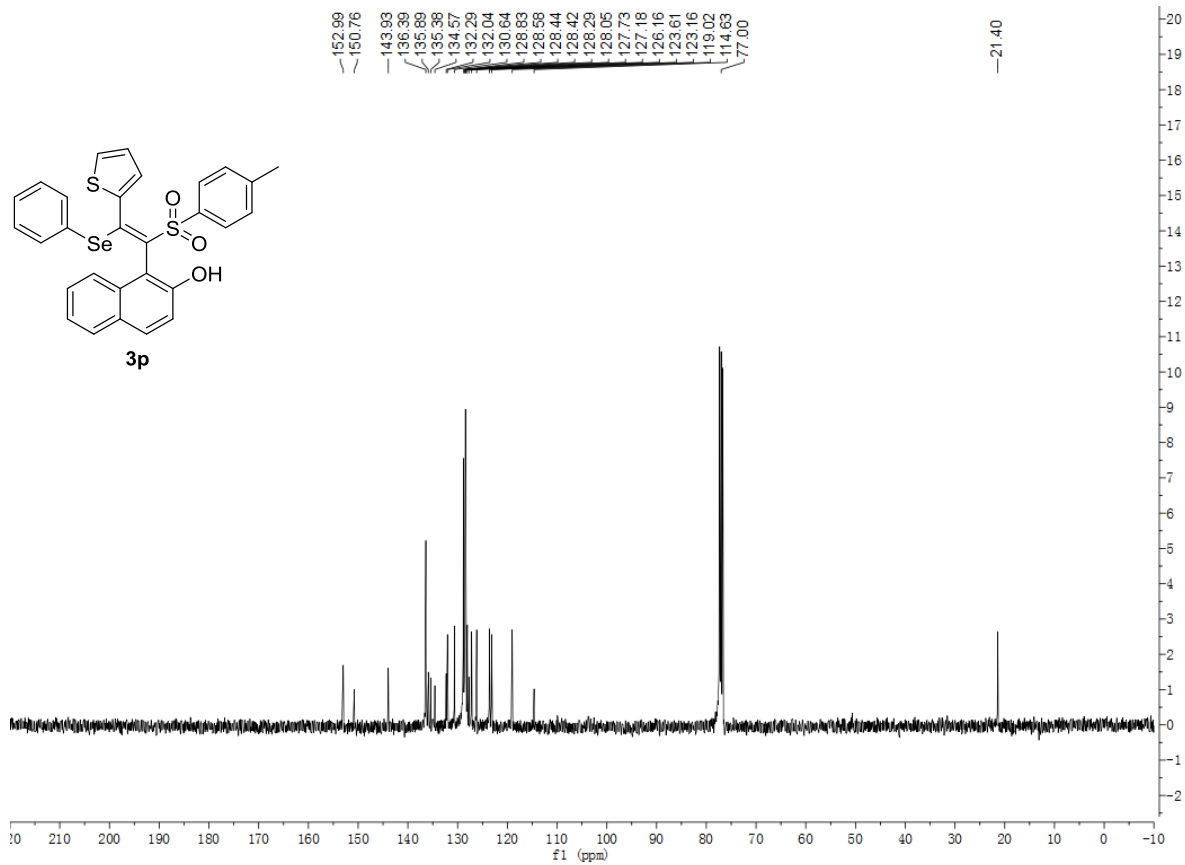

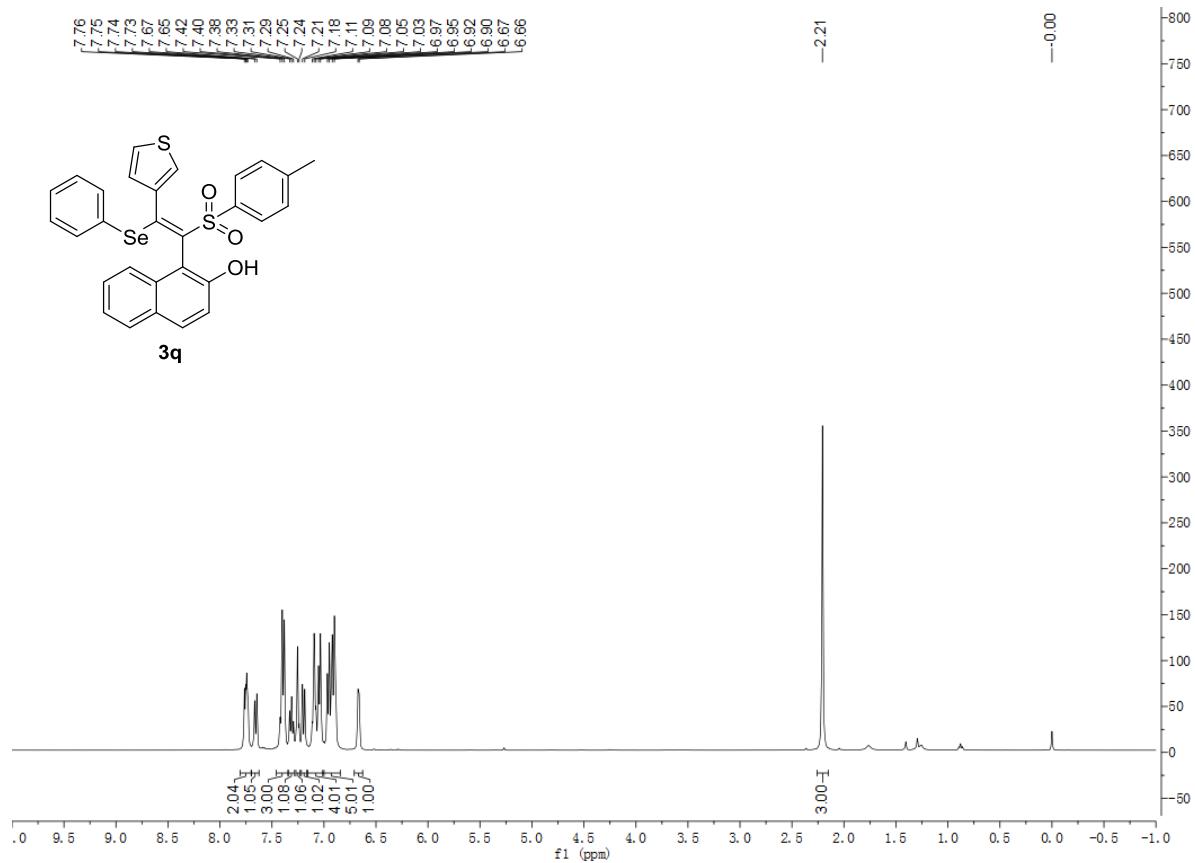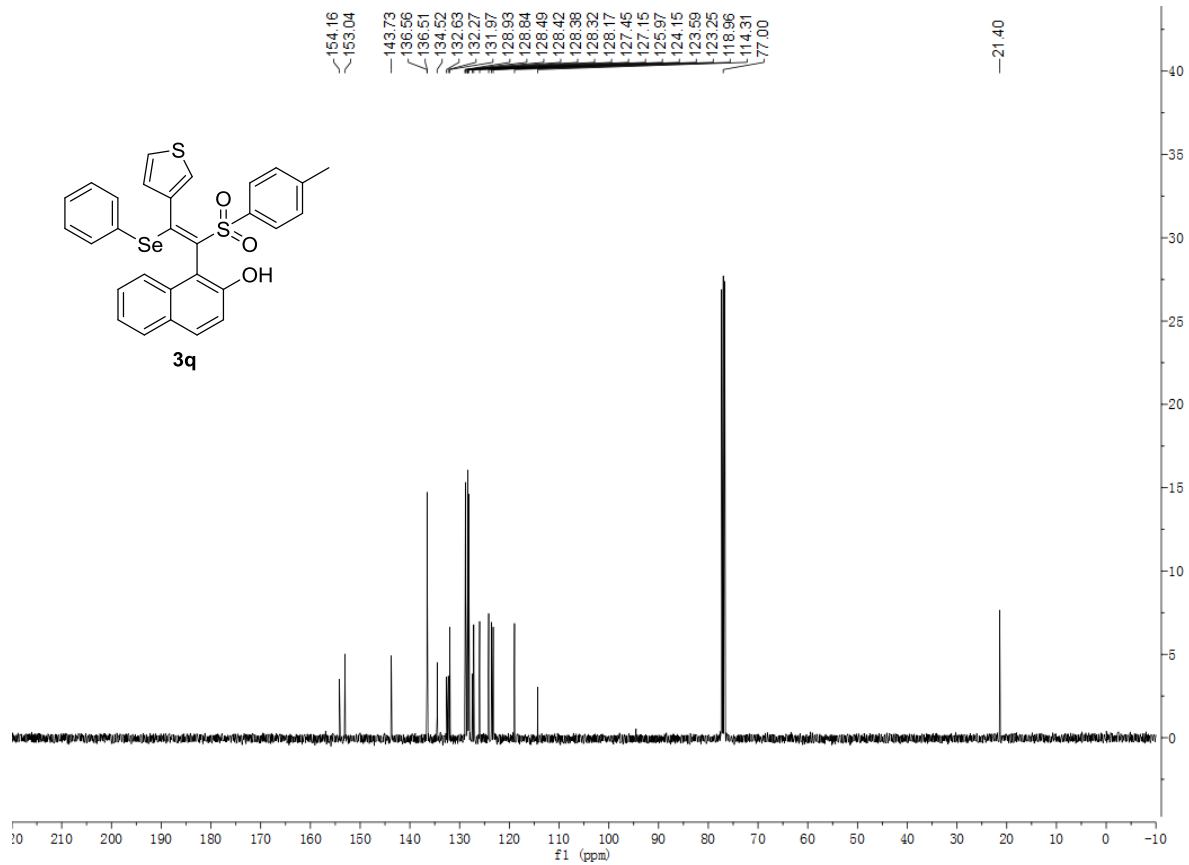

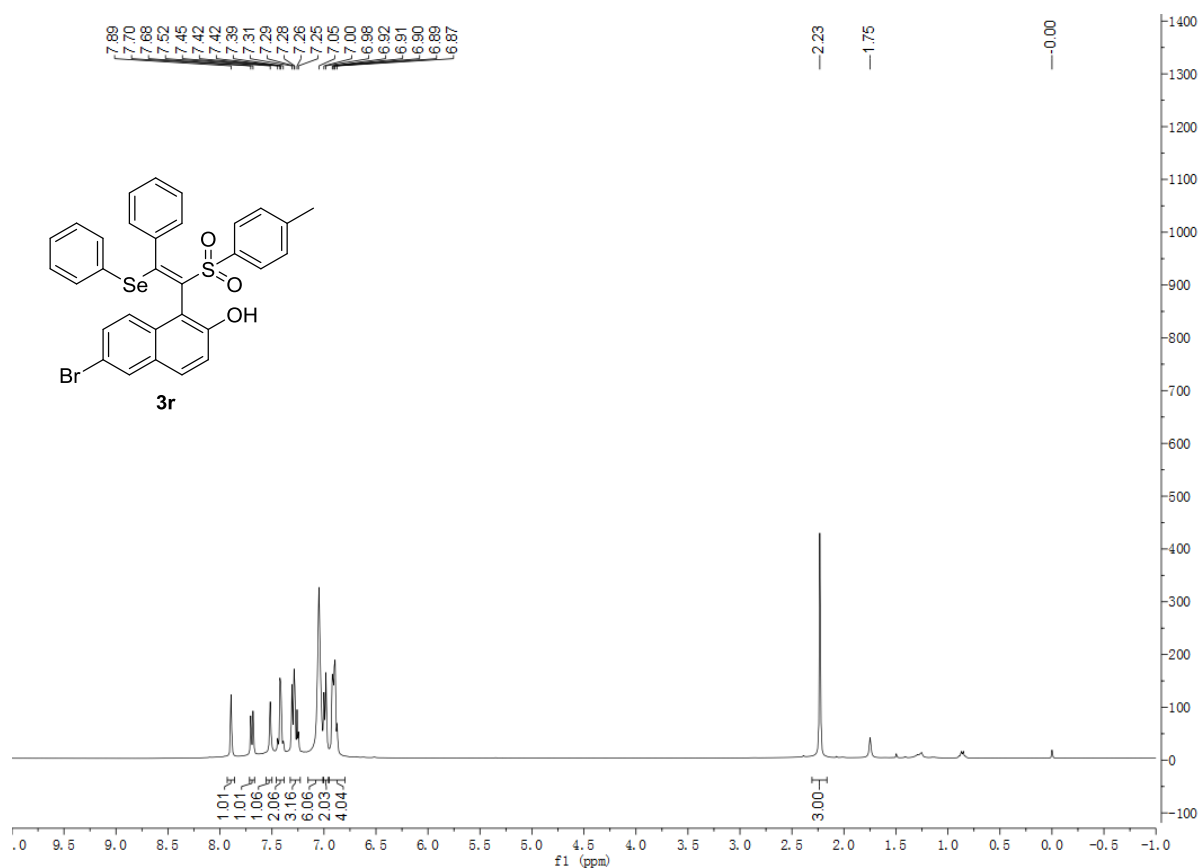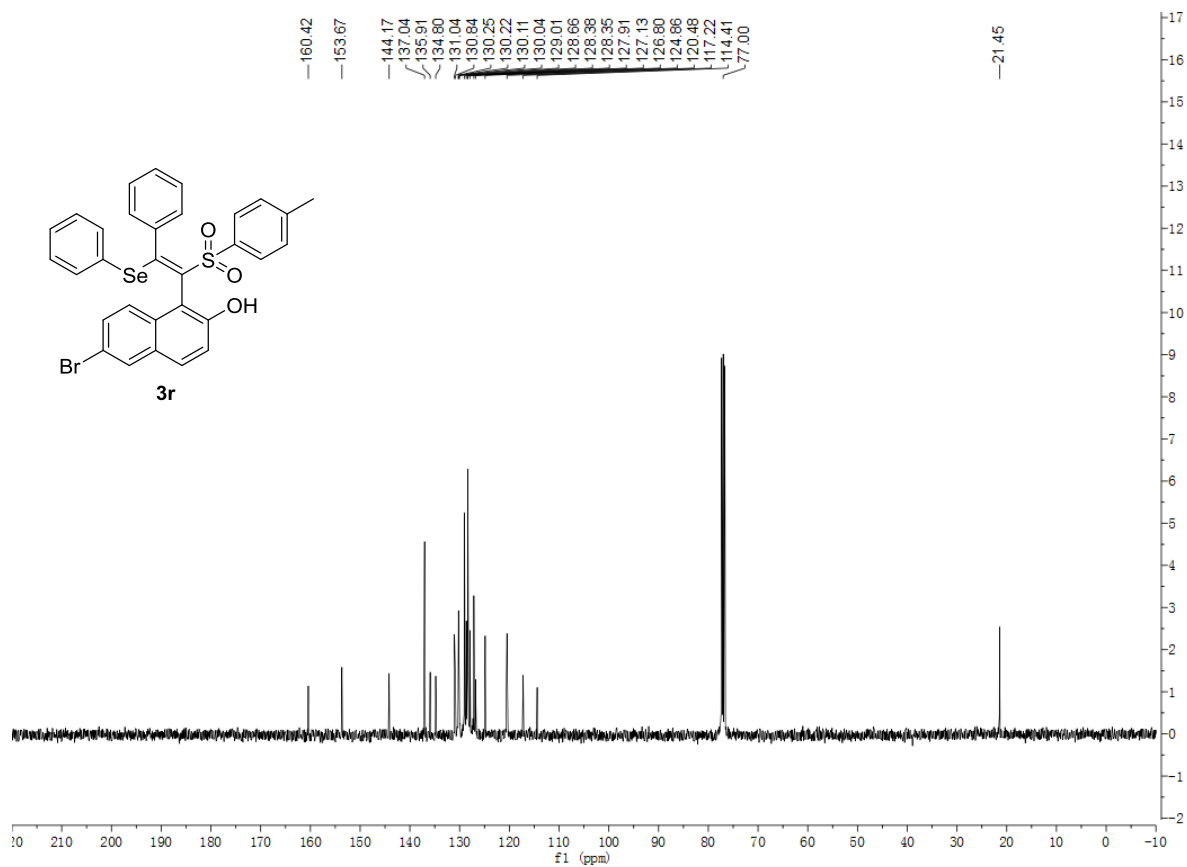

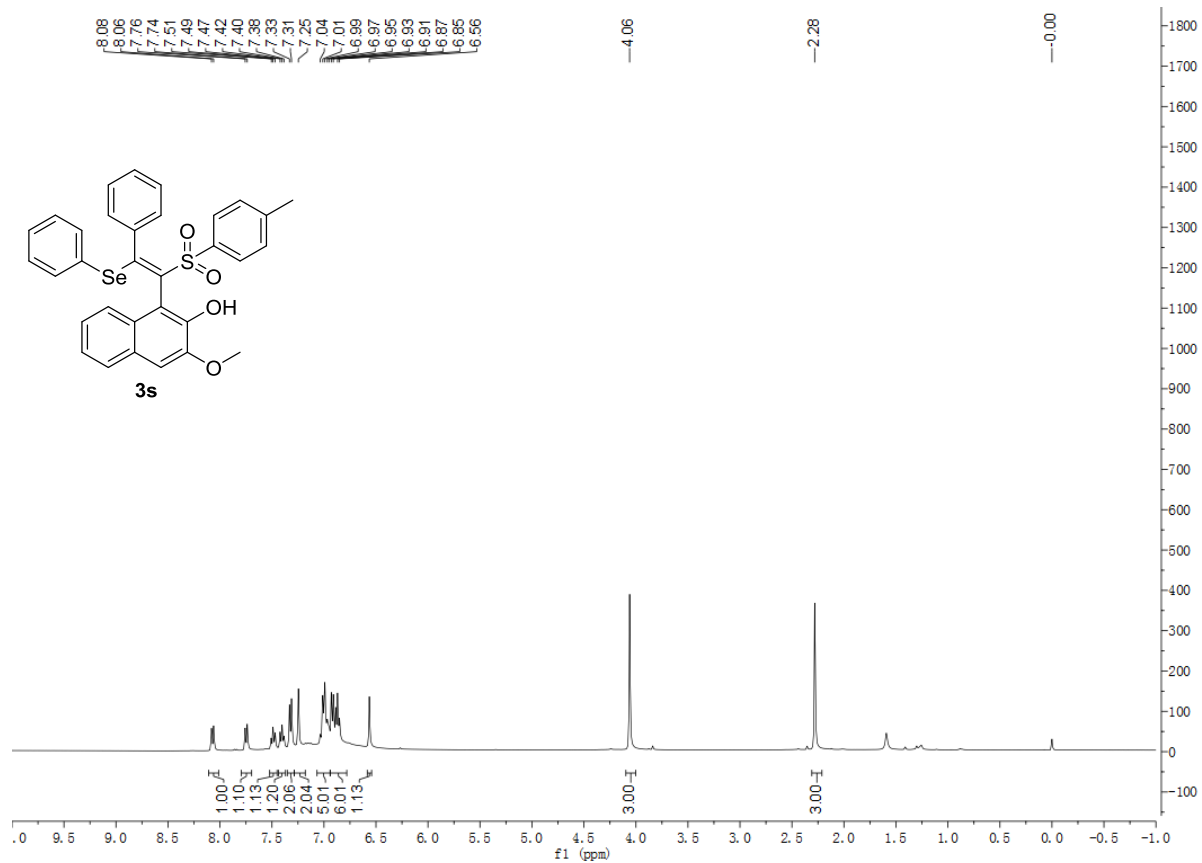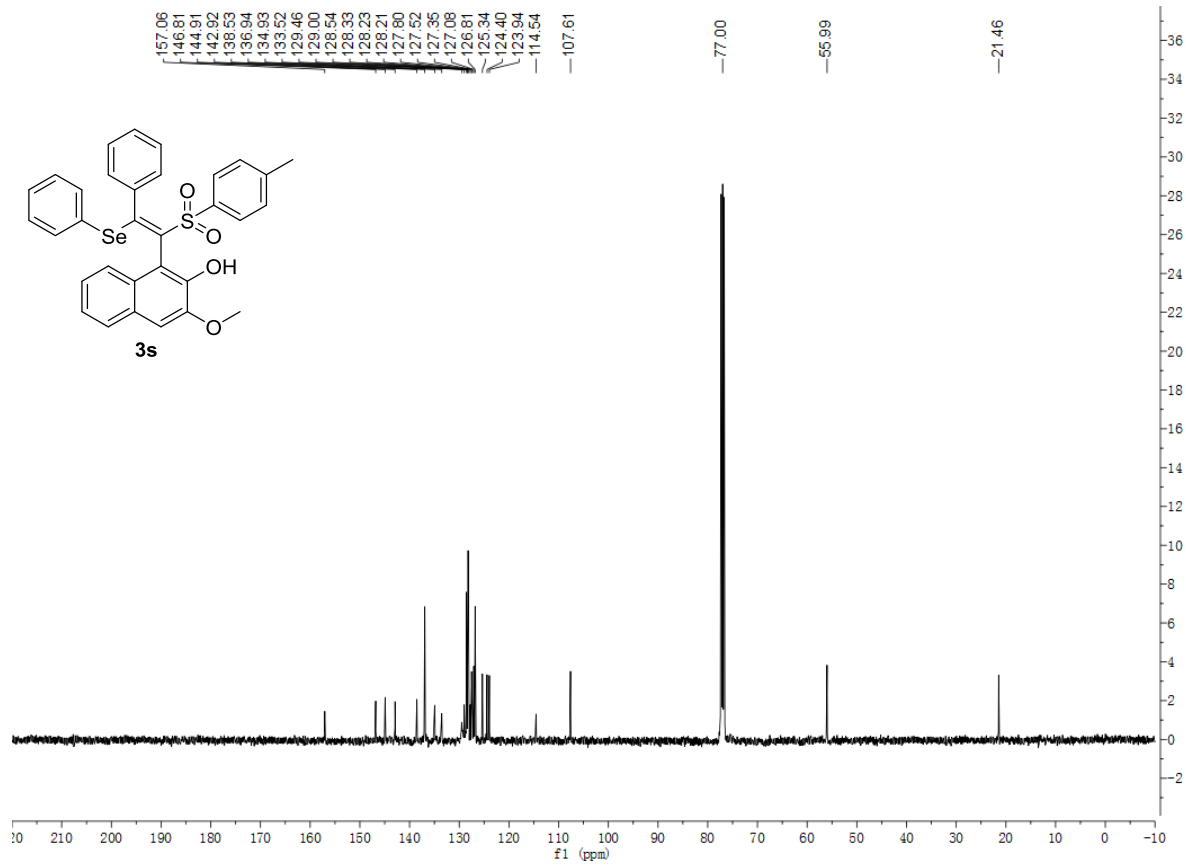

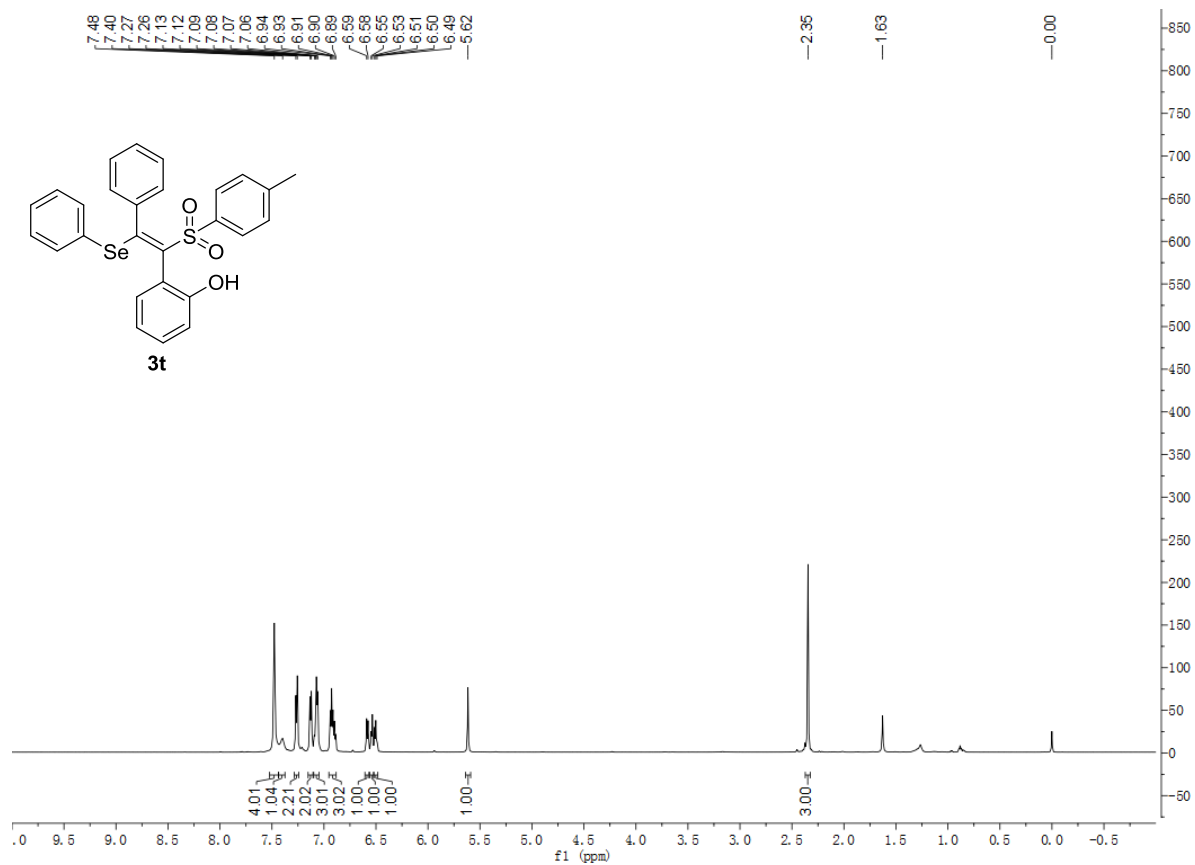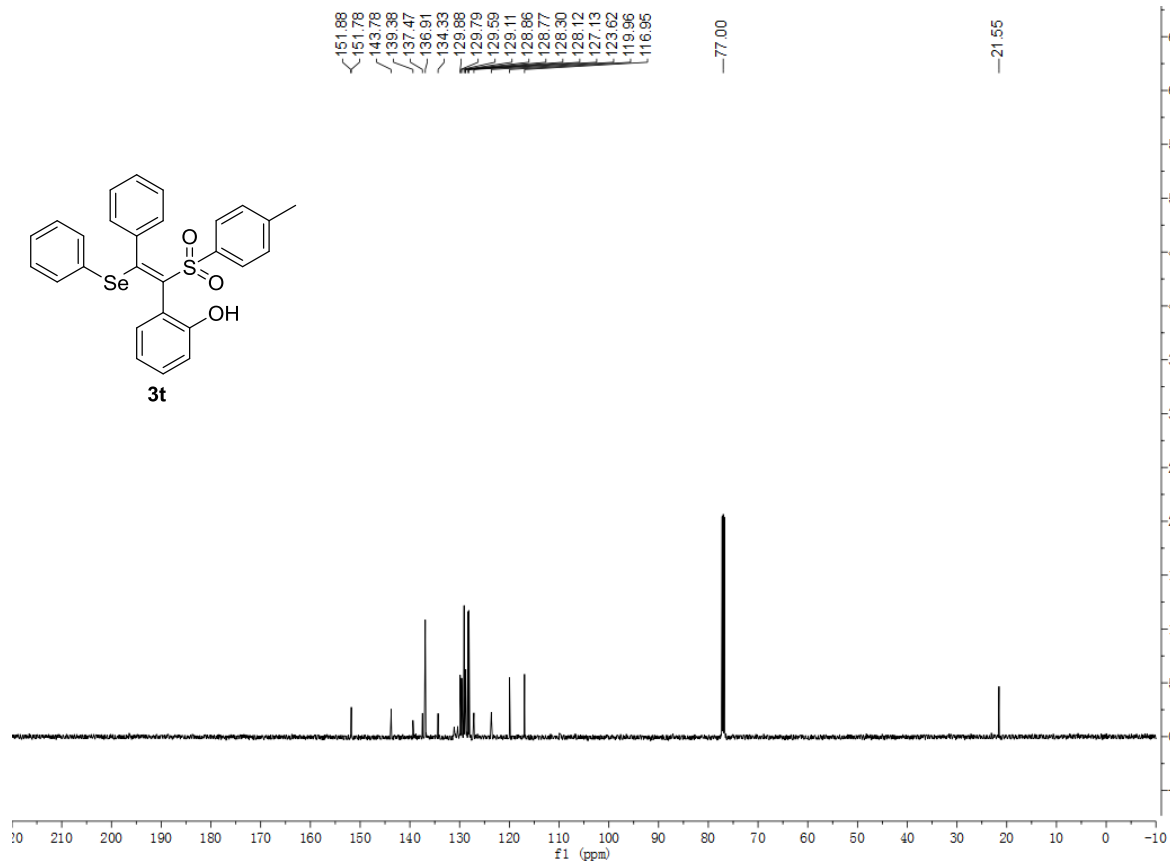

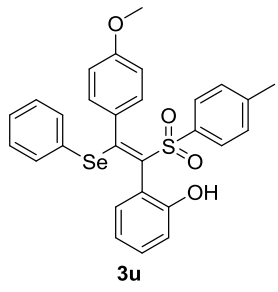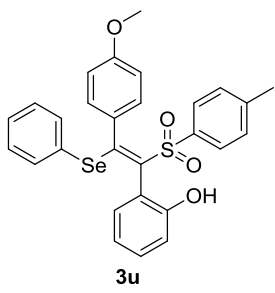

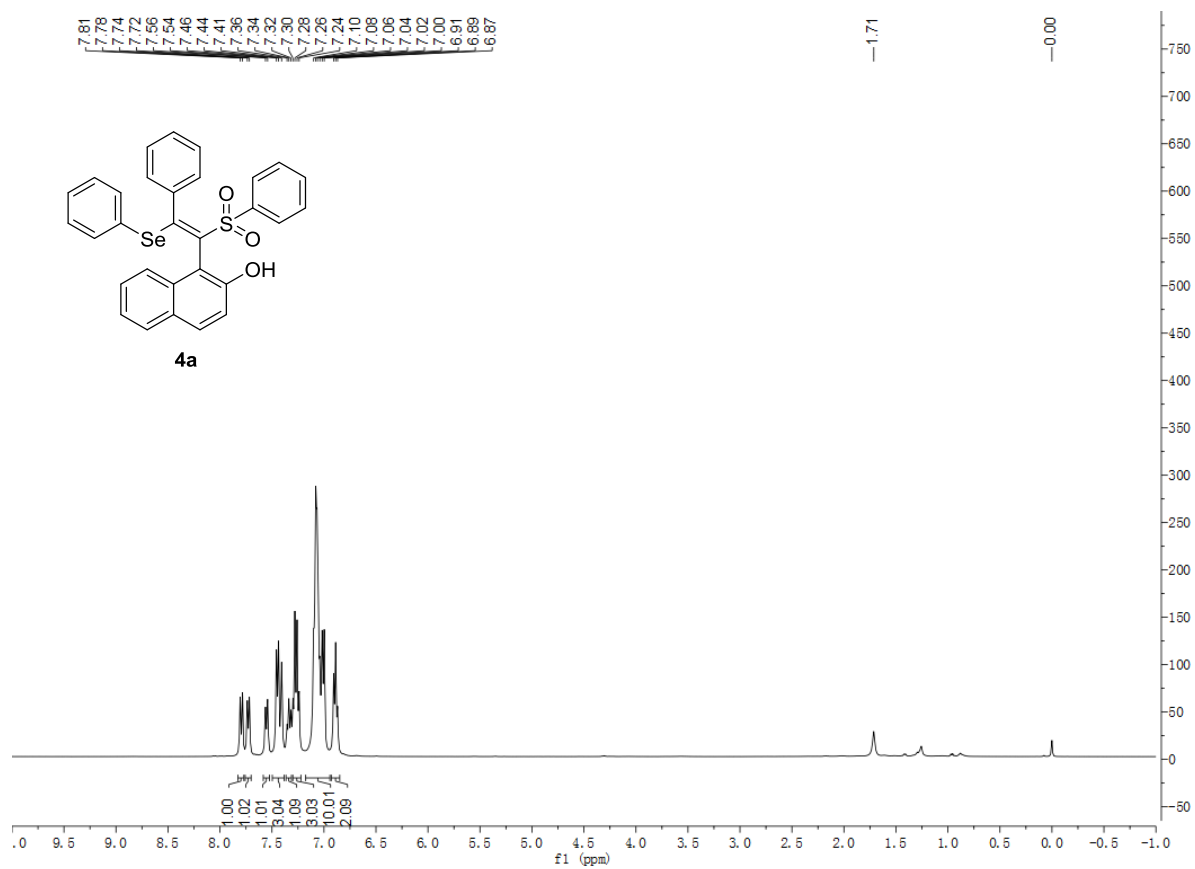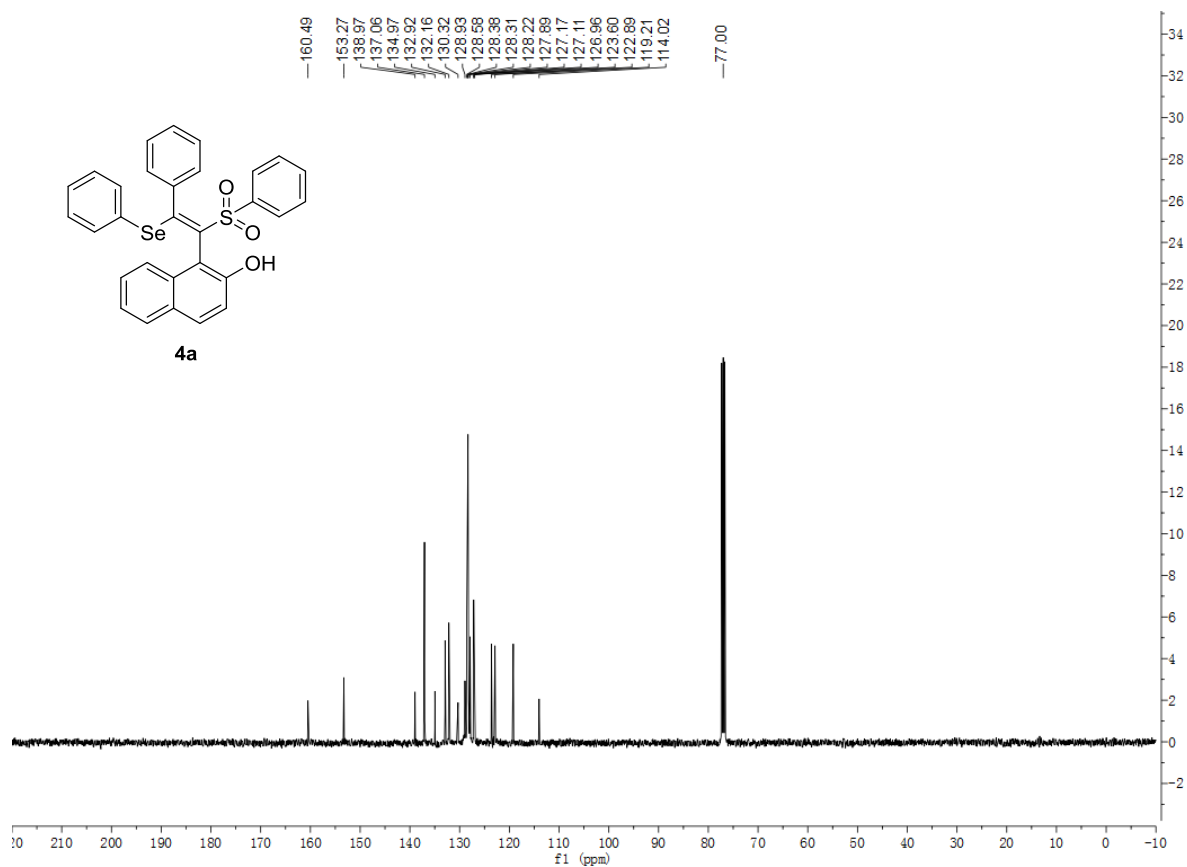

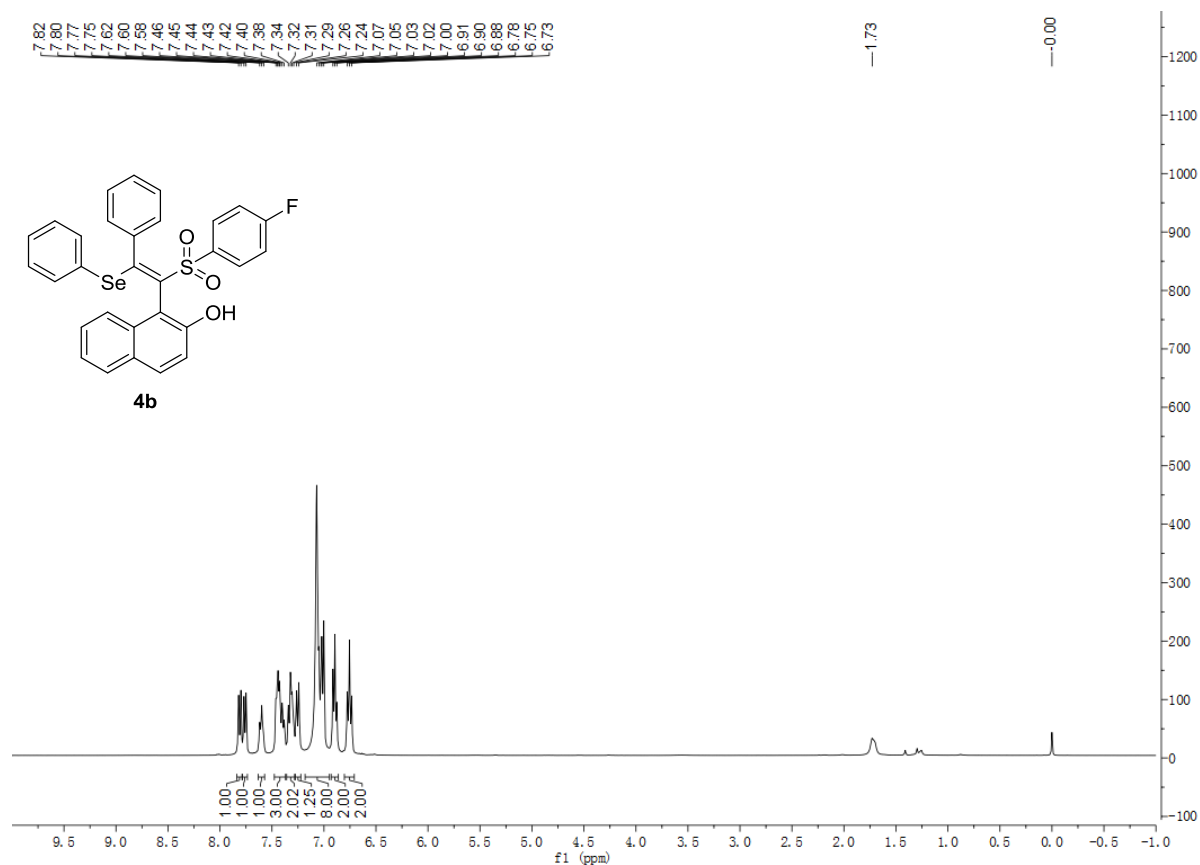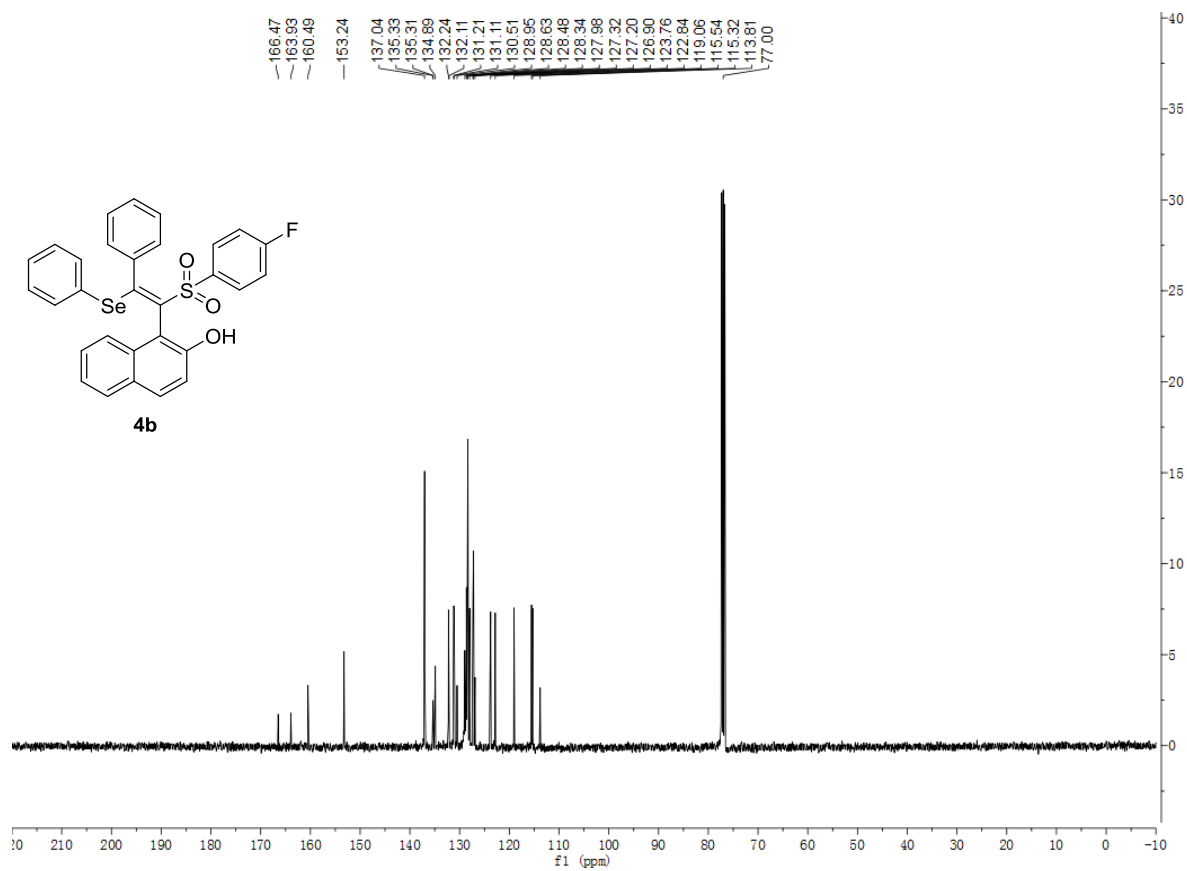

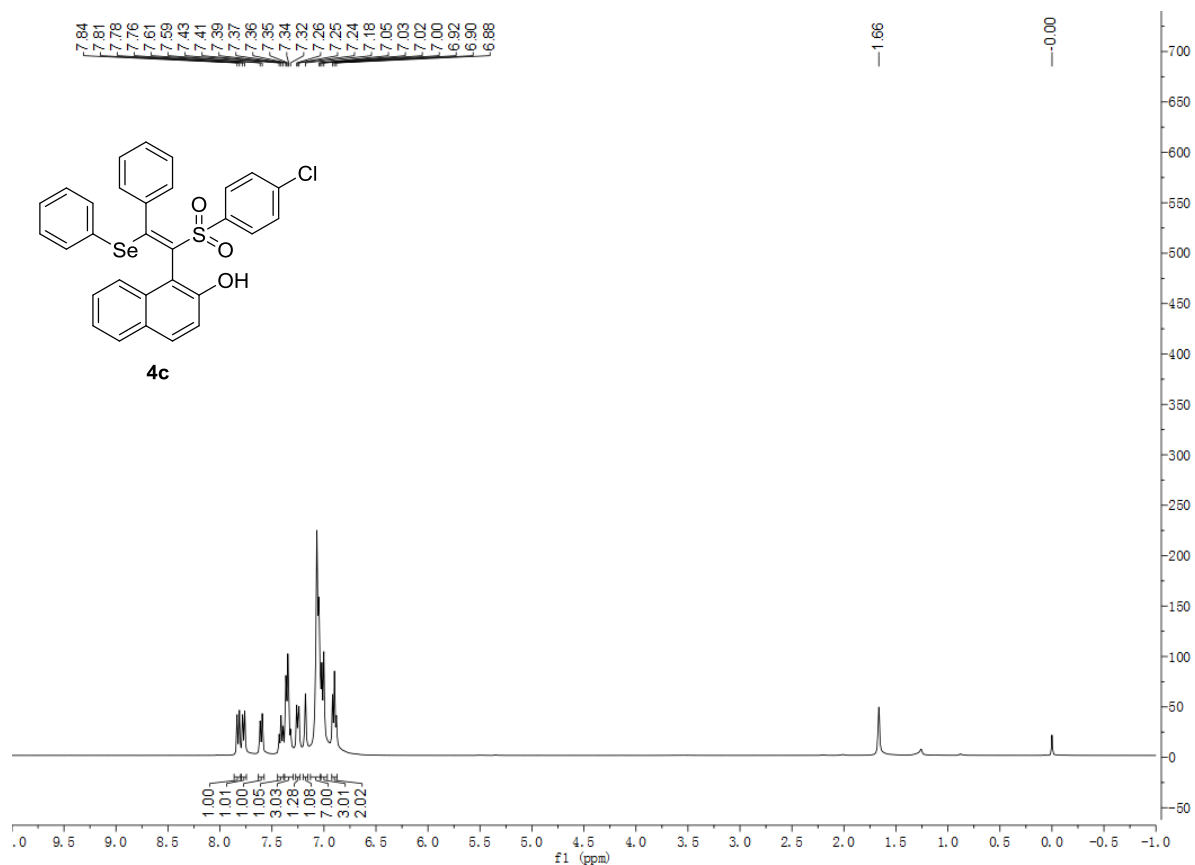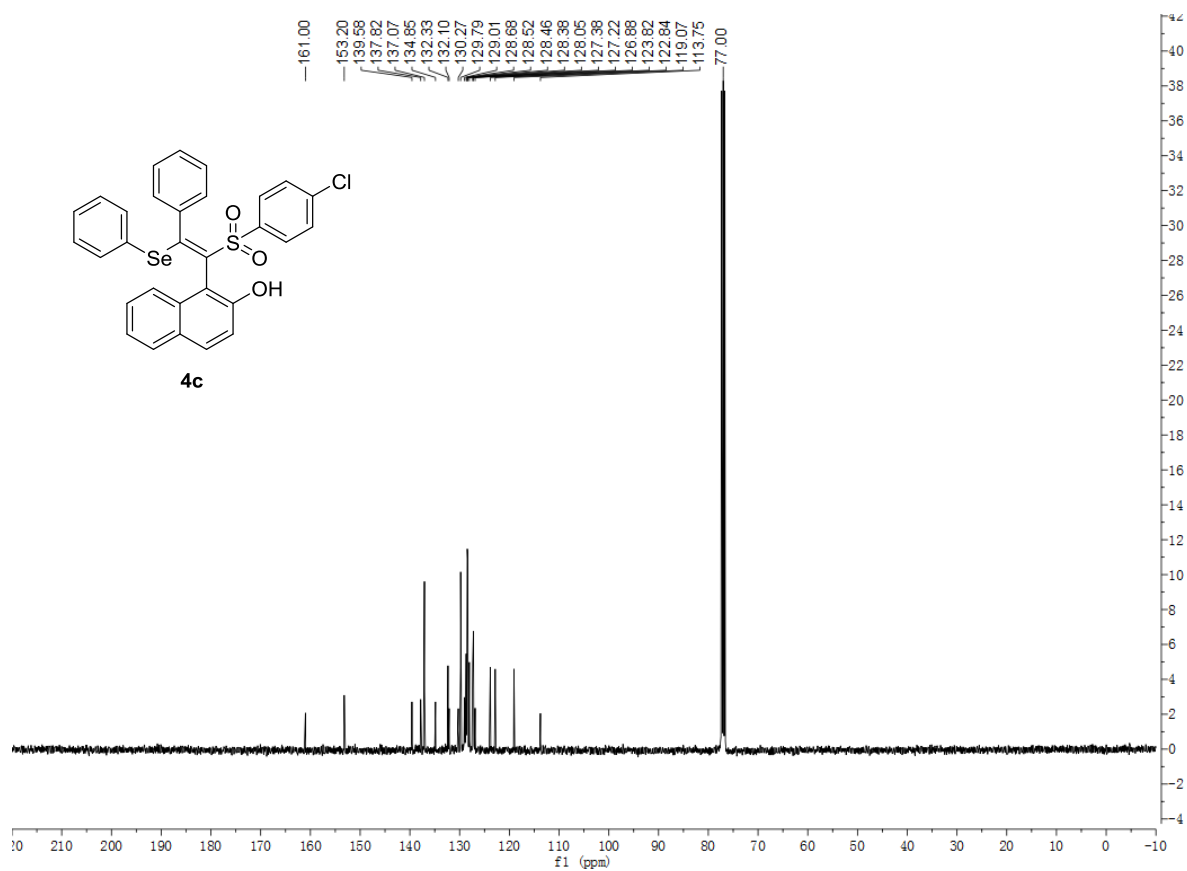

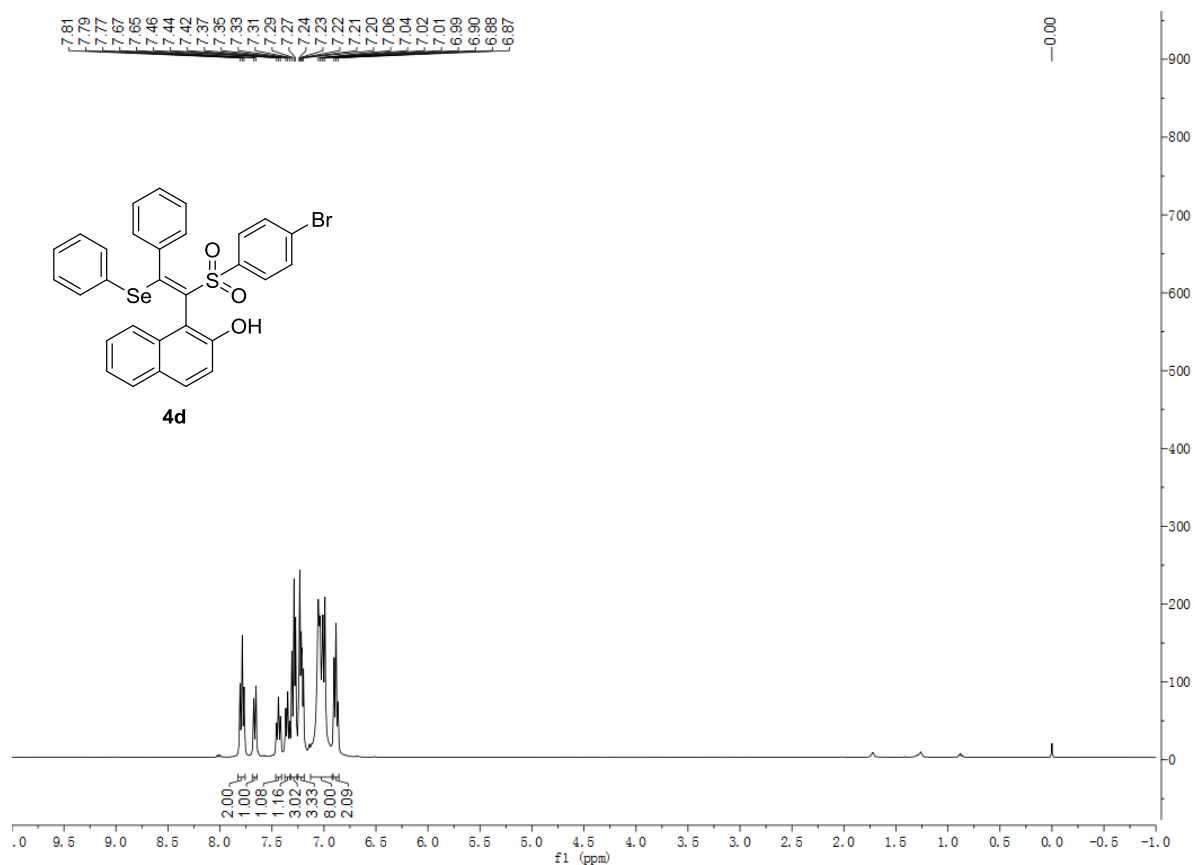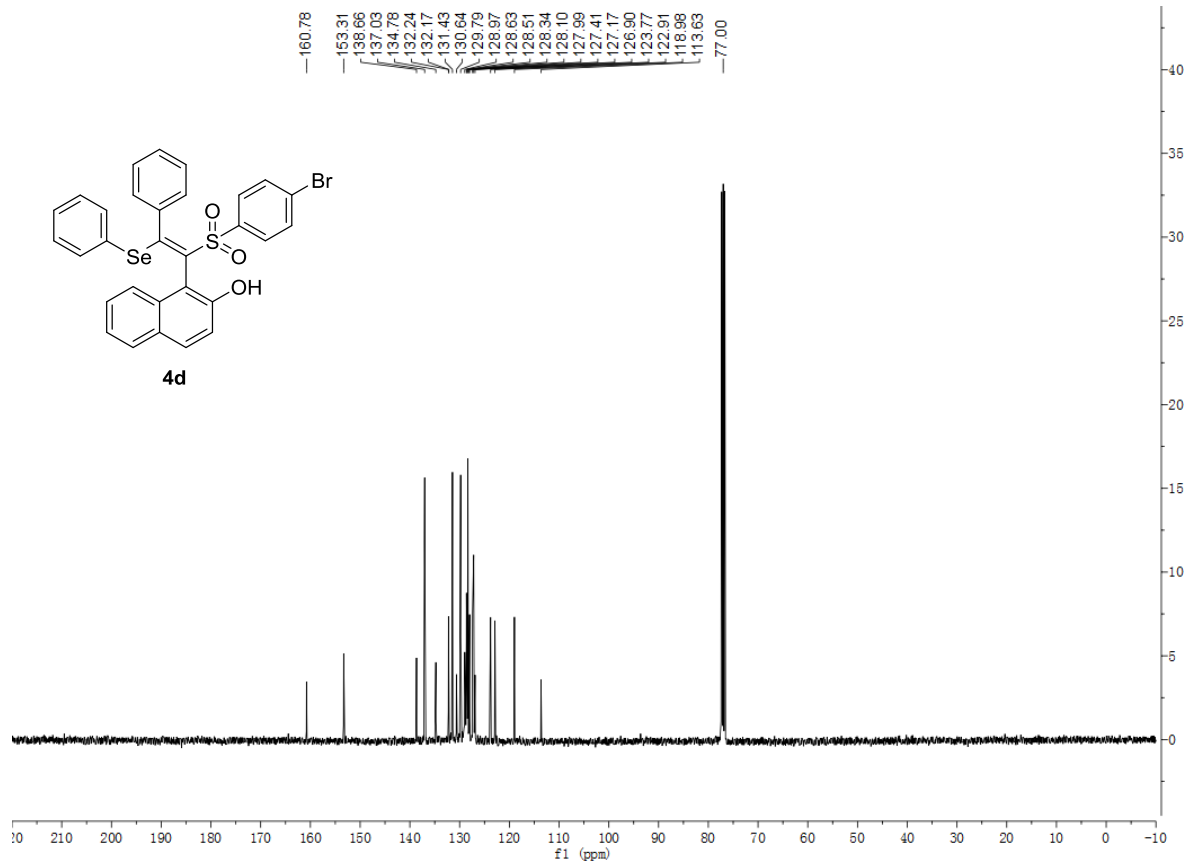

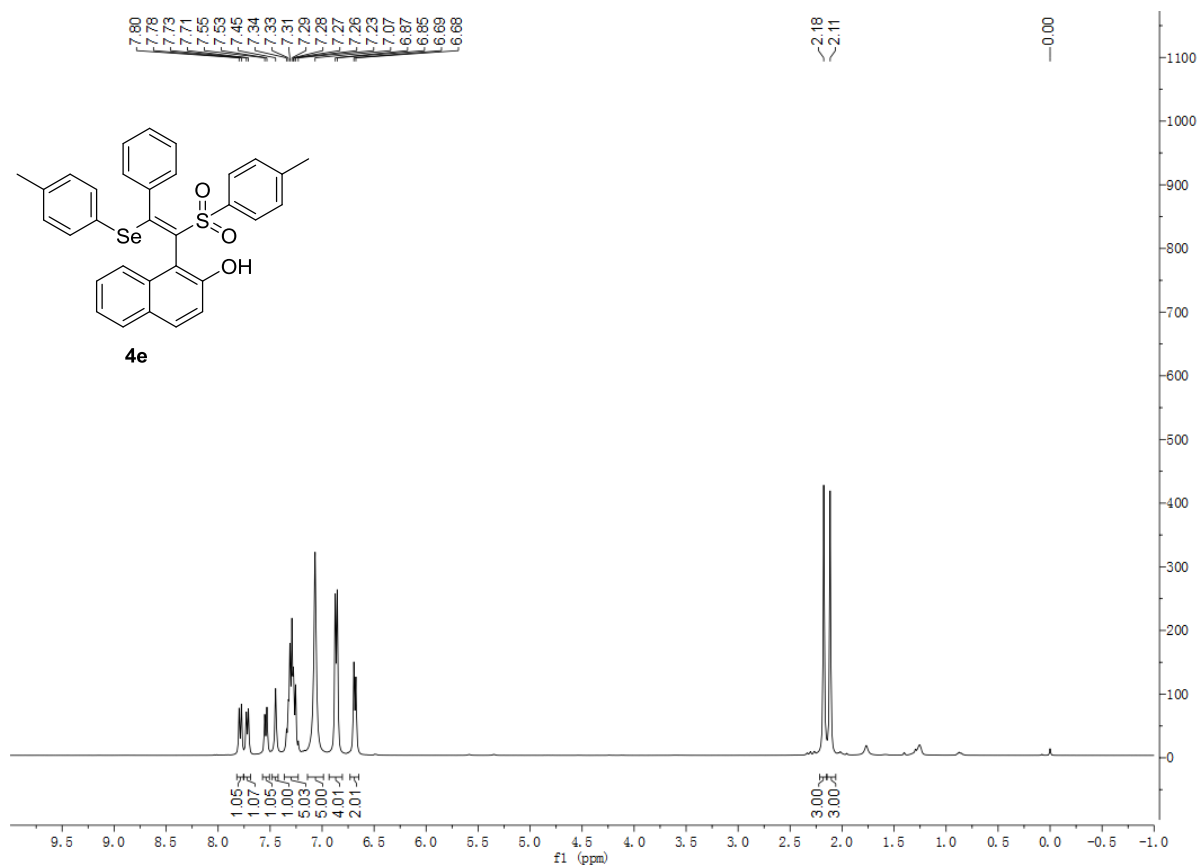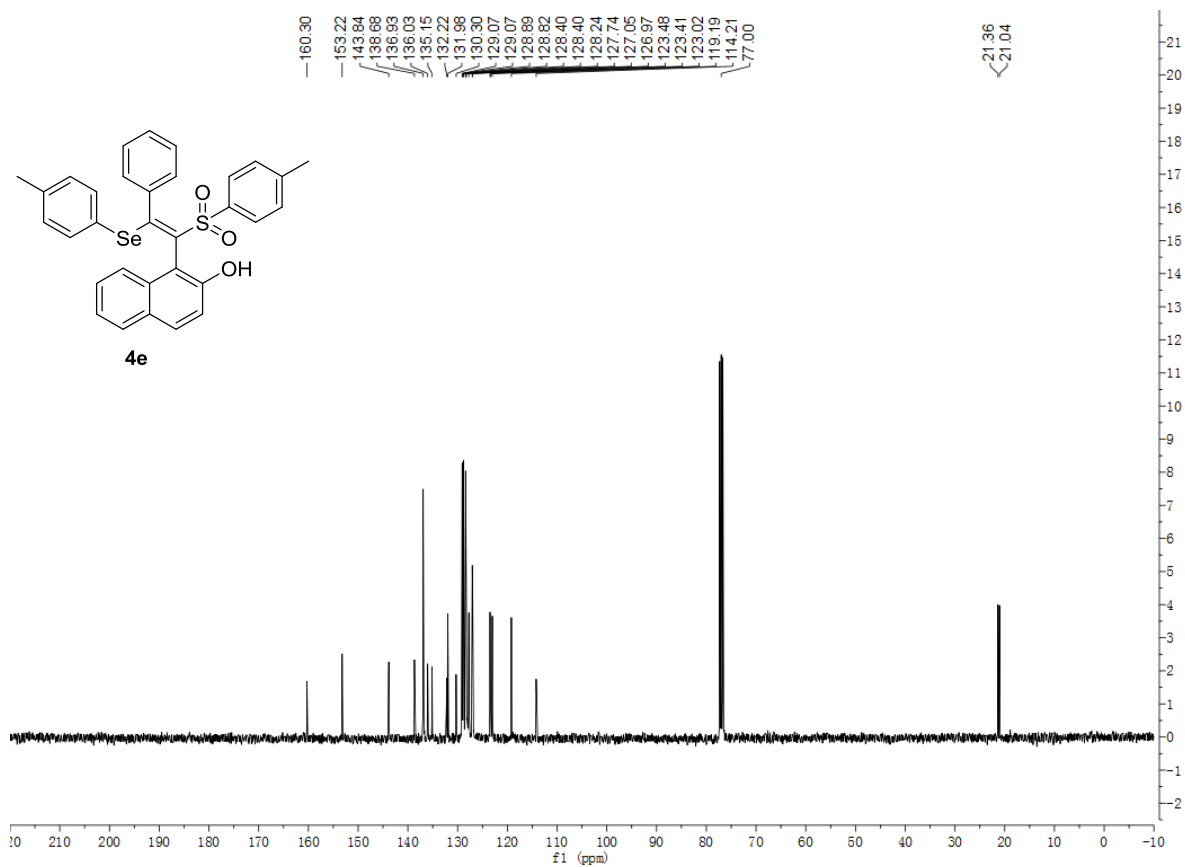

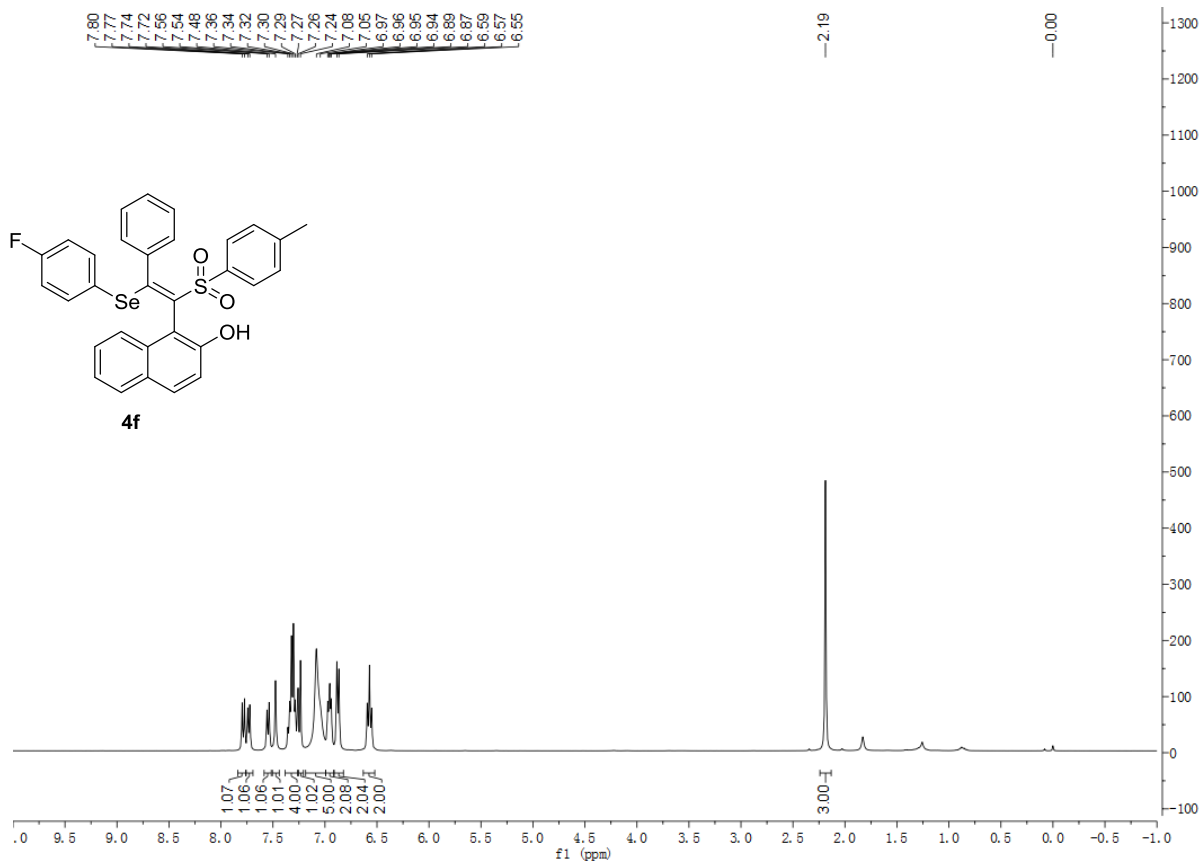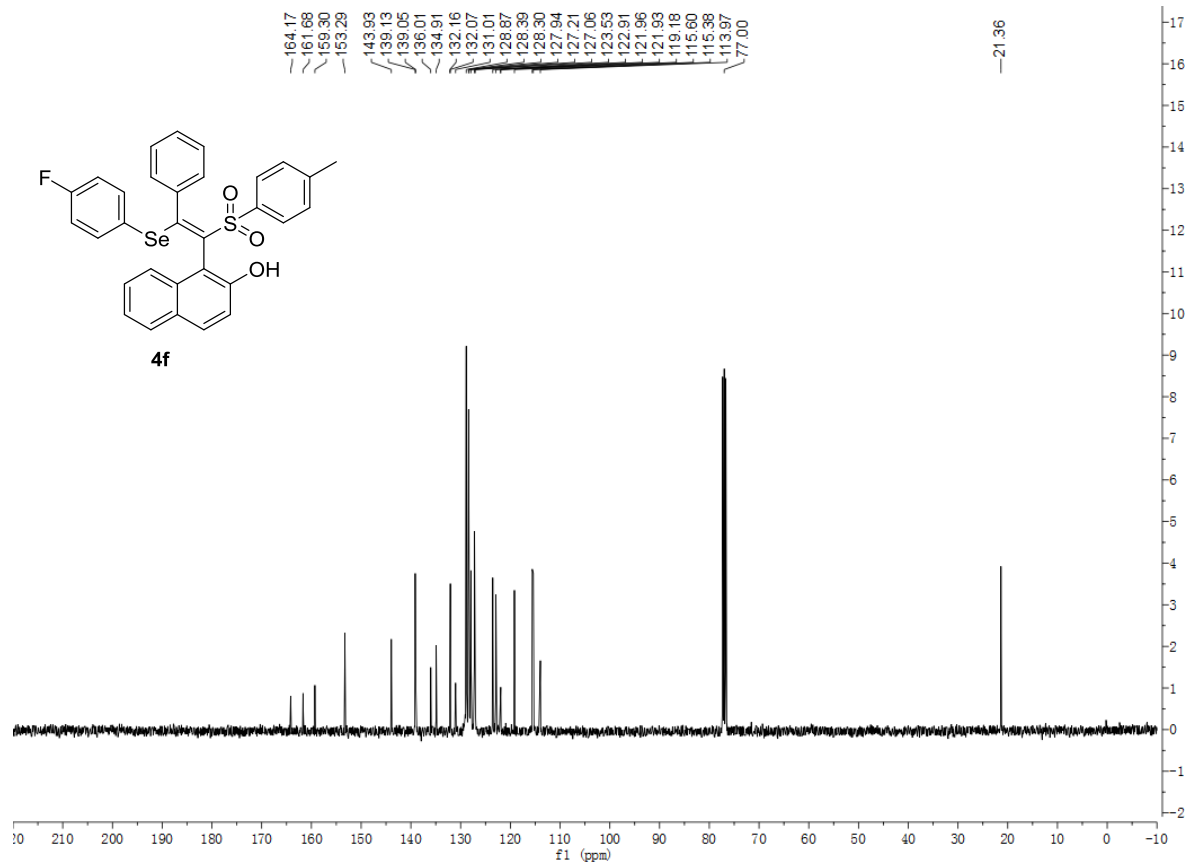



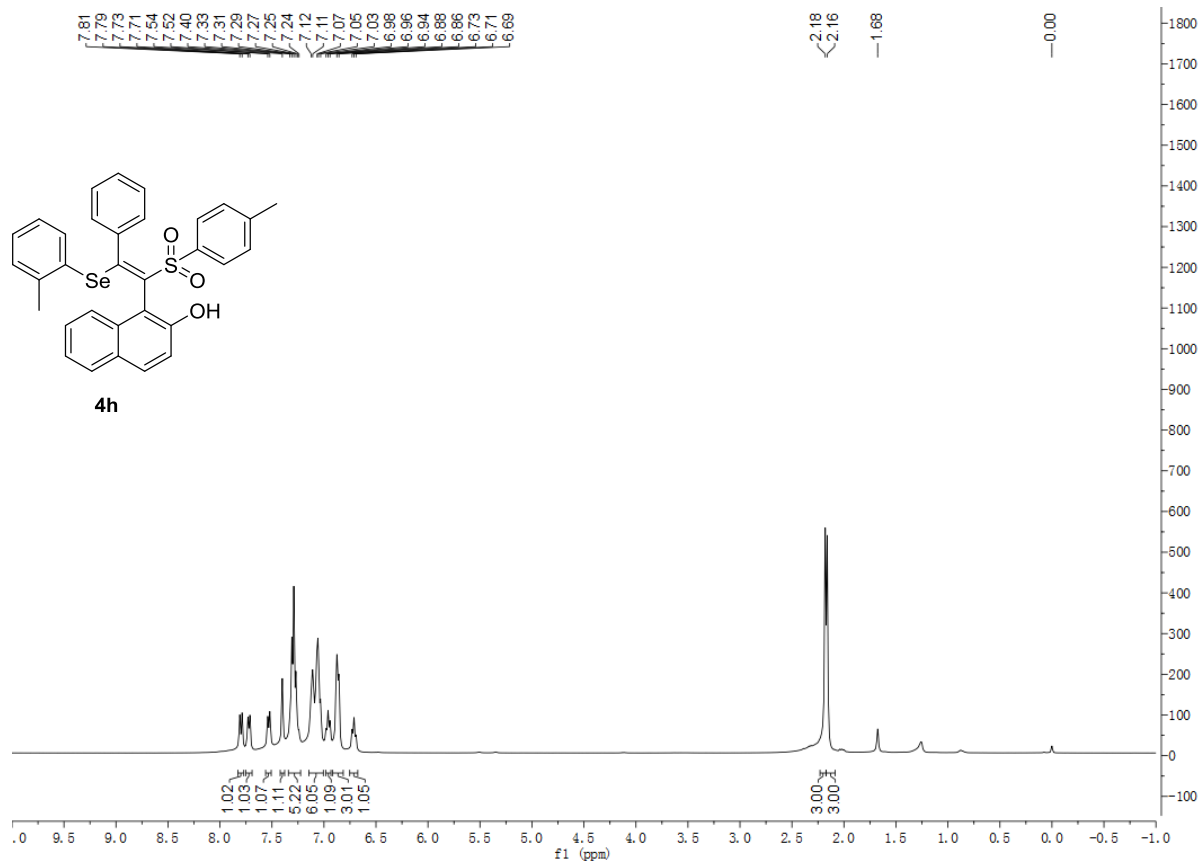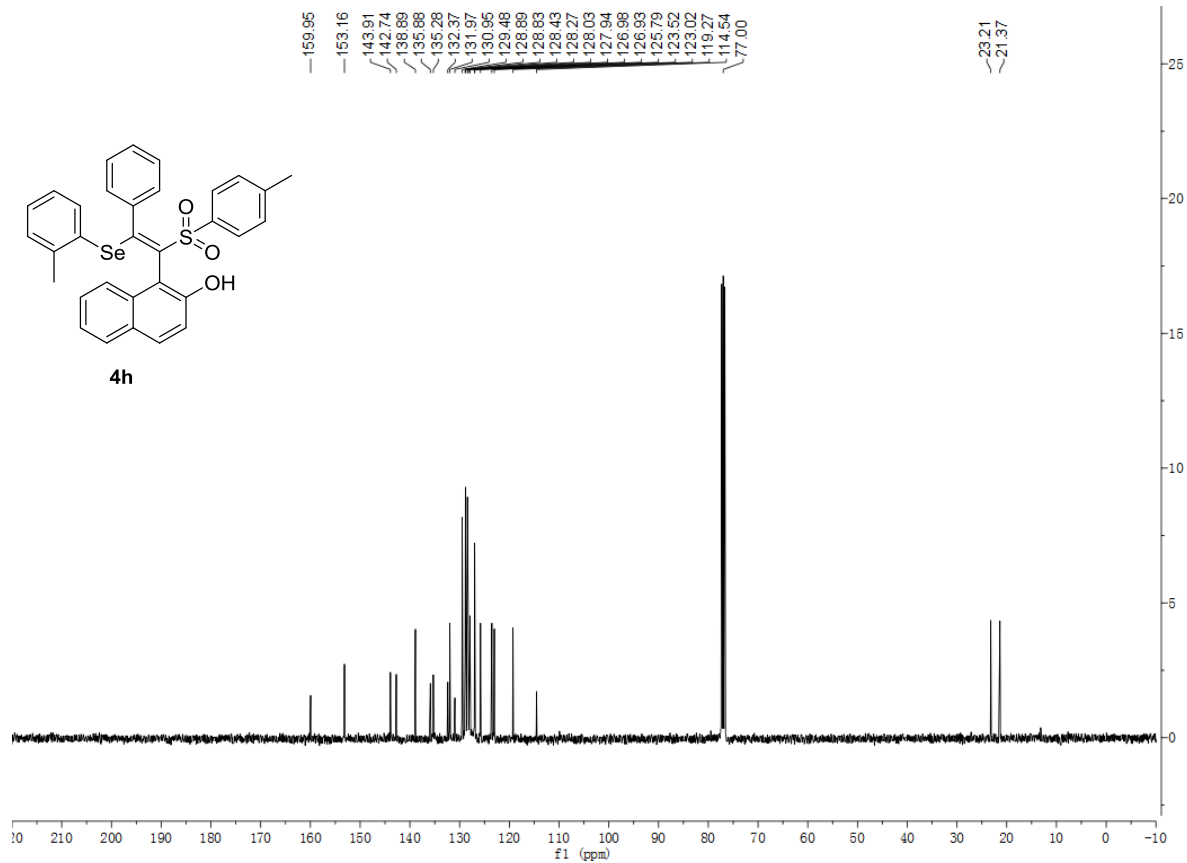

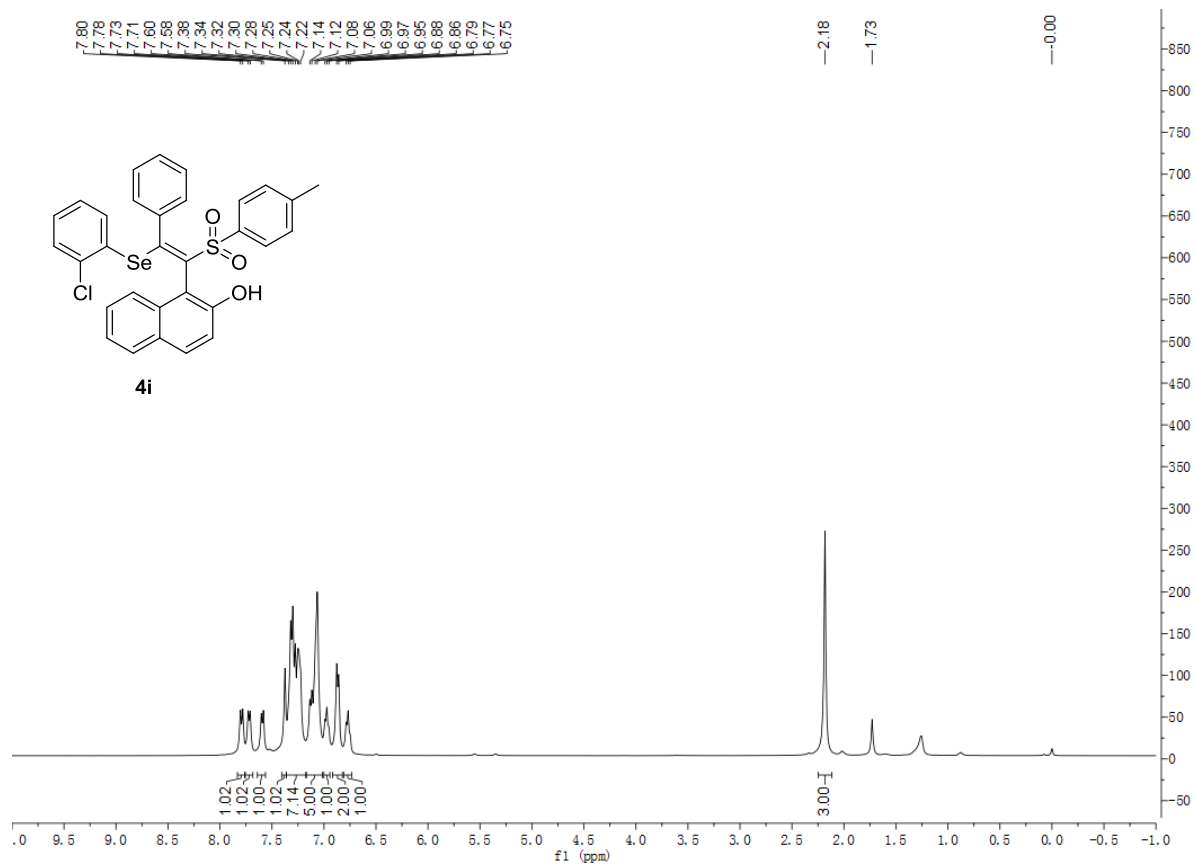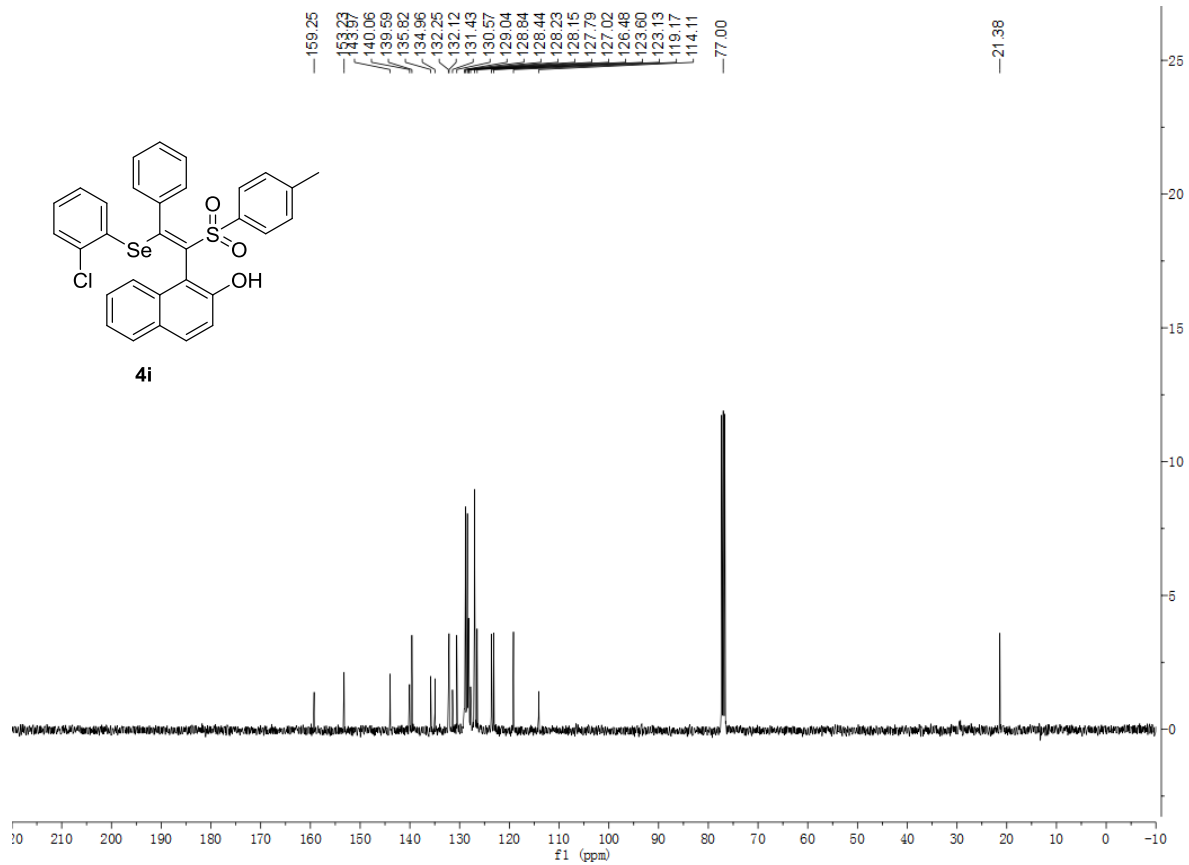

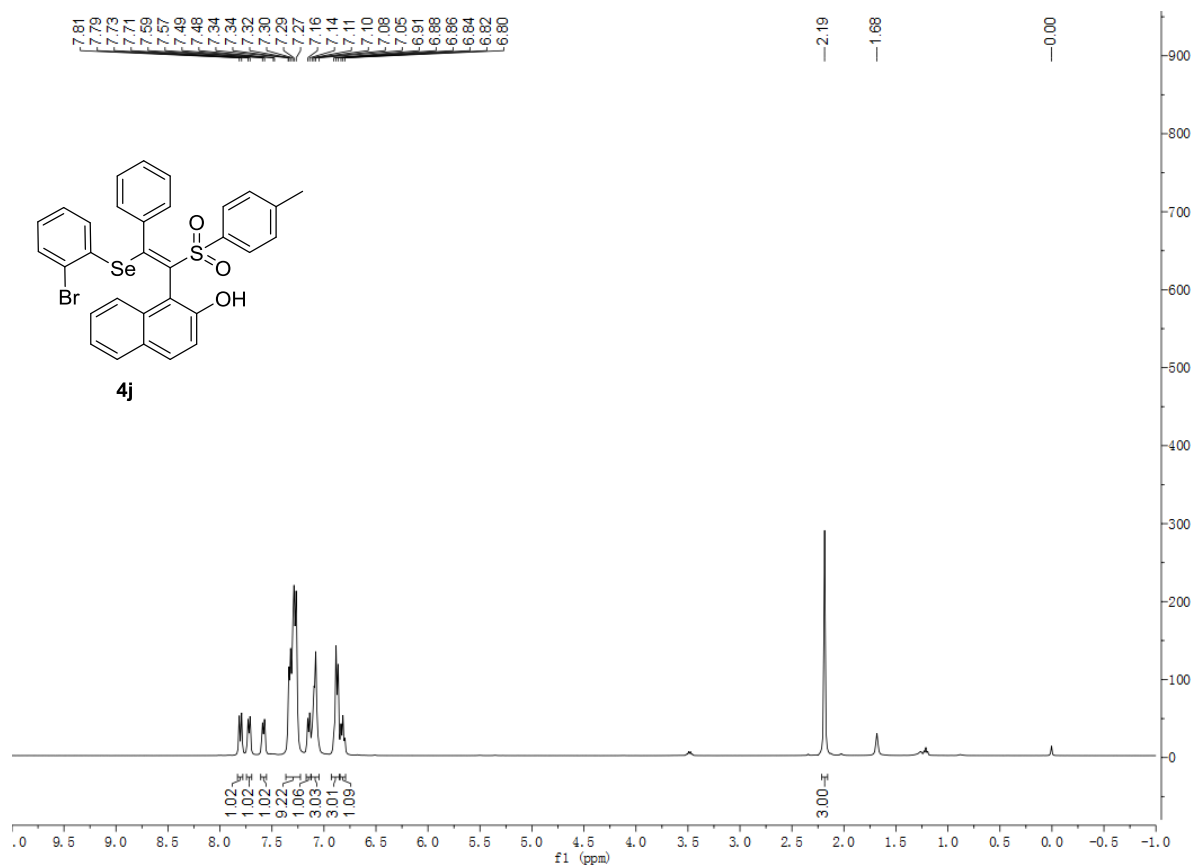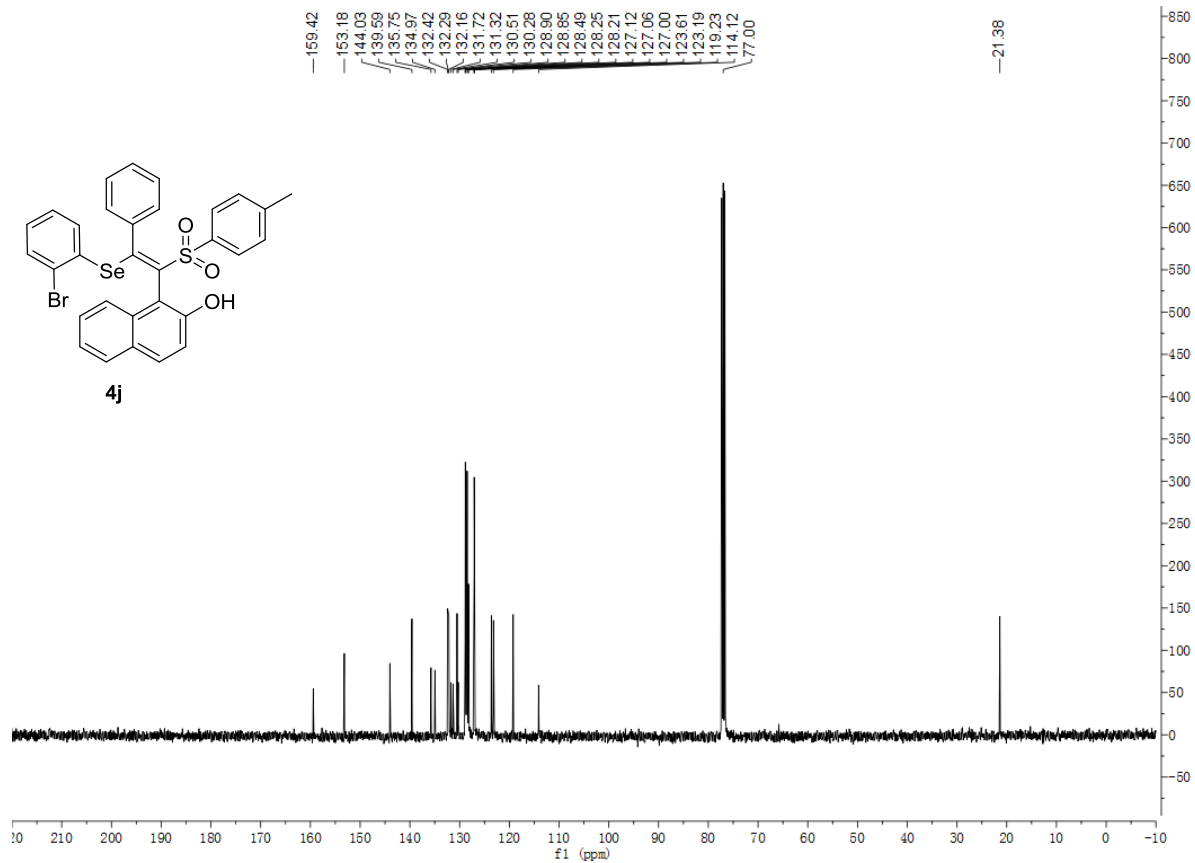

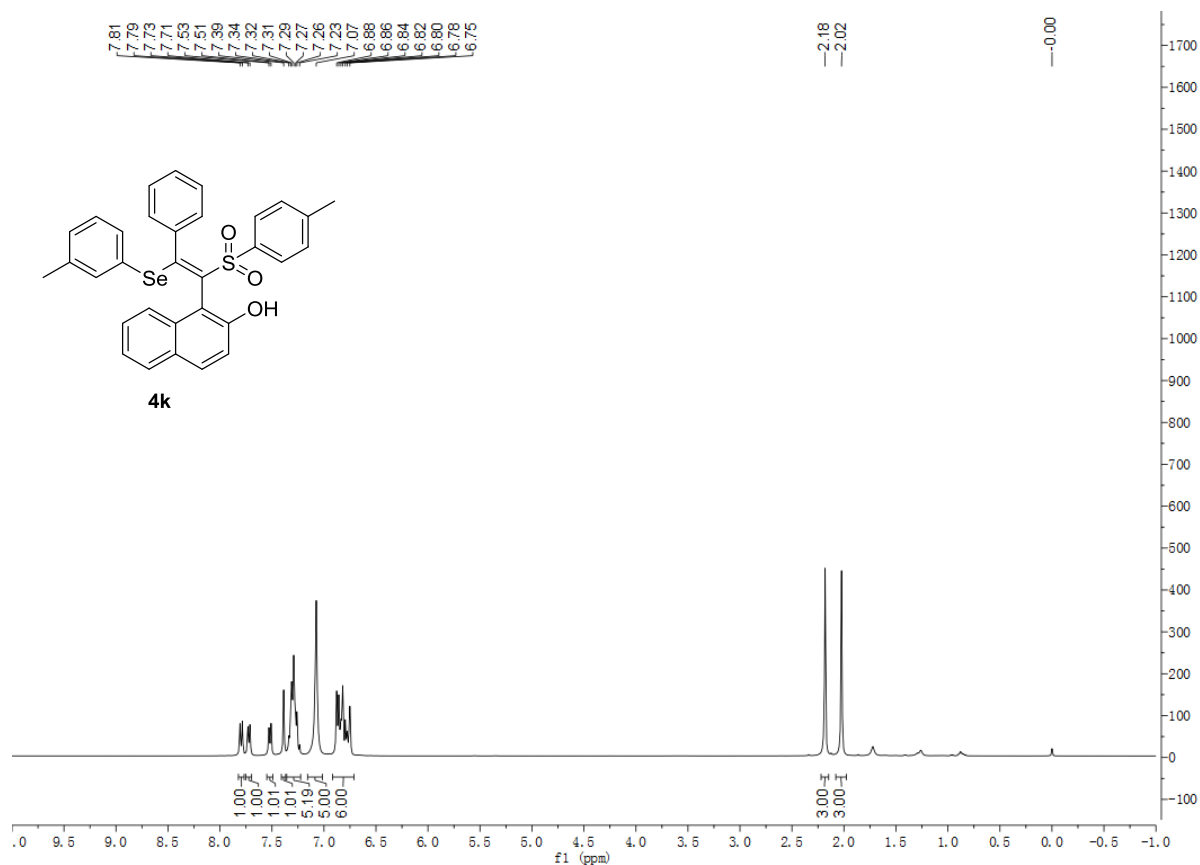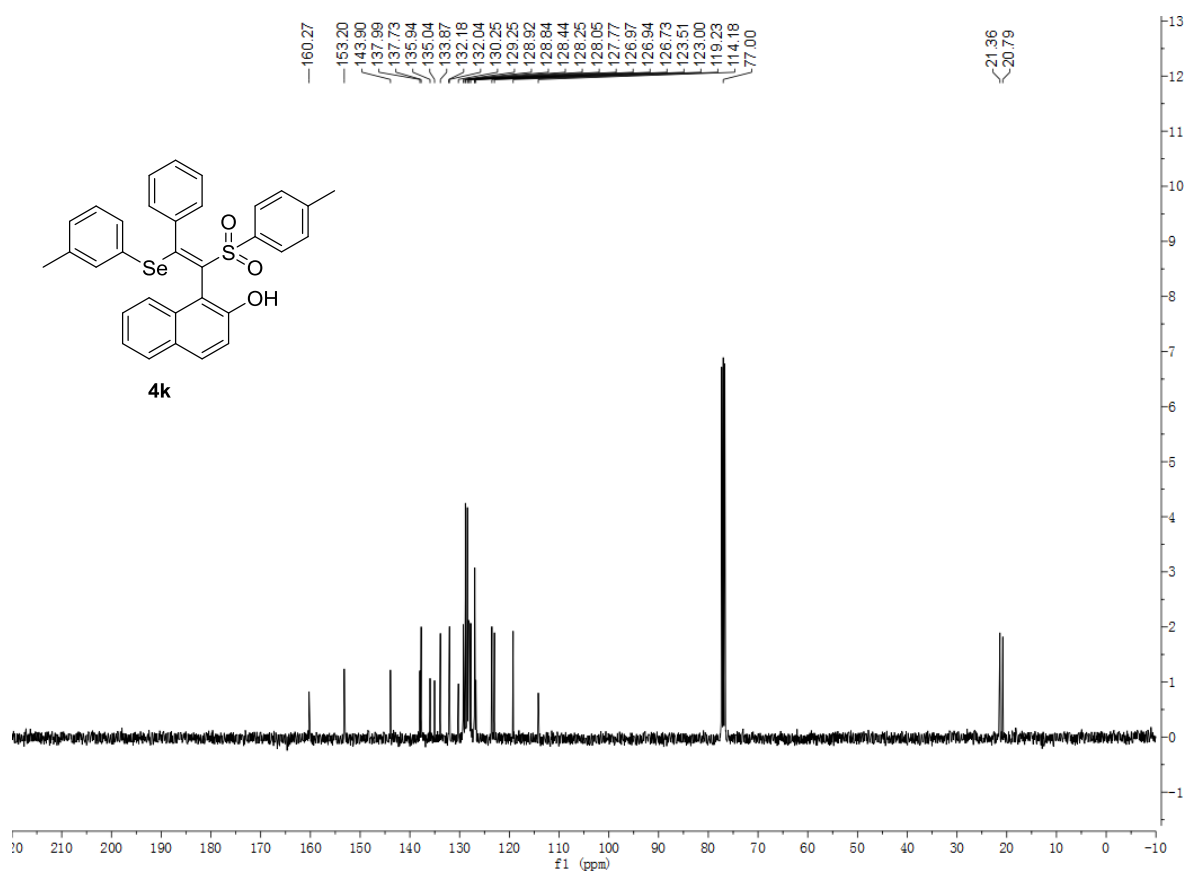

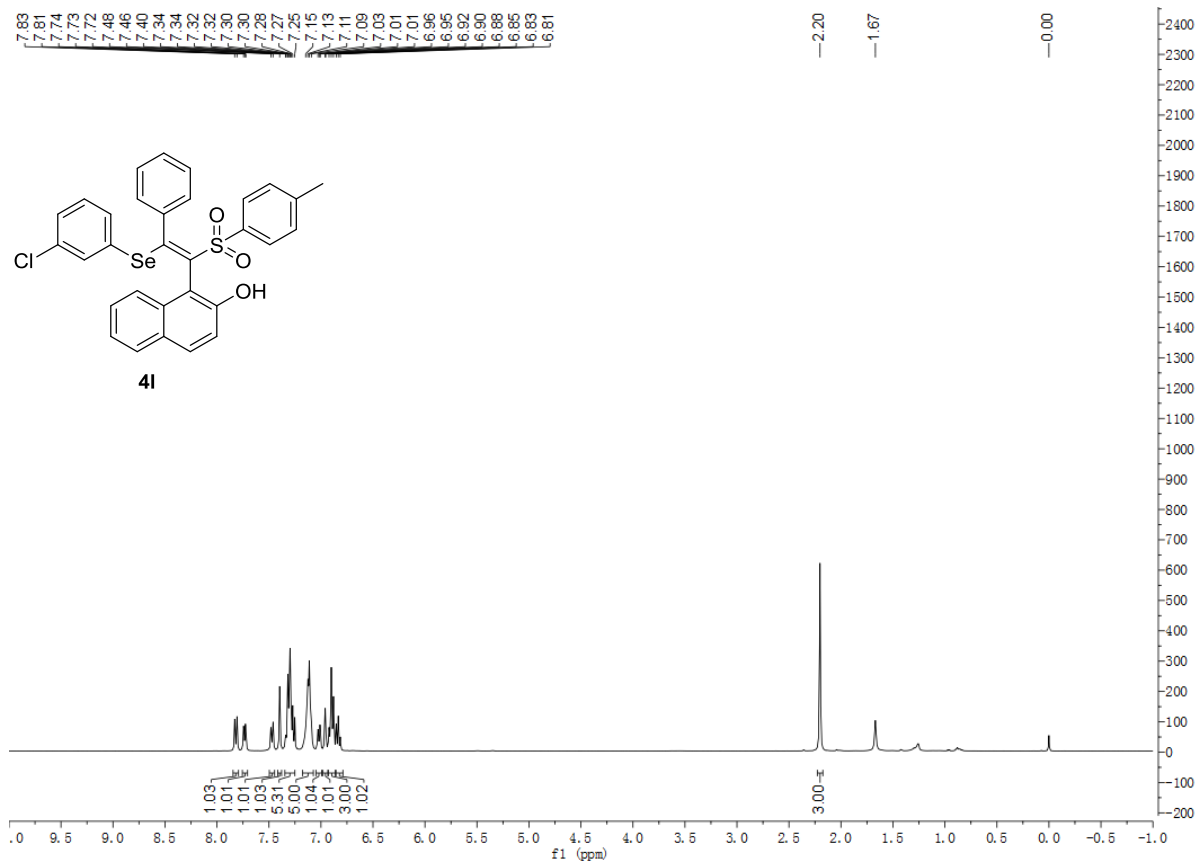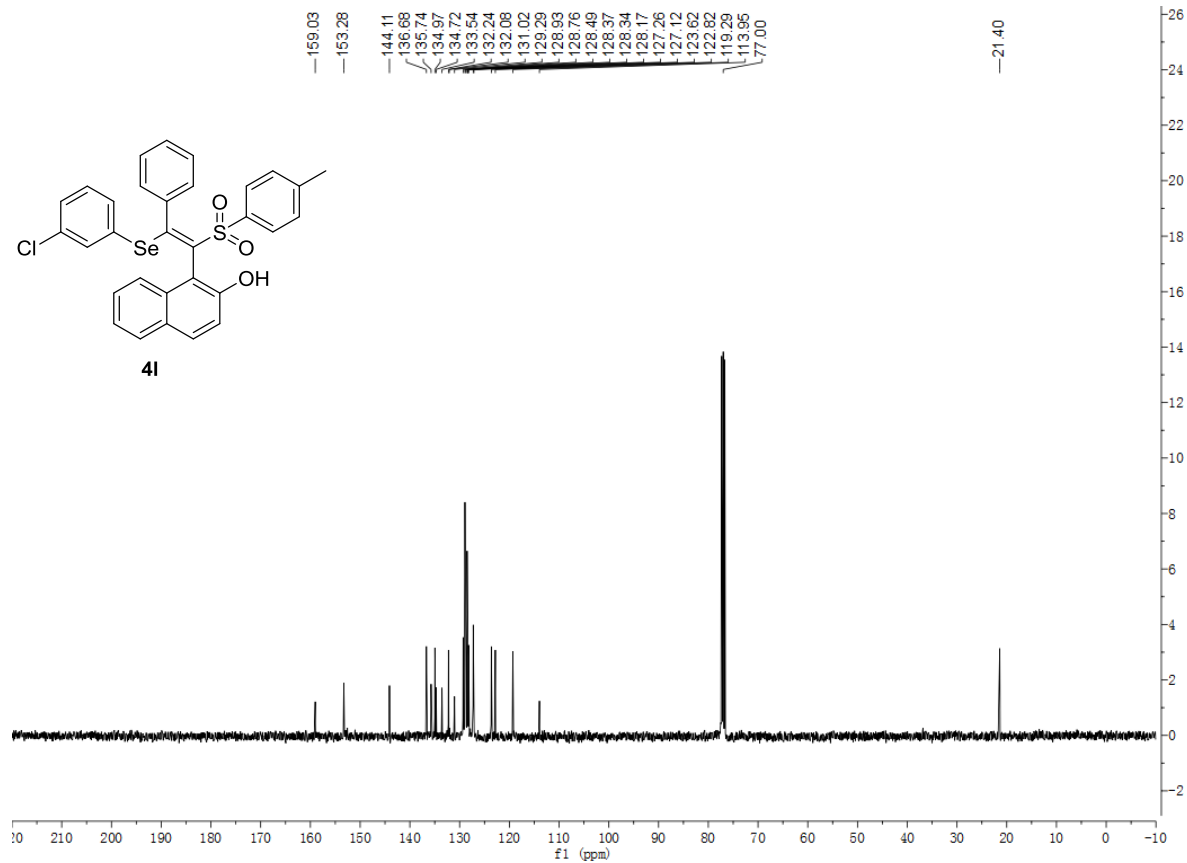

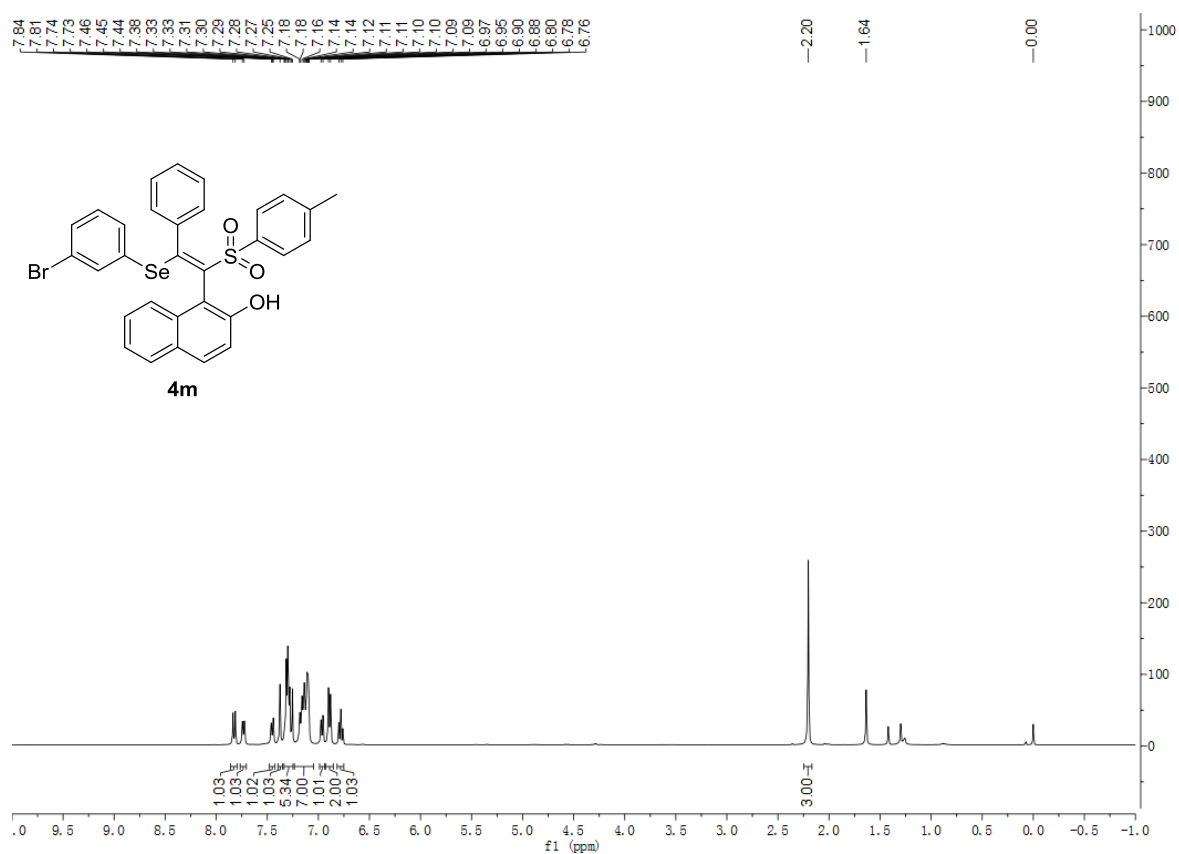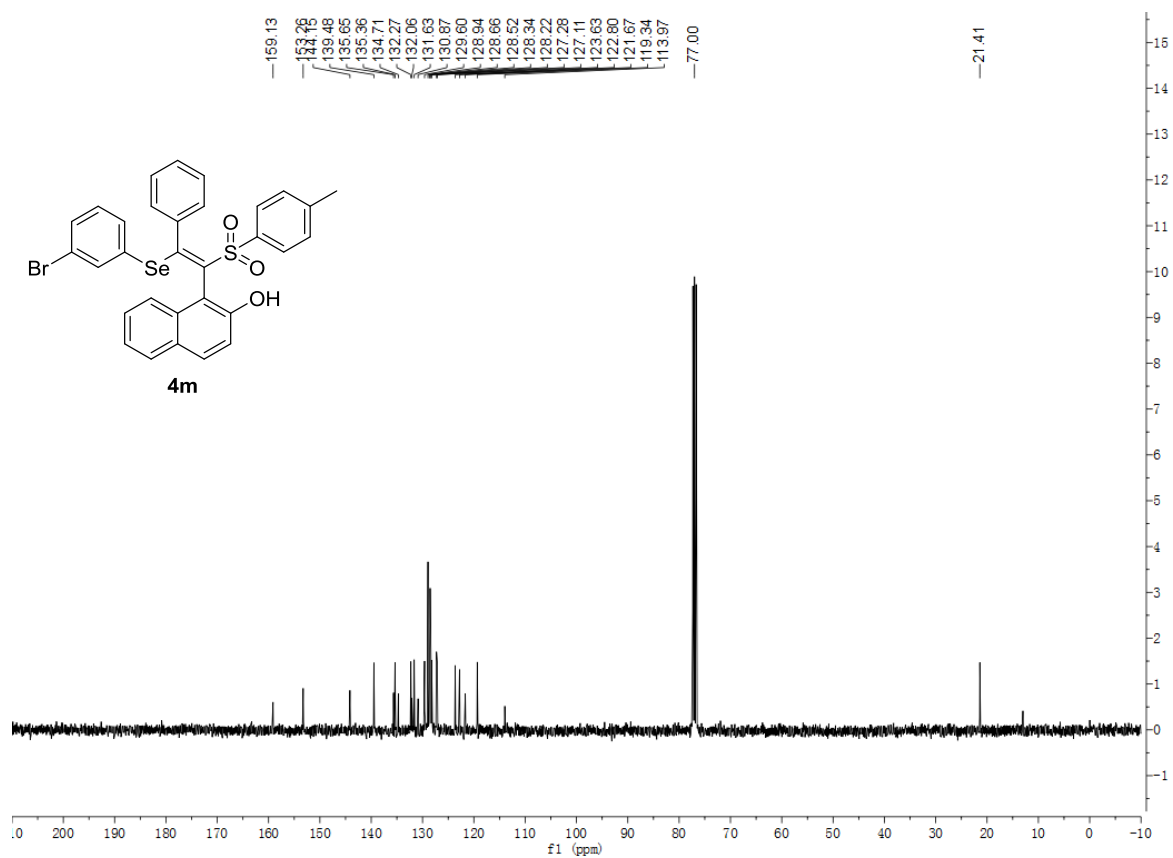

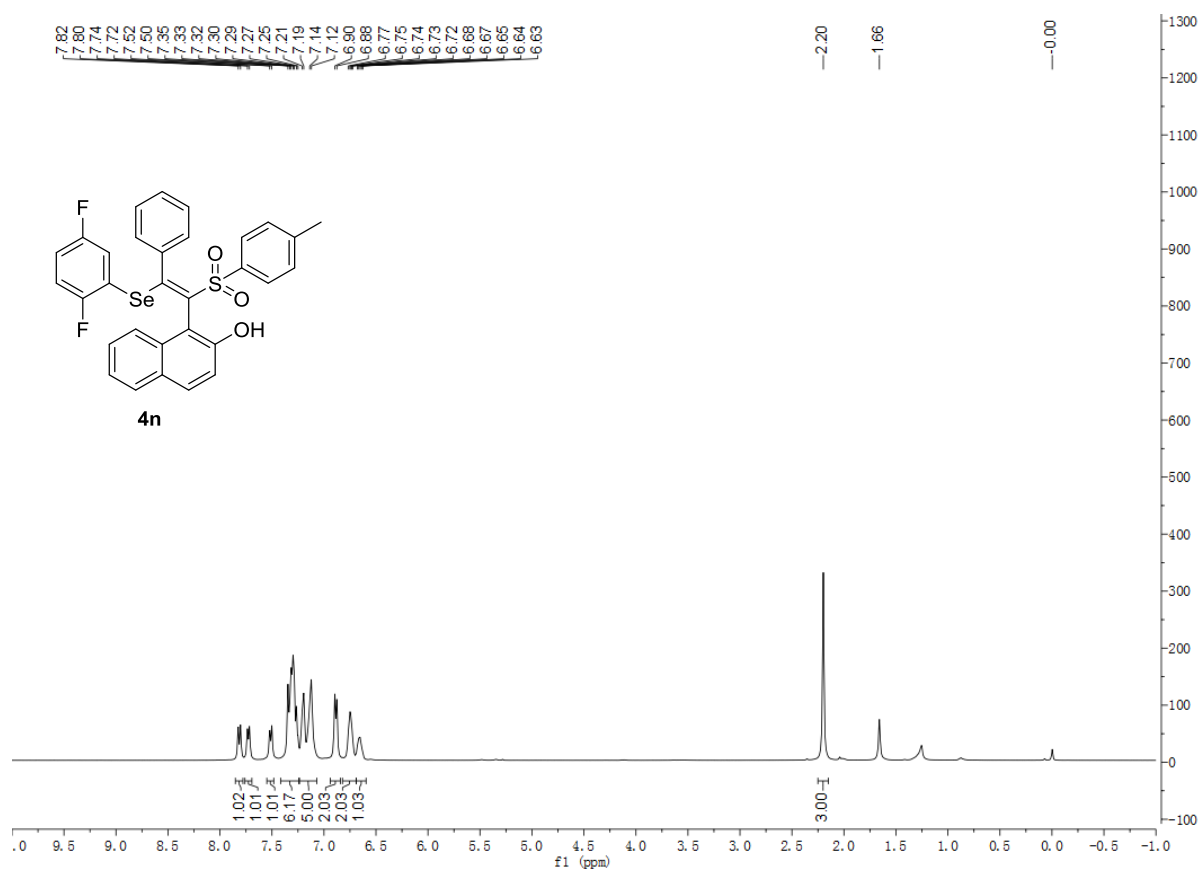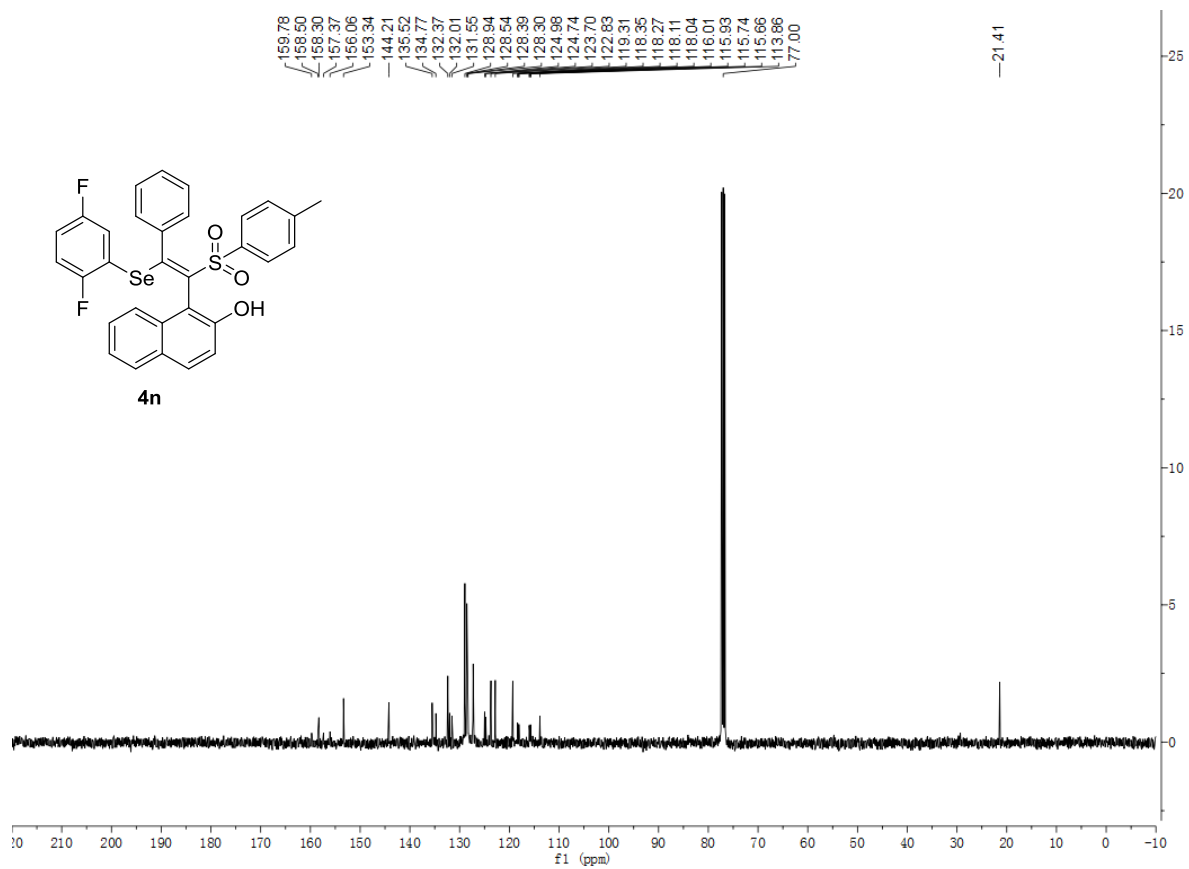

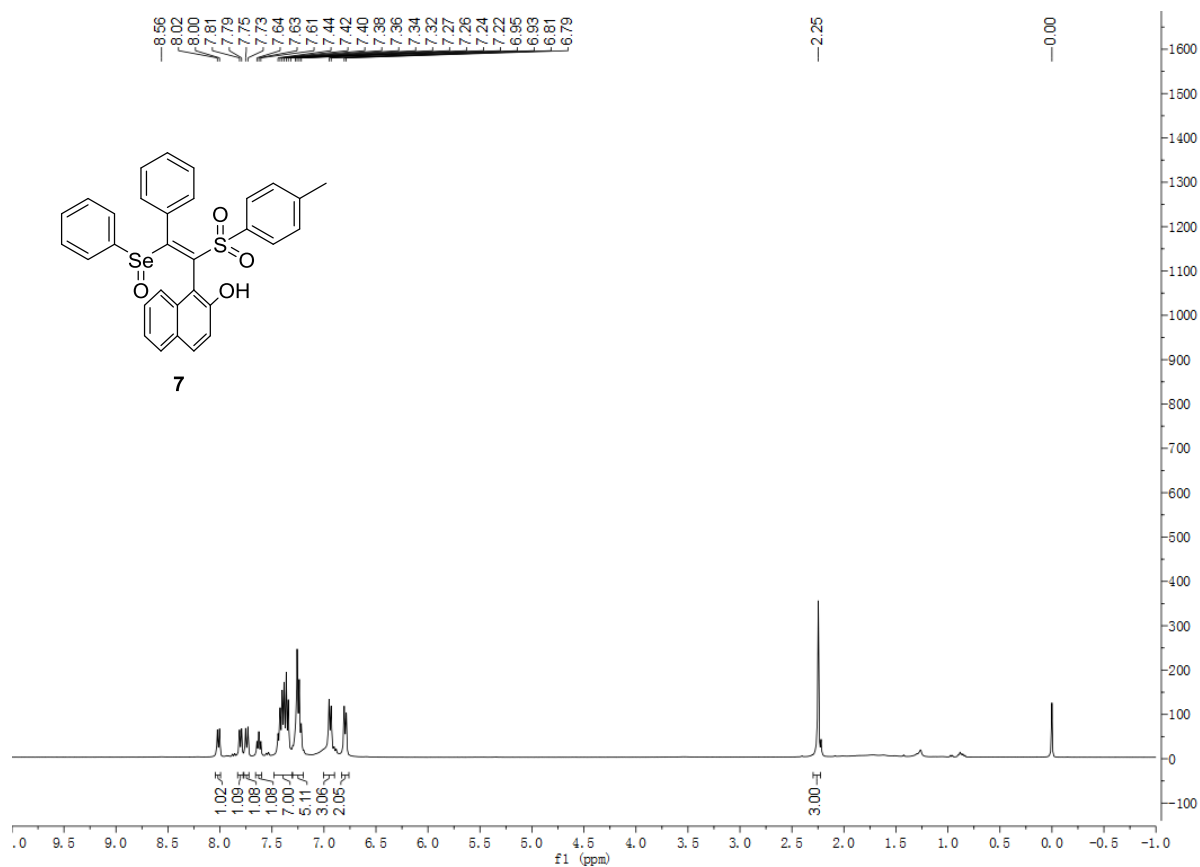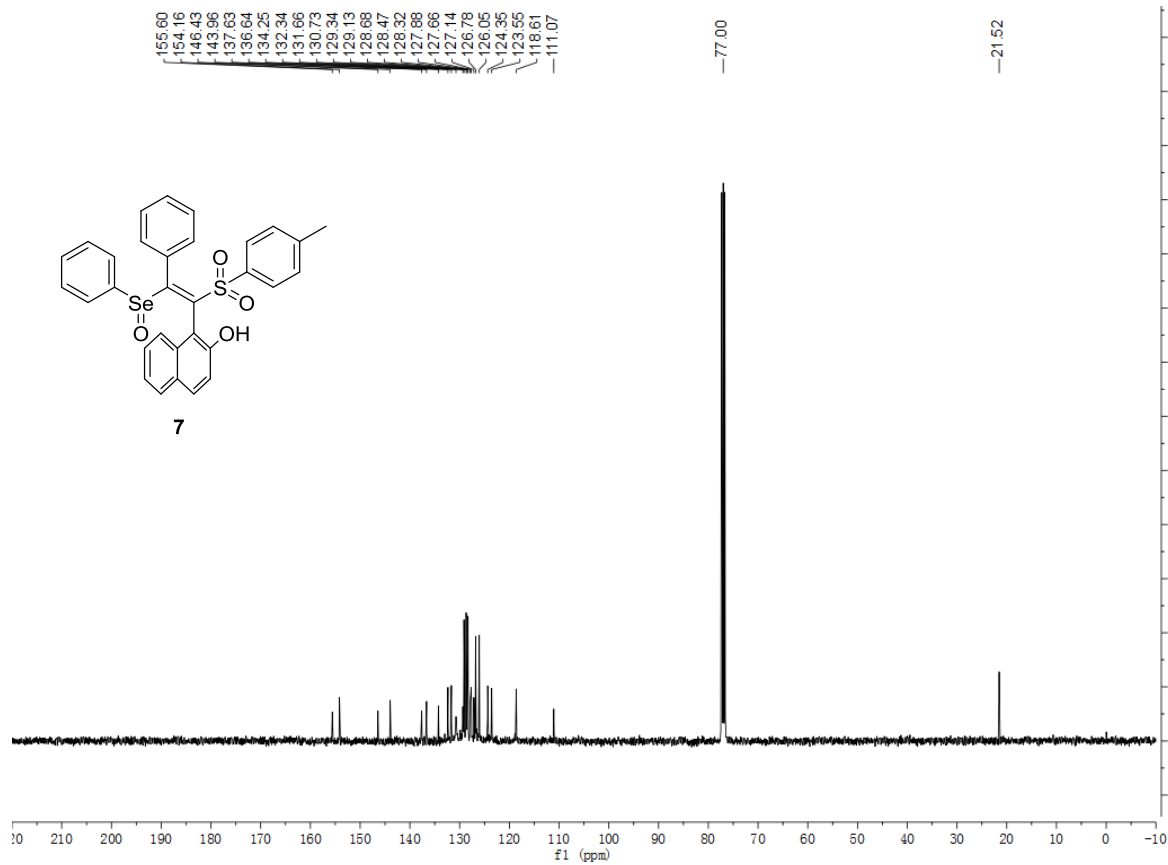

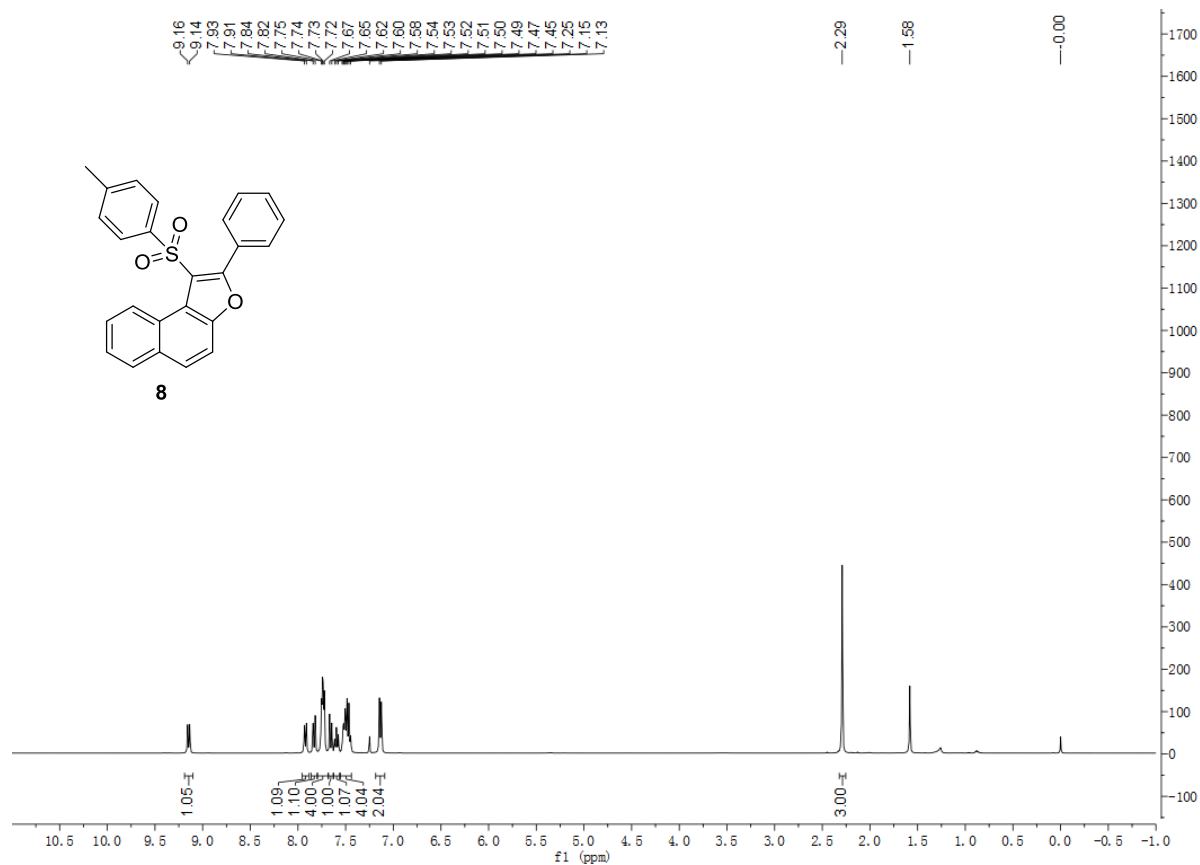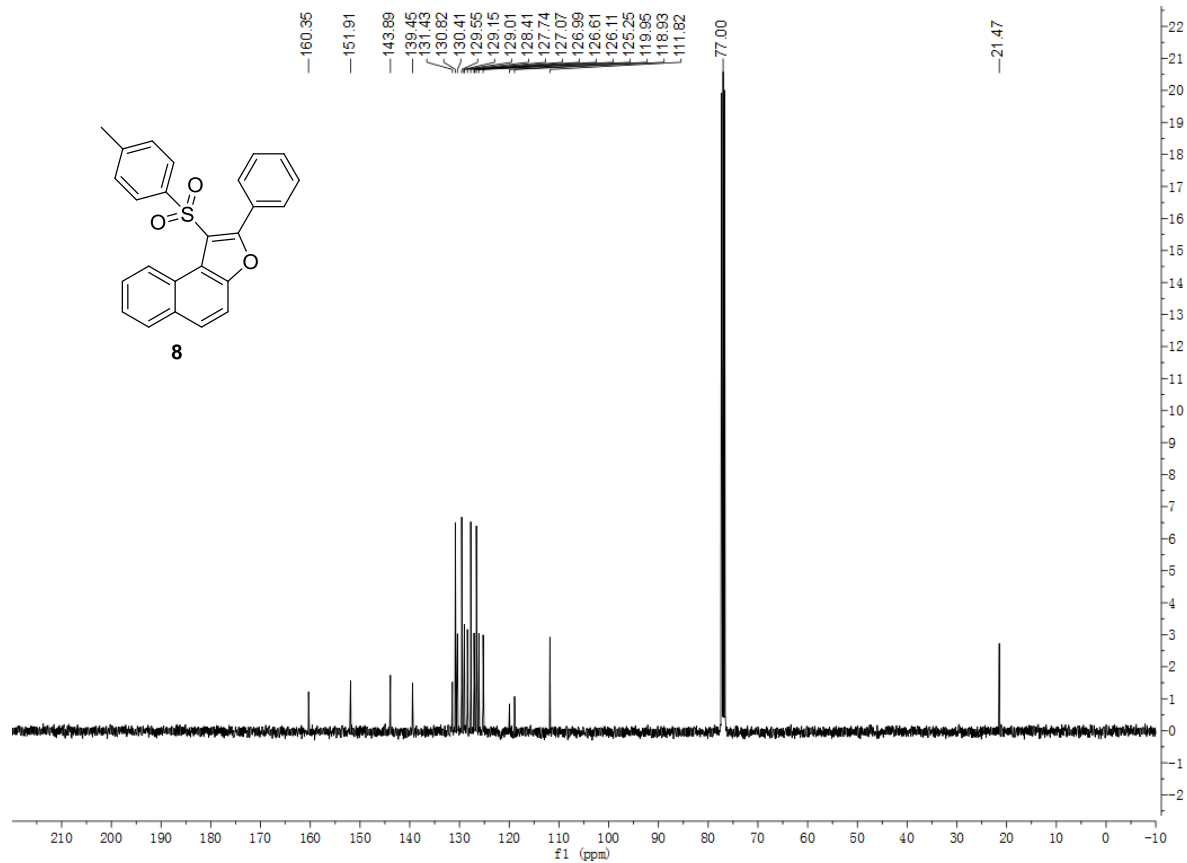

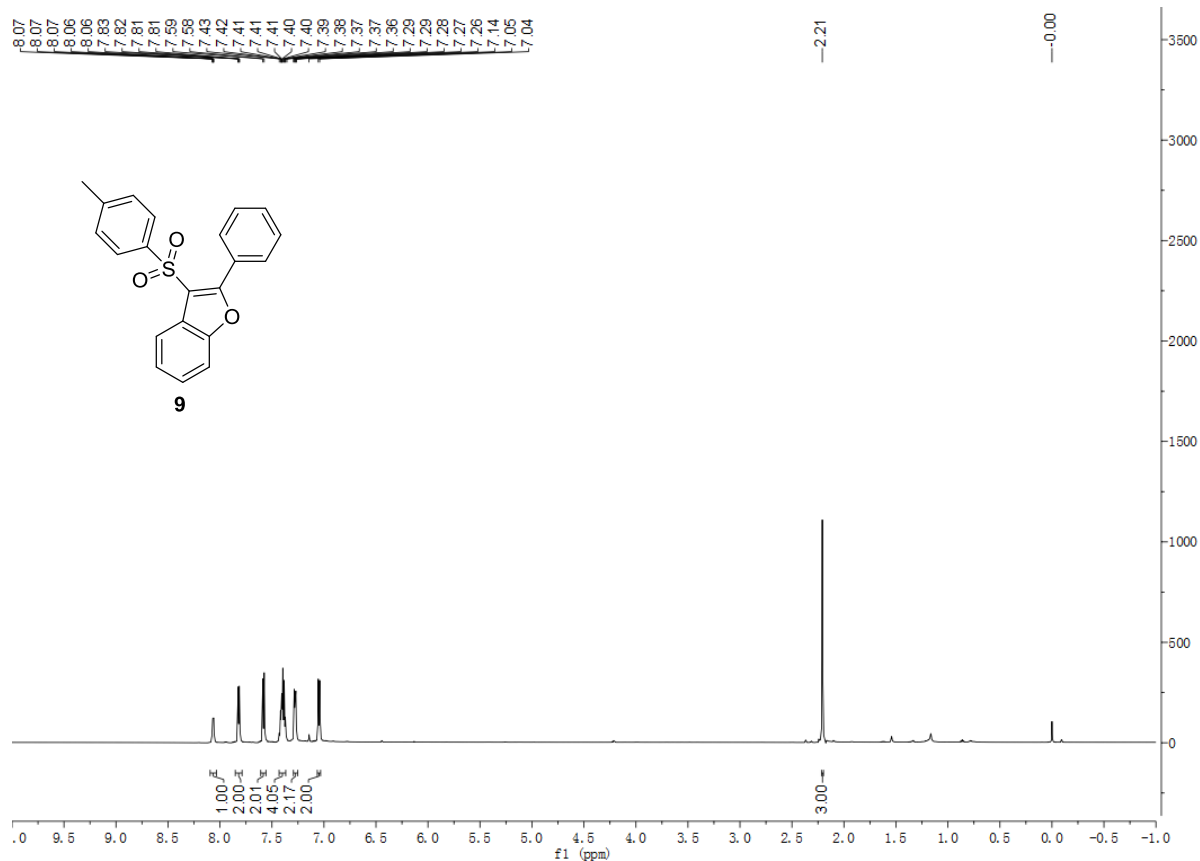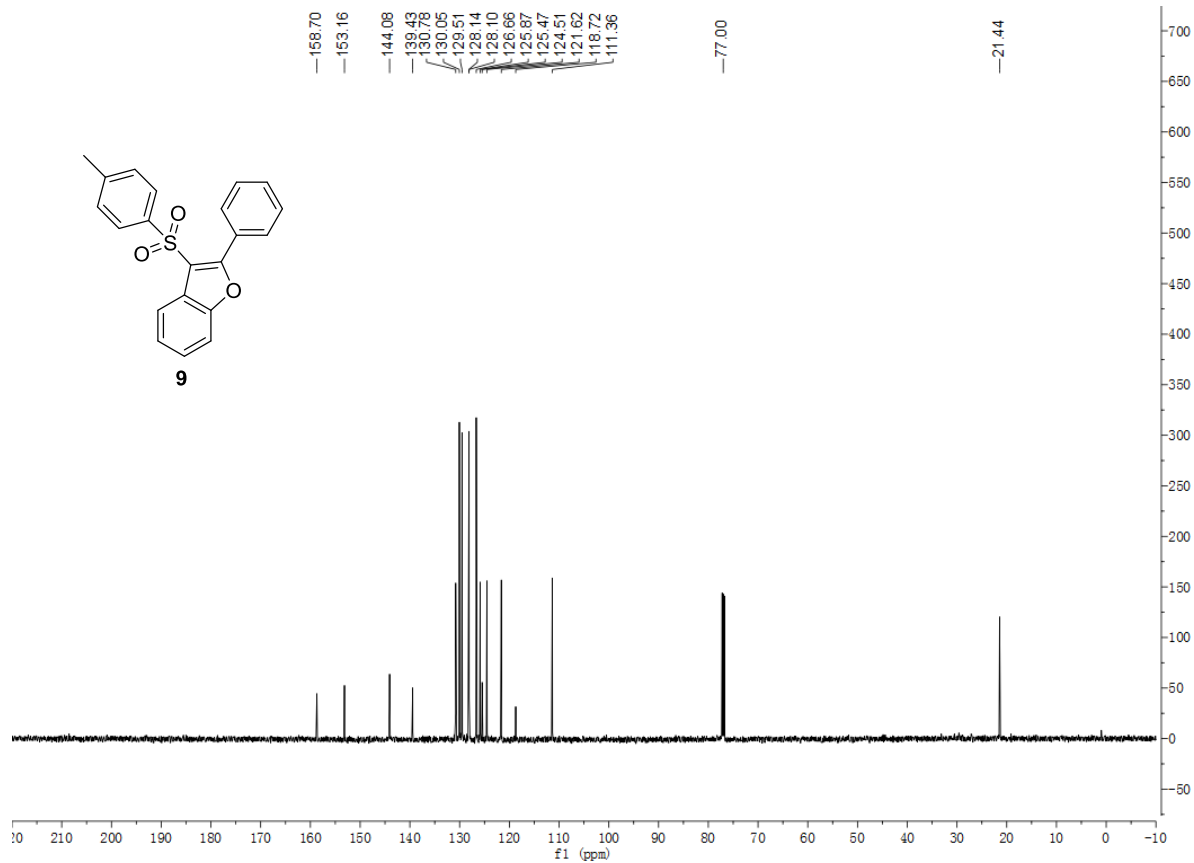

### XIII. X-Ray Crystallographic information

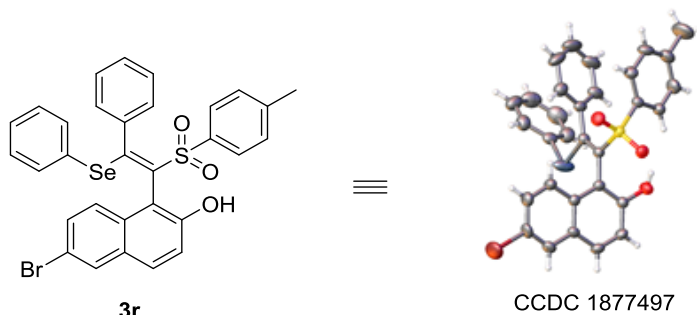

|                        |                                |                                                                      |
|------------------------|--------------------------------|----------------------------------------------------------------------|
| Bond precision:        | C-C = 0.0049 Å                 | Wavelength = 0.71073                                                 |
| Cell:                  | a = 14.8543 (4)<br>alpha = 90  | b = 12.8156 (3)<br>beta = 105.20(3)<br>c = 16.9743 (5)<br>gamma = 90 |
| Temperature:           | 295 K                          |                                                                      |
|                        | Calculated                     | Reported                                                             |
| Volume                 | 3120.95(15)                    | 3120.94 (15)                                                         |
| Space group            | P 21/c                         | P 1 21/c 1                                                           |
| Hall group             | : -P 2ybc                      | -P 2ybc                                                              |
| Moiety formula         | C31 H23 Br O3 S Se [+ solvent] | C31 H23 Br O3 S Se                                                   |
| Sum formula            | C31 H23 Br O3 S Se [+ solvent] | C24 H17 Br O3 S Se                                                   |
| Mr                     | 634.41                         | 634.42                                                               |
| Dx, g cm <sup>-3</sup> | 1.350                          | 1.350                                                                |
| Z                      | 4                              | 4                                                                    |
| Mu (mm <sup>-1</sup> ) | 2.577                          | 2.577                                                                |
| F000                   | 1272.0                         | 1272.0                                                               |
| F000'                  | 1271.47                        |                                                                      |
| h, k, lmax             | 18, 16, 21                     | 18, 16, 21                                                           |
| Nref                   | 6391                           | 6378                                                                 |
| Tmin, Tmax             | 0.352, 0.366                   | 0.691, 1.000                                                         |
| Tmin'                  | 0.326                          |                                                                      |

Correction method= # Reported T Limits: Tmin=0.691 Tmax=1.000  
AbsCorr = MULTI-SCAN

|                                 |                                  |
|---------------------------------|----------------------------------|
| Data completeness = 0.998       | Theta(max) = 26.372              |
| R(reflections) = 0.0435 ( 4724) | wR2(reflections) = 0.1184( 6378) |
| S = 1.048                       | Npar = 336                       |

#### XIV. Reference

- 1 S. Jia, Z. Chen, N. Zhang, Y. Tan, Y. Liu, J. Deng and H. Yan, *J. Am. Chem. Soc.*, 2018, **140**, 7056–7060.
- 2 D. Li, Y. Tan, L. Peng, S. Li, N. Zhang, Y. Liu and H. Yan, *Org. Lett.*, 2018, **20**, 4959–4963.
- 3 D. Singh, A. M. Deobald, L. R. S. Camargo, G. Tabarelli, O. E. D. Rodrigues and A. L. Braga, *Org. Lett.*, 2010, **12**, 3288–3291.
- 4 S. Luo, N. Zhang, Z. Wang and H. Yan, *Org. Biomol. Chem.*, 2018, **16**, 2893–2901.
- 5 T. G. Back, S. Collins and R. G. Kerr, *J. Org. Chem.*, 1983, **48**, 3077–3084.
